# Supplementary material for: PVRIG Expression Is an Independent Prognostic Factor and a New Potential Target for Immunotherapy in Hepatocellular Carcinoma
Source: MDPI journal article supplement (doi:10.3390/cancers15020447), 2023-01-10
Supplement: s1 [file s1]

# PVRIG Expression is an Independent Prognostic Factor and a New Target for Immunotherapy in Hepatocellular Carcinoma

David J Birnbaum, Maelle Picard, Quentin Da Costa, Thomas Delayre, Pascal Finetti, Olivier Cabaud, Emilie Agavnian, Bernadette de Rauglaudre, Emilie Denicolai, François Bertucci, Emilie Mamessier

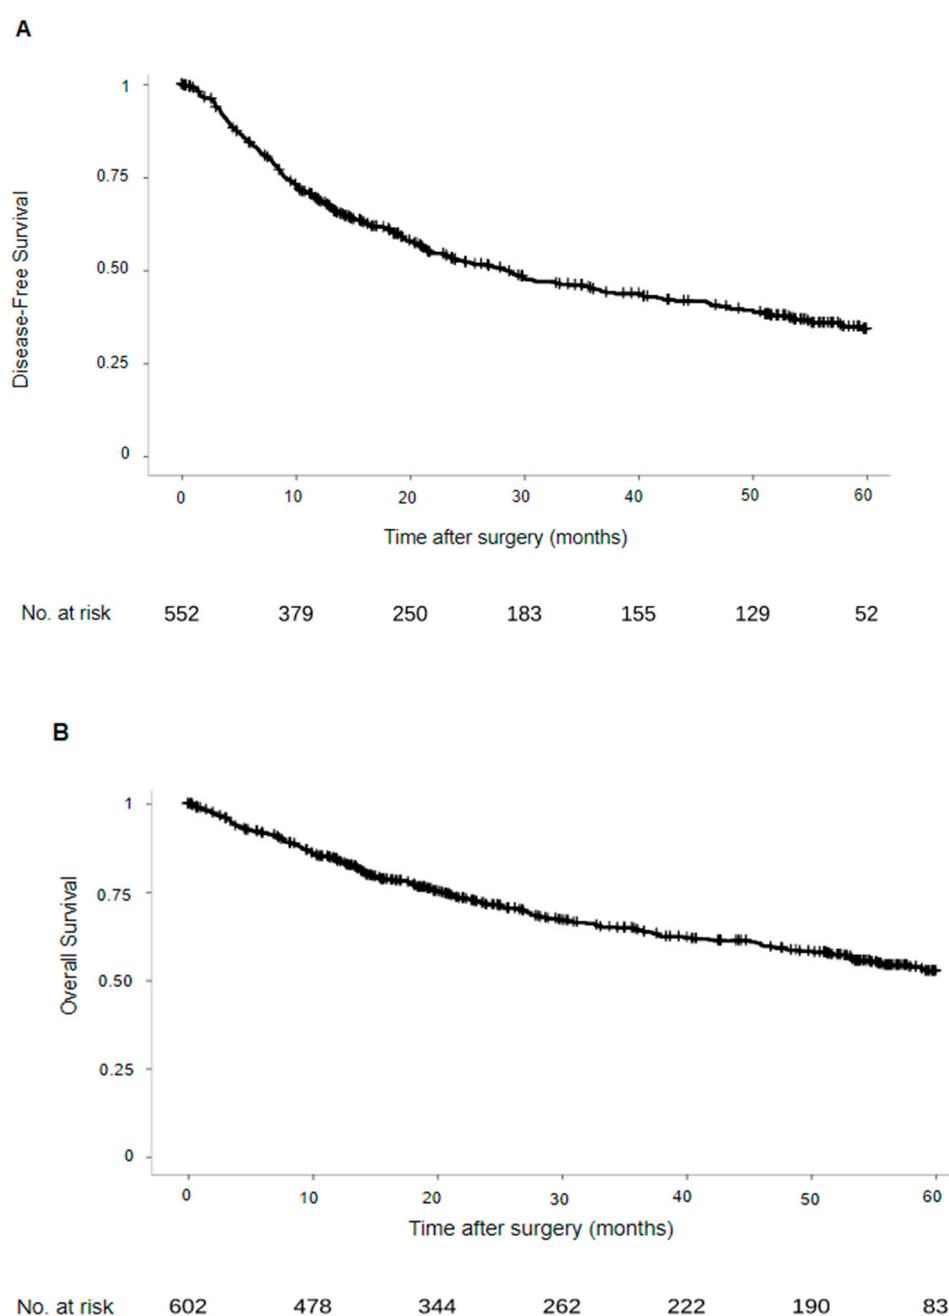

**Figure S1. Survival in patient with HCC.** (A) Kaplan-Meier DFS curve in the whole cohort of HCC patients (n=552). (B) Kaplan-Meier OS curve in the whole cohort of HCC patients (n=602). The p-value is for log rank test.

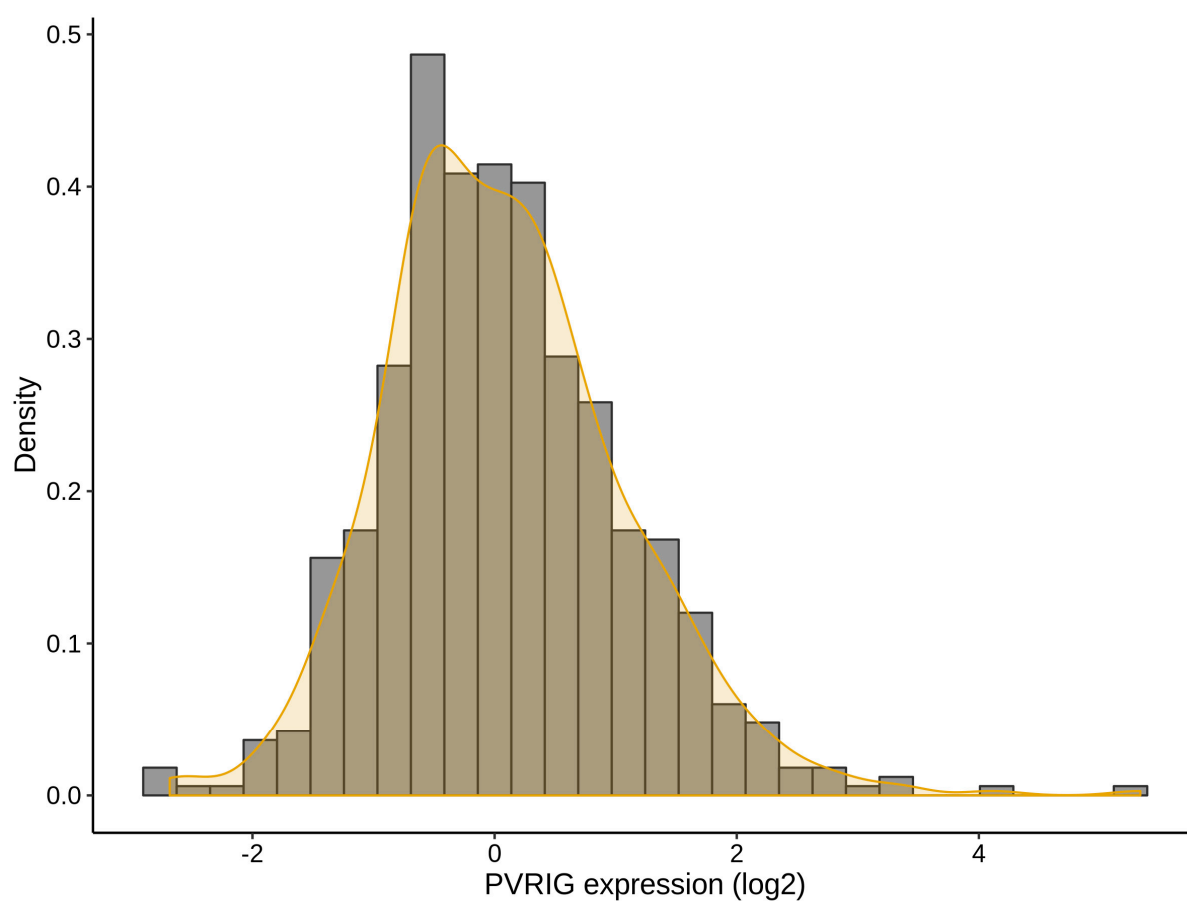

**Figure S2: Distribution of *PVRIG* expression in HCC samples.** Histogram of distribution of *PVRIG* mRNA expression levels (log2) across the 602 clinical samples. The orange line represents the density curve of distribution.

**Table S1.** Data sets included in the study

| Reference                                                  | Source of data                                                        | Samples (N) | HCC samples (n) | healthy liver samples (n) | Technological platform                                                          |
|------------------------------------------------------------|-----------------------------------------------------------------------|-------------|-----------------|---------------------------|---------------------------------------------------------------------------------|
| The Cancer Genome Atlas Research Network. <i>Cell</i> 2017 | <a href="https://www.cbioportal.org/">https://www.cbioportal.org/</a> | 360         | 360             | 0                         | Illumina HiSeq RNA-seq                                                          |
| Roessler et al., <i>Cancer Res</i> 2010                    | GEO: GSE14520                                                         | 481         | 242             | 239                       | Affymetrix Human Genome U133A 2.0 Array; Affymetrix HT Human Genome U133A Array |
| Villa et al., <i>Gut</i> 206                               | GEO: GSE54236                                                         | 161         | 81              | 80                        | Agilent-014850 Whole Human Genome Microarray 4x44K G4112F                       |
| <b>Total</b>                                               |                                                                       | <b>1002</b> | <b>683</b>      | <b>319</b>                |                                                                                 |

**Table S2.** Association between expression of members of TIGIT/DNAM-1 axis and PD-1/PD-L1 axis related RNA expression and survival in HCC and survival in HCC

| Gene symbol | Overall Survival      |                       | Disease-Free Survival |              |
|-------------|-----------------------|-----------------------|-----------------------|--------------|
|             | Univariate            | Multivariate          | Univariate            | Multivariate |
| DNAM-1      | $2.85 \times 10^{-2}$ | 0.52                  | $1.03 \times 10^{-3}$ | 0.14         |
| PD-L1       | 0.51                  | -                     | 0.67                  | -            |
| TACTILE     | $1.56 \times 10^{-2}$ | 0.57                  | $7.17 \times 10^{-4}$ | 0.77         |
| CTLA-4      | $4.87 \times 10^{-2}$ | 0.79                  | $5.08 \times 10^{-3}$ | 0.49         |
| KIR2DL5A    | 0.18                  | -                     | 0.19                  | -            |
| NECTIN-1    | $1.84 \times 10^{-2}$ | $5.48 \times 10^{-3}$ | $6.38 \times 10^{-2}$ | -            |
| NECTIN-2    | 0.98                  | -                     | 0.41                  | -            |
| NECTIN-3    | 0.40                  | -                     | $2.16 \times 10^{-2}$ | 0.61         |
| PD-1        | $3.48 \times 10^{-2}$ | 0.20                  | $1.21 \times 10^{-3}$ | 0.36         |
| PVR         | $7.28 \times 10^{-2}$ | -                     | 0.66                  | -            |
| PVRIG       | $3.16 \times 10^{-6}$ | $4.57 \times 10^{-4}$ | $1.43 \times 10^{-4}$ | 0.37         |
| TIGIT       | 0.22                  | -                     | $2.98 \times 10^{-2}$ | 0.85         |

**Table S3.** List of the 181 genes differentially expressed between PVRIG High and Low groups in the learning set (GSE14520, n=242)

| Entrez ID | Symbol   | Full name                                    | Genomic loc | NCBI link                                                                                                                                   | Fold change | p-value        | Adjusted p-value | Upregulated (Red/Green) |
|-----------|----------|----------------------------------------------|-------------|---------------------------------------------------------------------------------------------------------------------------------------------|-------------|----------------|------------------|-------------------------|
| 79037     | PVRIG    | PVR related immunoglobulin domain containing | 7q22.1      | <a href="https://www.ncbi.nlm.nih.gov/gene/?term=79037+AND+homo+sapiens">https://www.ncbi.nlm.nih.gov/gene/?term=79037+AND+homo+sapiens</a> | 1.52        | <b>1.0E-38</b> | 1.2E-34          | <b>PVRIG_High</b>       |
| 914       | CD2      | CD2 molecule                                 | 1p13.1      | <a href="https://www.ncbi.nlm.nih.gov/gene/?term=914+AND+homo+sapiens">https://www.ncbi.nlm.nih.gov/gene/?term=914+AND+homo+sapiens</a>     | 2.48        | <b>1.3E-19</b> | 7.1E-16          | <b>PVRIG_High</b>       |
| 1043      | CD52     | CD52 molecule                                | 1p36.11     | <a href="https://www.ncbi.nlm.nih.gov/gene/?term=1043+AND+homo+sapiens">https://www.ncbi.nlm.nih.gov/gene/?term=1043+AND+homo+sapiens</a>   | 2.45        | <b>1.3E-18</b> | 3.9E-15          | <b>PVRIG_High</b>       |
| 962       | CD48     | CD48 molecule                                | 1q23.3      | <a href="https://www.ncbi.nlm.nih.gov/gene/?term=962+AND+homo+sapiens">https://www.ncbi.nlm.nih.gov/gene/?term=962+AND+homo+sapiens</a>     | 2.14        | <b>1.7E-18</b> | 3.9E-15          | <b>PVRIG_High</b>       |
| 5880      | RAC2     | Rac family small GTPase 2                    | 22q13.1     | <a href="https://www.ncbi.nlm.nih.gov/gene/?term=5880+AND+homo+sapiens">https://www.ncbi.nlm.nih.gov/gene/?term=5880+AND+homo+sapiens</a>   | 2.21        | <b>6.9E-18</b> | 1.3E-14          | <b>PVRIG_High</b>       |
| 80342     | TRAF3IP3 | TRAF3 interacting protein 3                  | 1q32.2      | <a href="https://www.ncbi.nlm.nih.gov/gene/?term=80342+AND+homo+sapiens">https://www.ncbi.nlm.nih.gov/gene/?term=80342+AND+homo+sapiens</a> | 1.67        | <b>2.5E-17</b> | 4.1E-14          | <b>PVRIG_High</b>       |
| 11151     | CORO1A   | coronin 1A                                   | 16p11.2     | <a href="https://www.ncbi.nlm.nih.gov/gene/?term=11151+AND+homo+sapiens">https://www.ncbi.nlm.nih.gov/gene/?term=11151+AND+homo+sapiens</a> | 2.36        | <b>3.8E-17</b> | 4.9E-14          | <b>PVRIG_High</b>       |
| 6352      | CCL5     | C-C motif chemokine ligand 5                 | 17q12       | <a href="https://www.ncbi.nlm.nih.gov/gene/?term=6352+AND+homo+sapiens">https://www.ncbi.nlm.nih.gov/gene/?term=6352+AND+homo+sapiens</a>   | 2.95        | <b>3.9E-17</b> | 4.9E-14          | <b>PVRIG_High</b>       |
| 10125     | RASGRP1  | RAS guanyl releasing protein 1               | 15q14       | <a href="https://www.ncbi.nlm.nih.gov/gene/?term=10125+AND+homo+sapiens">https://www.ncbi.nlm.nih.gov/gene/?term=10125+AND+homo+sapiens</a> | 1.94        | <b>8.9E-17</b> | 8.4E-14          | <b>PVRIG_High</b>       |
| 10659     | CELF2    | CUGBP Elav-like family member 2              | 10p14       | <a href="https://www.ncbi.nlm.nih.gov/gene/?term=10659+AND+homo+sapiens">https://www.ncbi.nlm.nih.gov/gene/?term=10659+AND+homo+sapiens</a> | 2.25        | <b>2.2E-16</b> | 1.9E-13          | <b>PVRIG_High</b>       |
| 6404      | SELPLG   | selectin P ligand                            | 12q24.11    | <a href="https://www.ncbi.nlm.nih.gov/gene/?term=6404+AND+homo+sapiens">https://www.ncbi.nlm.nih.gov/gene/?term=6404+AND+homo+sapiens</a>   | 1.64        | <b>3.3E-16</b> | 2.5E-13          | <b>PVRIG_High</b>       |
| 3001      | GZMA     | granzyme A                                   | 5q11.2      | <a href="https://www.ncbi.nlm.nih.gov/gene/?term=3001+AND+homo+sapiens">https://www.ncbi.nlm.nih.gov/gene/?term=3001+AND+homo+sapiens</a>   | 2.00        | <b>4.5E-16</b> | 3.2E-13          | <b>PVRIG_High</b>       |
| 3003      | GZMK     | granzyme K                                   | 5q11.2      | <a href="https://www.ncbi.nlm.nih.gov/gene/?term=3003+AND+homo+sapiens">https://www.ncbi.nlm.nih.gov/gene/?term=3003+AND+homo+sapiens</a>   | 1.85        | <b>5.5E-16</b> | 3.6E-13          | <b>PVRIG_High</b>       |

|        |             |                                                                                   |                   |                                                                                                                                               |      |                |         |                   |
|--------|-------------|-----------------------------------------------------------------------------------|-------------------|-----------------------------------------------------------------------------------------------------------------------------------------------|------|----------------|---------|-------------------|
| 5790   | PTPRC<br>AP | protein tyrosine<br>phosphatase, re-<br>ceptor type C as-<br>sociated protein     | 11q13.2           | <a href="https://www.ncbi.nlm.nih.gov/gene/?term=5790+AND+homo+sapiens">https://www.ncbi.nlm.nih.gov/gene/?term=5790+AND+homo+sapiens</a>     | 1.56 | <b>6.0E-16</b> | 3.6E-13 | <b>PVRIG_High</b> |
| 3059   | HCLS1       | hematopoietic<br>cell-specific Lyn<br>substrate 1                                 | 3q13.33           | <a href="https://www.ncbi.nlm.nih.gov/gene/?term=3059+AND+homo+sapiens">https://www.ncbi.nlm.nih.gov/gene/?term=3059+AND+homo+sapiens</a>     | 1.94 | <b>7.7E-15</b> | 3.8E-12 | <b>PVRIG_High</b> |
| 925    | CD8A        | CD8a molecule                                                                     | 2p11.2            | <a href="https://www.ncbi.nlm.nih.gov/gene/?term=925+AND+homo+sapiens">https://www.ncbi.nlm.nih.gov/gene/?term=925+AND+homo+sapiens</a>       | 2.60 | <b>8.6E-15</b> | 4.0E-12 | <b>PVRIG_High</b> |
| 9806   | SPOCK2      | SPARC (oste-<br>onectin), cwcw<br>and kazal like do-<br>mains proteogly-<br>can 2 | 10q22.1           | <a href="https://www.ncbi.nlm.nih.gov/gene/?term=9806+AND+homo+sapiens">https://www.ncbi.nlm.nih.gov/gene/?term=9806+AND+homo+sapiens</a>     | 1.64 | <b>9.2E-15</b> | 4.0E-12 | <b>PVRIG_High</b> |
| 8530   | CST7        | cystatin F                                                                        | 20p11.21          | <a href="https://www.ncbi.nlm.nih.gov/gene/?term=8530+AND+homo+sapiens">https://www.ncbi.nlm.nih.gov/gene/?term=8530+AND+homo+sapiens</a>     | 1.61 | <b>9.3E-15</b> | 4.0E-12 | <b>PVRIG_High</b> |
| 2533   | FYB1        | FYN binding pro-<br>tein 1                                                        | 5p13.1            | <a href="https://www.ncbi.nlm.nih.gov/gene/?term=2533+AND+homo+sapiens">https://www.ncbi.nlm.nih.gov/gene/?term=2533+AND+homo+sapiens</a>     | 1.65 | <b>1.2E-14</b> | 5.1E-12 | <b>PVRIG_High</b> |
| 3937   | LCP2        | lymphocyte cyto-<br>solic protein 2                                               | 5q35.1            | <a href="https://www.ncbi.nlm.nih.gov/gene/?term=3937+AND+homo+sapiens">https://www.ncbi.nlm.nih.gov/gene/?term=3937+AND+homo+sapiens</a>     | 1.67 | <b>1.4E-14</b> | 5.7E-12 | <b>PVRIG_High</b> |
| 3561   | IL2RG       | interleukin 2 re-<br>ceptor subunit<br>gamma                                      | Xq13.1            | <a href="https://www.ncbi.nlm.nih.gov/gene/?term=3561+AND+homo+sapiens">https://www.ncbi.nlm.nih.gov/gene/?term=3561+AND+homo+sapiens</a>     | 2.17 | <b>2.0E-14</b> | 7.7E-12 | <b>PVRIG_High</b> |
| 5579   | PRKCB       | protein kinase C<br>beta                                                          | 16p12.2-<br>p12.1 | <a href="https://www.ncbi.nlm.nih.gov/gene/?term=5579+AND+homo+sapiens">https://www.ncbi.nlm.nih.gov/gene/?term=5579+AND+homo+sapiens</a>     | 1.55 | <b>2.7E-14</b> | 1.0E-11 | <b>PVRIG_High</b> |
| 22914  | KLRK1       | killer cell lectin<br>like receptor K1                                            | 12p13.2           | <a href="https://www.ncbi.nlm.nih.gov/gene/?term=22914+AND+homo+sapiens">https://www.ncbi.nlm.nih.gov/gene/?term=22914+AND+homo+sapiens</a>   | 1.80 | <b>3.6E-14</b> | 1.3E-11 | <b>PVRIG_High</b> |
| 445347 | TARP        | TCR gamma al-<br>ternate reading<br>frame protein                                 | 7p14.1            | <a href="https://www.ncbi.nlm.nih.gov/gene/?term=445347+AND+homo+sapiens">https://www.ncbi.nlm.nih.gov/gene/?term=445347+AND+homo+sapiens</a> | 1.64 | <b>4.1E-14</b> | 1.4E-11 | <b>PVRIG_High</b> |
| 5788   | PTPRC       | protein tyrosine<br>phosphatase, re-<br>ceptor type C                             | 1q31.3-<br>q32.1  | <a href="https://www.ncbi.nlm.nih.gov/gene/?term=5788+AND+homo+sapiens">https://www.ncbi.nlm.nih.gov/gene/?term=5788+AND+homo+sapiens</a>     | 2.50 | <b>4.2E-14</b> | 1.4E-11 | <b>PVRIG_High</b> |

|       |          |                                                                        |          |                                                                                                                                             |      |                |         |                   |
|-------|----------|------------------------------------------------------------------------|----------|---------------------------------------------------------------------------------------------------------------------------------------------|------|----------------|---------|-------------------|
| 5293  | PIK3CD   | phosphatidylinositol-4,5-bisphosphate 3-kinase catalytic subunit delta | 1p36.22  | <a href="https://www.ncbi.nlm.nih.gov/gene/?term=5293+AND+homo+sapiens">https://www.ncbi.nlm.nih.gov/gene/?term=5293+AND+homo+sapiens</a>   | 1.78 | <b>5.2E-14</b> | 1.7E-11 | <b>PVRIG_High</b> |
| 4046  | LSP1     | lymphocyte-specific protein 1                                          | 11p15.5  | <a href="https://www.ncbi.nlm.nih.gov/gene/?term=4046+AND+homo+sapiens">https://www.ncbi.nlm.nih.gov/gene/?term=4046+AND+homo+sapiens</a>   | 1.51 | <b>7.4E-14</b> | 2.3E-11 | <b>PVRIG_High</b> |
| 3560  | IL2RB    | interleukin 2 receptor subunit beta                                    | 22q12.3  | <a href="https://www.ncbi.nlm.nih.gov/gene/?term=3560+AND+homo+sapiens">https://www.ncbi.nlm.nih.gov/gene/?term=3560+AND+homo+sapiens</a>   | 1.61 | <b>7.8E-14</b> | 2.3E-11 | <b>PVRIG_High</b> |
| 3932  | LCK      | LCK proto-oncogene, Src family tyrosine kinase                         | 1p35.2   | <a href="https://www.ncbi.nlm.nih.gov/gene/?term=3932+AND+homo+sapiens">https://www.ncbi.nlm.nih.gov/gene/?term=3932+AND+homo+sapiens</a>   | 1.56 | <b>7.9E-14</b> | 2.3E-11 | <b>PVRIG_High</b> |
| 9595  | CYTIP    | cytohesin 1 interacting protein                                        | 2q24.1   | <a href="https://www.ncbi.nlm.nih.gov/gene/?term=9595+AND+homo+sapiens">https://www.ncbi.nlm.nih.gov/gene/?term=9595+AND+homo+sapiens</a>   | 1.87 | <b>9.7E-14</b> | 2.7E-11 | <b>PVRIG_High</b> |
| 969   | CD69     | CD69 molecule                                                          | 12p13.31 | <a href="https://www.ncbi.nlm.nih.gov/gene/?term=969+AND+homo+sapiens">https://www.ncbi.nlm.nih.gov/gene/?term=969+AND+homo+sapiens</a>     | 1.67 | <b>9.9E-14</b> | 2.7E-11 | <b>PVRIG_High</b> |
| 963   | CD53     | CD53 molecule                                                          | 1p13.3   | <a href="https://www.ncbi.nlm.nih.gov/gene/?term=963+AND+homo+sapiens">https://www.ncbi.nlm.nih.gov/gene/?term=963+AND+homo+sapiens</a>     | 2.22 | <b>1.1E-13</b> | 3.0E-11 | <b>PVRIG_High</b> |
| 5450  | POU2A F1 | POU class 2 associating factor 1                                       | 11q23.1  | <a href="https://www.ncbi.nlm.nih.gov/gene/?term=5450+AND+homo+sapiens">https://www.ncbi.nlm.nih.gov/gene/?term=5450+AND+homo+sapiens</a>   | 3.28 | <b>1.6E-13</b> | 3.9E-11 | <b>PVRIG_High</b> |
| 3689  | ITGB2    | integrin subunit beta 2                                                | 21q22.3  | <a href="https://www.ncbi.nlm.nih.gov/gene/?term=3689+AND+homo+sapiens">https://www.ncbi.nlm.nih.gov/gene/?term=3689+AND+homo+sapiens</a>   | 2.07 | <b>2.4E-13</b> | 6.0E-11 | <b>PVRIG_High</b> |
| 4050  | LTB      | lymphotoxin beta                                                       | 6p21.33  | <a href="https://www.ncbi.nlm.nih.gov/gene/?term=4050+AND+homo+sapiens">https://www.ncbi.nlm.nih.gov/gene/?term=4050+AND+homo+sapiens</a>   | 1.68 | <b>2.7E-13</b> | 6.6E-11 | <b>PVRIG_High</b> |
| 55303 | GIMAP 4  | GTPase, IMAP family member 4                                           | 7q36.1   | <a href="https://www.ncbi.nlm.nih.gov/gene/?term=55303+AND+homo+sapiens">https://www.ncbi.nlm.nih.gov/gene/?term=55303+AND+homo+sapiens</a> | 1.61 | <b>7.2E-13</b> | 1.6E-10 | <b>PVRIG_High</b> |
| 6351  | CCL4     | C-C motif chemokine ligand 4                                           | 17q12    | <a href="https://www.ncbi.nlm.nih.gov/gene/?term=6351+AND+homo+sapiens">https://www.ncbi.nlm.nih.gov/gene/?term=6351+AND+homo+sapiens</a>   | 2.00 | <b>9.2E-13</b> | 2.0E-10 | <b>PVRIG_High</b> |
| 4818  | NKG7     | natural killer cell granule protein 7                                  | 19q13.41 | <a href="https://www.ncbi.nlm.nih.gov/gene/?term=4818+AND+homo+sapiens">https://www.ncbi.nlm.nih.gov/gene/?term=4818+AND+homo+sapiens</a>   | 1.86 | <b>9.3E-13</b> | 2.0E-10 | <b>PVRIG_High</b> |
| 6503  | SLA      | Src like adaptor                                                       | 8q24.22  | <a href="https://www.ncbi.nlm.nih.gov/gene/?term=6503+AND+homo+sapiens">https://www.ncbi.nlm.nih.gov/gene/?term=6503+AND+homo+sapiens</a>   | 1.72 | <b>1.2E-12</b> | 2.6E-10 | <b>PVRIG_High</b> |

|       |        |                                              |         |                                                                                                                                             |      |                |         |                   |
|-------|--------|----------------------------------------------|---------|---------------------------------------------------------------------------------------------------------------------------------------------|------|----------------|---------|-------------------|
| 54440 | SASH3  | SAM and SH3 domain containing 3              | Xq26.1  | <a href="https://www.ncbi.nlm.nih.gov/gene/?term=54440+AND+homo+sapiens">https://www.ncbi.nlm.nih.gov/gene/?term=54440+AND+homo+sapiens</a> | 1.58 | <b>1.8E-12</b> | 3.8E-10 | <b>PVRIG_High</b> |
| 3512  | JCHAIN | joining chain of multimeric IgA and IgM      | 4q13.3  | <a href="https://www.ncbi.nlm.nih.gov/gene/?term=3512+AND+homo+sapiens">https://www.ncbi.nlm.nih.gov/gene/?term=3512+AND+homo+sapiens</a>   | 4.06 | <b>2.3E-12</b> | 4.6E-10 | <b>PVRIG_High</b> |
| 199   | AIF1   | allograft inflammatory factor 1              | 6p21.33 | <a href="https://www.ncbi.nlm.nih.gov/gene/?term=199+AND+homo+sapiens">https://www.ncbi.nlm.nih.gov/gene/?term=199+AND+homo+sapiens</a>     | 1.64 | <b>3.9E-12</b> | 7.7E-10 | <b>PVRIG_High</b> |
| 4283  | CXCL9  | C-X-C motif chemokine ligand 9               | 4q21.1  | <a href="https://www.ncbi.nlm.nih.gov/gene/?term=4283+AND+homo+sapiens">https://www.ncbi.nlm.nih.gov/gene/?term=4283+AND+homo+sapiens</a>   | 4.04 | <b>8.7E-12</b> | 1.6E-09 | <b>PVRIG_High</b> |
| 9535  | GMFG   | glia maturation factor gamma                 | 19q13.2 | <a href="https://www.ncbi.nlm.nih.gov/gene/?term=9535+AND+homo+sapiens">https://www.ncbi.nlm.nih.gov/gene/?term=9535+AND+homo+sapiens</a>   | 1.69 | <b>9.2E-12</b> | 1.7E-09 | <b>PVRIG_High</b> |
| 6402  | SELL   | selectin L                                   | 1q24.2  | <a href="https://www.ncbi.nlm.nih.gov/gene/?term=6402+AND+homo+sapiens">https://www.ncbi.nlm.nih.gov/gene/?term=6402+AND+homo+sapiens</a>   | 1.60 | <b>1.0E-11</b> | 1.8E-09 | <b>PVRIG_High</b> |
| 2123  | EVI2A  | ecotropic viral integration site 2A          | 17q11.2 | <a href="https://www.ncbi.nlm.nih.gov/gene/?term=2123+AND+homo+sapiens">https://www.ncbi.nlm.nih.gov/gene/?term=2123+AND+homo+sapiens</a>   | 1.66 | <b>1.2E-11</b> | 2.0E-09 | <b>PVRIG_High</b> |
| 7351  | UCP2   | uncoupling protein 2                         | 11q13.4 | <a href="https://www.ncbi.nlm.nih.gov/gene/?term=7351+AND+homo+sapiens">https://www.ncbi.nlm.nih.gov/gene/?term=7351+AND+homo+sapiens</a>   | 2.06 | <b>1.4E-11</b> | 2.4E-09 | <b>PVRIG_High</b> |
| 712   | C1QA   | complement C1q A chain                       | 1p36.12 | <a href="https://www.ncbi.nlm.nih.gov/gene/?term=712+AND+homo+sapiens">https://www.ncbi.nlm.nih.gov/gene/?term=712+AND+homo+sapiens</a>     | 2.18 | <b>1.5E-11</b> | 2.6E-09 | <b>PVRIG_High</b> |
| 113   | ADCY7  | adenylate cyclase 7                          | 16q12.1 | <a href="https://www.ncbi.nlm.nih.gov/gene/?term=113+AND+homo+sapiens">https://www.ncbi.nlm.nih.gov/gene/?term=113+AND+homo+sapiens</a>     | 1.51 | <b>1.7E-11</b> | 2.9E-09 | <b>PVRIG_High</b> |
| 5341  | PLEK   | pleckstrin                                   | 2p14    | <a href="https://www.ncbi.nlm.nih.gov/gene/?term=5341+AND+homo+sapiens">https://www.ncbi.nlm.nih.gov/gene/?term=5341+AND+homo+sapiens</a>   | 2.11 | <b>1.8E-11</b> | 3.0E-09 | <b>PVRIG_High</b> |
| 2124  | EVI2B  | ecotropic viral integration site 2B          | 17q11.2 | <a href="https://www.ncbi.nlm.nih.gov/gene/?term=2124+AND+homo+sapiens">https://www.ncbi.nlm.nih.gov/gene/?term=2124+AND+homo+sapiens</a>   | 2.03 | <b>2.6E-11</b> | 4.0E-09 | <b>PVRIG_High</b> |
| 7456  | WIPF1  | WAS/WASL interacting protein family member 1 | 2q31.1  | <a href="https://www.ncbi.nlm.nih.gov/gene/?term=7456+AND+homo+sapiens">https://www.ncbi.nlm.nih.gov/gene/?term=7456+AND+homo+sapiens</a>   | 1.83 | <b>3.9E-11</b> | 5.9E-09 | <b>PVRIG_High</b> |
| 4065  | LY75   | lymphocyte antigen 75                        | 2q24.2  | <a href="https://www.ncbi.nlm.nih.gov/gene/?term=4065+AND+homo+sapiens">https://www.ncbi.nlm.nih.gov/gene/?term=4065+AND+homo+sapiens</a>   | 1.97 | <b>4.3E-11</b> | 6.4E-09 | <b>PVRIG_High</b> |



|       |          |                                                           |         |                                                                                                                                             |      |                |         |                   |
|-------|----------|-----------------------------------------------------------|---------|---------------------------------------------------------------------------------------------------------------------------------------------|------|----------------|---------|-------------------|
| 6772  | STAT1    | signal transducer and activator of transcription 1        | 2q32.2  | <a href="https://www.ncbi.nlm.nih.gov/gene/?term=6772+AND+homo+sapiens">https://www.ncbi.nlm.nih.gov/gene/?term=6772+AND+homo+sapiens</a>   | 1.94 | <b>4.6E-11</b> | 6.6E-09 | <b>PVRIG_High</b> |
| 6614  | SIG-LEC1 | sialic acid binding Ig like lectin 1                      | 20p13   | <a href="https://www.ncbi.nlm.nih.gov/gene/?term=6614+AND+homo+sapiens">https://www.ncbi.nlm.nih.gov/gene/?term=6614+AND+homo+sapiens</a>   | 1.50 | <b>5.3E-11</b> | 7.5E-09 | <b>PVRIG_High</b> |
| 5551  | PRF1     | perforin 1                                                | 10q22.1 | <a href="https://www.ncbi.nlm.nih.gov/gene/?term=5551+AND+homo+sapiens">https://www.ncbi.nlm.nih.gov/gene/?term=5551+AND+homo+sapiens</a>   | 1.71 | <b>7.2E-11</b> | 9.6E-09 | <b>PVRIG_High</b> |
| 3587  | IL10RA   | interleukin 10 receptor subunit alpha                     | 11q23.3 | <a href="https://www.ncbi.nlm.nih.gov/gene/?term=3587+AND+homo+sapiens">https://www.ncbi.nlm.nih.gov/gene/?term=3587+AND+homo+sapiens</a>   | 1.82 | <b>9.4E-11</b> | 1.2E-08 | <b>PVRIG_High</b> |
| 397   | ARHG-DIB | Rho GDP dissociation inhibitor beta                       | 12p12.3 | <a href="https://www.ncbi.nlm.nih.gov/gene/?term=397+AND+homo+sapiens">https://www.ncbi.nlm.nih.gov/gene/?term=397+AND+homo+sapiens</a>     | 1.70 | <b>1.1E-10</b> | 1.4E-08 | <b>PVRIG_High</b> |
| 51237 | MZB1     | marginal zone B and B1 cell specific protein              | 5q31.2  | <a href="https://www.ncbi.nlm.nih.gov/gene/?term=51237+AND+homo+sapiens">https://www.ncbi.nlm.nih.gov/gene/?term=51237+AND+homo+sapiens</a> | 1.70 | <b>1.1E-10</b> | 1.4E-08 | <b>PVRIG_High</b> |
| 56833 | SLAMF8   | SLAM family member 8                                      | 1q23.2  | <a href="https://www.ncbi.nlm.nih.gov/gene/?term=56833+AND+homo+sapiens">https://www.ncbi.nlm.nih.gov/gene/?term=56833+AND+homo+sapiens</a> | 1.75 | <b>1.5E-10</b> | 1.8E-08 | <b>PVRIG_High</b> |
| 64092 | SAMSN1   | SAM domain, SH3 domain and nuclear localization signals 1 | 21q11.2 | <a href="https://www.ncbi.nlm.nih.gov/gene/?term=64092+AND+homo+sapiens">https://www.ncbi.nlm.nih.gov/gene/?term=64092+AND+homo+sapiens</a> | 1.97 | <b>1.5E-10</b> | 1.9E-08 | <b>PVRIG_High</b> |
| 713   | C1QB     | complement C1q B chain                                    | 1p36.12 | <a href="https://www.ncbi.nlm.nih.gov/gene/?term=713+AND+homo+sapiens">https://www.ncbi.nlm.nih.gov/gene/?term=713+AND+homo+sapiens</a>     | 2.17 | <b>1.6E-10</b> | 1.9E-08 | <b>PVRIG_High</b> |
| 7805  | LAPTM5   | lysosomal protein transmembrane 5                         | 1p35.2  | <a href="https://www.ncbi.nlm.nih.gov/gene/?term=7805+AND+homo+sapiens">https://www.ncbi.nlm.nih.gov/gene/?term=7805+AND+homo+sapiens</a>   | 1.91 | <b>1.6E-10</b> | 1.9E-08 | <b>PVRIG_High</b> |
| 9672  | SDC3     | syndecan 3                                                | 1p35.2  | <a href="https://www.ncbi.nlm.nih.gov/gene/?term=9672+AND+homo+sapiens">https://www.ncbi.nlm.nih.gov/gene/?term=9672+AND+homo+sapiens</a>   | 1.55 | <b>1.7E-10</b> | 2.0E-08 | <b>PVRIG_High</b> |
| 915   | CD3D     | CD3d molecule coactosin like F-actin binding              | 11q23.3 | <a href="https://www.ncbi.nlm.nih.gov/gene/?term=915+AND+homo+sapiens">https://www.ncbi.nlm.nih.gov/gene/?term=915+AND+homo+sapiens</a>     | 1.67 | <b>2.4E-10</b> | 2.8E-08 | <b>PVRIG_High</b> |
| 23406 | COTL1    | protein 1                                                 | 16q24.1 | <a href="https://www.ncbi.nlm.nih.gov/gene/?term=23406+AND+homo+sapiens">https://www.ncbi.nlm.nih.gov/gene/?term=23406+AND+homo+sapiens</a> | 1.69 | <b>3.6E-10</b> | 4.1E-08 | <b>PVRIG_High</b> |

|       |           |                                                           |              |                                                                                                                                             |      |                |         |                   |
|-------|-----------|-----------------------------------------------------------|--------------|---------------------------------------------------------------------------------------------------------------------------------------------|------|----------------|---------|-------------------|
| 55340 | GIMAP5    | GTPase, IMAP family member 5                              | 7q36.1       | <a href="https://www.ncbi.nlm.nih.gov/gene/?term=55340+AND+homo+sapiens">https://www.ncbi.nlm.nih.gov/gene/?term=55340+AND+homo+sapiens</a> | 1.64 | <b>7.5E-10</b> | 8.0E-08 | <b>PVRIG_High</b> |
| 60489 | APO-BEC3G | apolipoprotein B mRNA editing enzyme catalytic subunit 3G | 22q13.1      | <a href="https://www.ncbi.nlm.nih.gov/gene/?term=60489+AND+homo+sapiens">https://www.ncbi.nlm.nih.gov/gene/?term=60489+AND+homo+sapiens</a> | 1.87 | <b>9.1E-10</b> | 9.5E-08 | <b>PVRIG_High</b> |
| 7453  | WARS      | tryptophanyl-tRNA synthetase                              | 14q32.2      | <a href="https://www.ncbi.nlm.nih.gov/gene/?term=7453+AND+homo+sapiens">https://www.ncbi.nlm.nih.gov/gene/?term=7453+AND+homo+sapiens</a>   | 1.99 | <b>1.2E-09</b> | 1.2E-07 | <b>PVRIG_High</b> |
| 10875 | FGL2      | fibrinogen like 2                                         | 7q11.23      | <a href="https://www.ncbi.nlm.nih.gov/gene/?term=10875+AND+homo+sapiens">https://www.ncbi.nlm.nih.gov/gene/?term=10875+AND+homo+sapiens</a> | 1.58 | <b>1.3E-09</b> | 1.2E-07 | <b>PVRIG_High</b> |
| 3115  | HLA-DPB1  | major histocompatibility complex, class II, DP beta 1     | 6p21.32      | <a href="https://www.ncbi.nlm.nih.gov/gene/?term=3115+AND+homo+sapiens">https://www.ncbi.nlm.nih.gov/gene/?term=3115+AND+homo+sapiens</a>   | 1.77 | <b>1.8E-09</b> | 1.7E-07 | <b>PVRIG_High</b> |
| 7305  | TYROBP    | TYRO protein tyrosine kinase binding protein              | 19q13.12     | <a href="https://www.ncbi.nlm.nih.gov/gene/?term=7305+AND+homo+sapiens">https://www.ncbi.nlm.nih.gov/gene/?term=7305+AND+homo+sapiens</a>   | 1.82 | <b>2.2E-09</b> | 2.1E-07 | <b>PVRIG_High</b> |
| 1230  | CCR1      | C-C motif chemokine receptor 1                            | 3p21.31      | <a href="https://www.ncbi.nlm.nih.gov/gene/?term=1230+AND+homo+sapiens">https://www.ncbi.nlm.nih.gov/gene/?term=1230+AND+homo+sapiens</a>   | 1.67 | <b>4.9E-09</b> | 4.3E-07 | <b>PVRIG_High</b> |
| 3002  | GZMB      | granzyme B                                                | 14q12        | <a href="https://www.ncbi.nlm.nih.gov/gene/?term=3002+AND+homo+sapiens">https://www.ncbi.nlm.nih.gov/gene/?term=3002+AND+homo+sapiens</a>   | 1.66 | <b>5.5E-09</b> | 4.8E-07 | <b>PVRIG_High</b> |
| 51816 | ADA2      | adenosine deaminase 2                                     | 22q11.1      | <a href="https://www.ncbi.nlm.nih.gov/gene/?term=51816+AND+homo+sapiens">https://www.ncbi.nlm.nih.gov/gene/?term=51816+AND+homo+sapiens</a> | 1.80 | <b>6.8E-09</b> | 5.9E-07 | <b>PVRIG_High</b> |
| 6001  | RGS10     | regulator of G protein signaling 10                       | 10q26.11     | <a href="https://www.ncbi.nlm.nih.gov/gene/?term=6001+AND+homo+sapiens">https://www.ncbi.nlm.nih.gov/gene/?term=6001+AND+homo+sapiens</a>   | 1.72 | <b>7.6E-09</b> | 6.5E-07 | <b>PVRIG_High</b> |
| 9447  | AIM2      | absent in melanoma 2                                      | 1q23.1-q23.2 | <a href="https://www.ncbi.nlm.nih.gov/gene/?term=9447+AND+homo+sapiens">https://www.ncbi.nlm.nih.gov/gene/?term=9447+AND+homo+sapiens</a>   | 1.54 | <b>8.1E-09</b> | 6.9E-07 | <b>PVRIG_High</b> |
| 6890  | TAP1      | transporter 1, ATP binding cassette subfamily B member    | 6p21.32      | <a href="https://www.ncbi.nlm.nih.gov/gene/?term=6890+AND+homo+sapiens">https://www.ncbi.nlm.nih.gov/gene/?term=6890+AND+homo+sapiens</a>   | 1.76 | <b>1.1E-08</b> | 8.7E-07 | <b>PVRIG_High</b> |
| 55843 | ARHGA P15 | Rho GTPase activating protein 15                          | 2q22.2-q22.3 | <a href="https://www.ncbi.nlm.nih.gov/gene/?term=55843+AND+homo+sapiens">https://www.ncbi.nlm.nih.gov/gene/?term=55843+AND+homo+sapiens</a> | 1.51 | <b>1.1E-08</b> | 9.0E-07 | <b>PVRIG_High</b> |

|           |          |                                                          |              |                                                                                                                                                     |      |                |         |                   |
|-----------|----------|----------------------------------------------------------|--------------|-----------------------------------------------------------------------------------------------------------------------------------------------------|------|----------------|---------|-------------------|
| 100132417 | FCGR1CP  | Fc fragment of IgG receptor Ic, pseudogene               | 1q21.1       | <a href="https://www.ncbi.nlm.nih.gov/gene/?term=100132417+AND+homo+sapiens">https://www.ncbi.nlm.nih.gov/gene/?term=100132417+AND+homo+sapiens</a> | 1.67 | <b>1.2E-08</b> | 9.2E-07 | <b>PVRIG_High</b> |
| 64581     | CLEC7A   | C-type lectin domain containing 7A                       | 12p13.2      | <a href="https://www.ncbi.nlm.nih.gov/gene/?term=64581+AND+homo+sapiens">https://www.ncbi.nlm.nih.gov/gene/?term=64581+AND+homo+sapiens</a>         | 1.53 | <b>1.2E-08</b> | 9.6E-07 | <b>PVRIG_High</b> |
| 3659      | IRF1     | interferon regulatory factor 1                           | 5q31.1       | <a href="https://www.ncbi.nlm.nih.gov/gene/?term=3659+AND+homo+sapiens">https://www.ncbi.nlm.nih.gov/gene/?term=3659+AND+homo+sapiens</a>           | 1.59 | <b>1.3E-08</b> | 1.0E-06 | <b>PVRIG_High</b> |
| 3957      | LGALS2   | galectin 2                                               | 22q13.1      | <a href="https://www.ncbi.nlm.nih.gov/gene/?term=3957+AND+homo+sapiens">https://www.ncbi.nlm.nih.gov/gene/?term=3957+AND+homo+sapiens</a>           | 1.51 | <b>1.5E-08</b> | 1.2E-06 | <b>PVRIG_High</b> |
| 3575      | IL7R     | interleukin 7 receptor                                   | 5p13.2       | <a href="https://www.ncbi.nlm.nih.gov/gene/?term=3575+AND+homo+sapiens">https://www.ncbi.nlm.nih.gov/gene/?term=3575+AND+homo+sapiens</a>           | 1.78 | <b>2.0E-08</b> | 1.5E-06 | <b>PVRIG_High</b> |
| 27299     | ADAMDEC1 | ADAM like decysin 1                                      | 8p21.2       | <a href="https://www.ncbi.nlm.nih.gov/gene/?term=27299+AND+homo+sapiens">https://www.ncbi.nlm.nih.gov/gene/?term=27299+AND+homo+sapiens</a>         | 2.00 | <b>2.5E-08</b> | 1.8E-06 | <b>PVRIG_High</b> |
| 4318      | MMP9     | matrix metallo-peptidase 9                               | 20q13.12     | <a href="https://www.ncbi.nlm.nih.gov/gene/?term=4318+AND+homo+sapiens">https://www.ncbi.nlm.nih.gov/gene/?term=4318+AND+homo+sapiens</a>           | 2.13 | <b>2.7E-08</b> | 1.9E-06 | <b>PVRIG_High</b> |
| 6363      | CCL19    | C-C motif chemokine ligand 19                            | 9p13.3       | <a href="https://www.ncbi.nlm.nih.gov/gene/?term=6363+AND+homo+sapiens">https://www.ncbi.nlm.nih.gov/gene/?term=6363+AND+homo+sapiens</a>           | 3.83 | <b>4.4E-08</b> | 3.0E-06 | <b>PVRIG_High</b> |
| 6373      | CXCL11   | C-X-C motif chemokine ligand 11                          | 4q21.1       | <a href="https://www.ncbi.nlm.nih.gov/gene/?term=6373+AND+homo+sapiens">https://www.ncbi.nlm.nih.gov/gene/?term=6373+AND+homo+sapiens</a>           | 2.99 | <b>5.2E-08</b> | 3.5E-06 | <b>PVRIG_High</b> |
| 1536      | CYBB     | cytochrome b-245 beta chain                              | Xp21.1-p11.4 | <a href="https://www.ncbi.nlm.nih.gov/gene/?term=1536+AND+homo+sapiens">https://www.ncbi.nlm.nih.gov/gene/?term=1536+AND+homo+sapiens</a>           | 1.68 | <b>5.3E-08</b> | 3.6E-06 | <b>PVRIG_High</b> |
| 51316     | PLAC8    | placenta specific 8                                      | 4q21.22      | <a href="https://www.ncbi.nlm.nih.gov/gene/?term=51316+AND+homo+sapiens">https://www.ncbi.nlm.nih.gov/gene/?term=51316+AND+homo+sapiens</a>         | 1.97 | <b>5.5E-08</b> | 3.7E-06 | <b>PVRIG_High</b> |
| 25816     | TNFAIP8  | TNF alpha induced protein 8                              | 5q23.1       | <a href="https://www.ncbi.nlm.nih.gov/gene/?term=25816+AND+homo+sapiens">https://www.ncbi.nlm.nih.gov/gene/?term=25816+AND+homo+sapiens</a>         | 1.67 | <b>6.4E-08</b> | 4.2E-06 | <b>PVRIG_High</b> |
| 1439      | CSF2RB   | colony stimulating factor 2 receptor beta common subunit | 22q12.3      | <a href="https://www.ncbi.nlm.nih.gov/gene/?term=1439+AND+homo+sapiens">https://www.ncbi.nlm.nih.gov/gene/?term=1439+AND+homo+sapiens</a>           | 1.93 | <b>8.2E-08</b> | 5.3E-06 | <b>PVRIG_High</b> |
| 3620      | IDO1     | indoleamine 2,3-dioxygenase 1                            | 8p11.21      | <a href="https://www.ncbi.nlm.nih.gov/gene/?term=3620+AND+homo+sapiens">https://www.ncbi.nlm.nih.gov/gene/?term=3620+AND+homo+sapiens</a>           | 1.99 | <b>8.4E-08</b> | 5.4E-06 | <b>PVRIG_High</b> |

|        |          |                                                        |         |                                                                                                                                               |      |                |         |                   |
|--------|----------|--------------------------------------------------------|---------|-----------------------------------------------------------------------------------------------------------------------------------------------|------|----------------|---------|-------------------|
| 5552   | SRGN     | serglycin                                              | 10q22.1 | <a href="https://www.ncbi.nlm.nih.gov/gene/?term=5552+AND+homo+sapiens">https://www.ncbi.nlm.nih.gov/gene/?term=5552+AND+homo+sapiens</a>     | 2.15 | <b>8.5E-08</b> | 5.4E-06 | <b>PVRIG_High</b> |
| 6039   | RNASE6   | ribonuclease A family member k6                        | 14q11.2 | <a href="https://www.ncbi.nlm.nih.gov/gene/?term=6039+AND+homo+sapiens">https://www.ncbi.nlm.nih.gov/gene/?term=6039+AND+homo+sapiens</a>     | 1.53 | <b>1.0E-07</b> | 6.5E-06 | <b>PVRIG_High</b> |
| 474344 | GIMAP6   | GTPase, IMA family member 6                            | 7q36.1  | <a href="https://www.ncbi.nlm.nih.gov/gene/?term=474344+AND+homo+sapiens">https://www.ncbi.nlm.nih.gov/gene/?term=474344+AND+homo+sapiens</a> | 1.52 | <b>1.1E-07</b> | 6.8E-06 | <b>PVRIG_High</b> |
| 6355   | CCL8     | C-C motif chemokine ligand 8                           | 17q12   | <a href="https://www.ncbi.nlm.nih.gov/gene/?term=6355+AND+homo+sapiens">https://www.ncbi.nlm.nih.gov/gene/?term=6355+AND+homo+sapiens</a>     | 1.81 | <b>1.3E-07</b> | 7.8E-06 | <b>PVRIG_High</b> |
| 3113   | HLA-DPA1 | major histocompatibility complex, class II, DP alpha 1 | 6p21.32 | <a href="https://www.ncbi.nlm.nih.gov/gene/?term=3113+AND+homo+sapiens">https://www.ncbi.nlm.nih.gov/gene/?term=3113+AND+homo+sapiens</a>     | 1.86 | <b>1.4E-07</b> | 8.6E-06 | <b>PVRIG_High</b> |
| 3109   | HLA-DMB  | major histocompatibility complex, class II, DM beta    | 6p21.32 | <a href="https://www.ncbi.nlm.nih.gov/gene/?term=3109+AND+homo+sapiens">https://www.ncbi.nlm.nih.gov/gene/?term=3109+AND+homo+sapiens</a>     | 1.54 | <b>1.5E-07</b> | 8.9E-06 | <b>PVRIG_High</b> |
| 10346  | TRIM22   | tripartite motif containing 22                         | 11p15.4 | <a href="https://www.ncbi.nlm.nih.gov/gene/?term=10346+AND+homo+sapiens">https://www.ncbi.nlm.nih.gov/gene/?term=10346+AND+homo+sapiens</a>   | 1.78 | <b>2.0E-07</b> | 1.2E-05 | <b>PVRIG_High</b> |
| 10563  | CXCL13   | C-X-C motif chemokine ligand 13                        | 4q21.1  | <a href="https://www.ncbi.nlm.nih.gov/gene/?term=10563+AND+homo+sapiens">https://www.ncbi.nlm.nih.gov/gene/?term=10563+AND+homo+sapiens</a>   | 1.59 | <b>2.2E-07</b> | 1.3E-05 | <b>PVRIG_High</b> |
| 5996   | RGS1     | regulator of G protein signaling 1                     | 1q31.2  | <a href="https://www.ncbi.nlm.nih.gov/gene/?term=5996+AND+homo+sapiens">https://www.ncbi.nlm.nih.gov/gene/?term=5996+AND+homo+sapiens</a>     | 1.73 | <b>2.2E-07</b> | 1.3E-05 | <b>PVRIG_High</b> |
| 10261  | IGSF6    | immunoglobulin superfamily member 6                    | 16p12.2 | <a href="https://www.ncbi.nlm.nih.gov/gene/?term=10261+AND+homo+sapiens">https://www.ncbi.nlm.nih.gov/gene/?term=10261+AND+homo+sapiens</a>   | 1.56 | <b>3.6E-07</b> | 2.0E-05 | <b>PVRIG_High</b> |
| 7852   | CXCR4    | C-X-C motif chemokine receptor 4                       | 2q22.1  | <a href="https://www.ncbi.nlm.nih.gov/gene/?term=7852+AND+homo+sapiens">https://www.ncbi.nlm.nih.gov/gene/?term=7852+AND+homo+sapiens</a>     | 1.73 | <b>3.8E-07</b> | 2.1E-05 | <b>PVRIG_High</b> |
| 972    | CD74     | CD74 molecule                                          | 5q33.1  | <a href="https://www.ncbi.nlm.nih.gov/gene/?term=972+AND+homo+sapiens">https://www.ncbi.nlm.nih.gov/gene/?term=972+AND+homo+sapiens</a>       | 1.54 | <b>5.8E-07</b> | 3.1E-05 | <b>PVRIG_High</b> |

|       |        |                                                                                                      |          |                                                                                                                                             |      |                |         |                   |
|-------|--------|------------------------------------------------------------------------------------------------------|----------|---------------------------------------------------------------------------------------------------------------------------------------------|------|----------------|---------|-------------------|
| 894   | CCND2  | cyclin D2                                                                                            | 12p13.32 | <a href="https://www.ncbi.nlm.nih.gov/gene/?term=894+AND+homo+sapiens">https://www.ncbi.nlm.nih.gov/gene/?term=894+AND+homo+sapiens</a>     | 1.88 | <b>5.9E-07</b> | 3.1E-05 | <b>PVRIG_High</b> |
| 3600  | IL15   | interleukin 15                                                                                       | 4q31.21  | <a href="https://www.ncbi.nlm.nih.gov/gene/?term=3600+AND+homo+sapiens">https://www.ncbi.nlm.nih.gov/gene/?term=3600+AND+homo+sapiens</a>   | 1.51 | <b>6.7E-07</b> | 3.4E-05 | <b>PVRIG_High</b> |
| 9770  | RASSF2 | Ras association domain family member 2                                                               | 20p13    | <a href="https://www.ncbi.nlm.nih.gov/gene/?term=9770+AND+homo+sapiens">https://www.ncbi.nlm.nih.gov/gene/?term=9770+AND+homo+sapiens</a>   | 1.58 | <b>8.5E-07</b> | 4.3E-05 | <b>PVRIG_High</b> |
| 3627  | CXCL10 | C-X-C motif chemokine ligand 10                                                                      | 4q21.1   | <a href="https://www.ncbi.nlm.nih.gov/gene/?term=3627+AND+homo+sapiens">https://www.ncbi.nlm.nih.gov/gene/?term=3627+AND+homo+sapiens</a>   | 2.38 | <b>8.8E-07</b> | 4.4E-05 | <b>PVRIG_High</b> |
| 6275  | S100A4 | S100 calcium binding protein A4                                                                      | 1q21.3   | <a href="https://www.ncbi.nlm.nih.gov/gene/?term=6275+AND+homo+sapiens">https://www.ncbi.nlm.nih.gov/gene/?term=6275+AND+homo+sapiens</a>   | 2.03 | <b>1.4E-06</b> | 6.8E-05 | <b>PVRIG_High</b> |
| 64231 | MS4A6A | membrane spanning 4-domains A6A                                                                      | 11q12.2  | <a href="https://www.ncbi.nlm.nih.gov/gene/?term=64231+AND+homo+sapiens">https://www.ncbi.nlm.nih.gov/gene/?term=64231+AND+homo+sapiens</a> | 1.60 | <b>1.5E-06</b> | 7.2E-05 | <b>PVRIG_High</b> |
| 10797 | MTHFD2 | methylenetetrahydrofolate dehydrogenase (NADP+ dependent) 2, methenyltetrahydrofolate cyclohydrolase | 2p13.1   | <a href="https://www.ncbi.nlm.nih.gov/gene/?term=10797+AND+homo+sapiens">https://www.ncbi.nlm.nih.gov/gene/?term=10797+AND+homo+sapiens</a> | 2.10 | <b>1.5E-06</b> | 7.2E-05 | <b>PVRIG_High</b> |
| 5698  | PSMB9  | proteasome subunit beta 9                                                                            | 6p21.32  | <a href="https://www.ncbi.nlm.nih.gov/gene/?term=5698+AND+homo+sapiens">https://www.ncbi.nlm.nih.gov/gene/?term=5698+AND+homo+sapiens</a>   | 1.73 | <b>1.8E-06</b> | 8.5E-05 | <b>PVRIG_High</b> |
| 5699  | PSMB10 | proteasome subunit beta 10                                                                           | 16q22.1  | <a href="https://www.ncbi.nlm.nih.gov/gene/?term=5699+AND+homo+sapiens">https://www.ncbi.nlm.nih.gov/gene/?term=5699+AND+homo+sapiens</a>   | 1.64 | <b>2.0E-06</b> | 9.3E-05 | <b>PVRIG_High</b> |
| 2633  | GBP1   | guanylate binding protein 1                                                                          | 1p22.2   | <a href="https://www.ncbi.nlm.nih.gov/gene/?term=2633+AND+homo+sapiens">https://www.ncbi.nlm.nih.gov/gene/?term=2633+AND+homo+sapiens</a>   | 1.87 | <b>2.7E-06</b> | 1.2E-04 | <b>PVRIG_High</b> |
| 9332  | CD163  | CD163 molecule                                                                                       | 12p13.31 | <a href="https://www.ncbi.nlm.nih.gov/gene/?term=9332+AND+homo+sapiens">https://www.ncbi.nlm.nih.gov/gene/?term=9332+AND+homo+sapiens</a>   | 1.62 | <b>3.0E-06</b> | 1.3E-04 | <b>PVRIG_High</b> |

|       |          |                                                       |          |                                                                                                                                             |      |                |         |                   |
|-------|----------|-------------------------------------------------------|----------|---------------------------------------------------------------------------------------------------------------------------------------------|------|----------------|---------|-------------------|
| 3123  | HLA-DRB1 | major histocompatibility complex, class II, DR beta 1 | 6p21.32  | <a href="https://www.ncbi.nlm.nih.gov/gene/?term=3123+AND+homo+sapiens">https://www.ncbi.nlm.nih.gov/gene/?term=3123+AND+homo+sapiens</a>   | 1.79 | <b>3.8E-06</b> | 1.6E-04 | <b>PVRIG_High</b> |
| 6362  | CCL18    | C-C motif chemokine ligand 18                         | 17q12    | <a href="https://www.ncbi.nlm.nih.gov/gene/?term=6362+AND+homo+sapiens">https://www.ncbi.nlm.nih.gov/gene/?term=6362+AND+homo+sapiens</a>   | 1.67 | <b>4.7E-06</b> | 2.0E-04 | <b>PVRIG_High</b> |
| 5272  | SERPINE1 | serpin family B member 9                              | 6p25.2   | <a href="https://www.ncbi.nlm.nih.gov/gene/?term=5272+AND+homo+sapiens">https://www.ncbi.nlm.nih.gov/gene/?term=5272+AND+homo+sapiens</a>   | 1.55 | <b>9.3E-06</b> | 3.6E-04 | <b>PVRIG_High</b> |
| 6347  | CCL2     | C-C motif chemokine ligand 2                          | 17q12    | <a href="https://www.ncbi.nlm.nih.gov/gene/?term=6347+AND+homo+sapiens">https://www.ncbi.nlm.nih.gov/gene/?term=6347+AND+homo+sapiens</a>   | 2.04 | <b>1.4E-05</b> | 5.1E-04 | <b>PVRIG_High</b> |
| 91316 | GUSBP11  | glucuronidase, beta pseudogene 11                     | 22q11.23 | <a href="https://www.ncbi.nlm.nih.gov/gene/?term=91316+AND+homo+sapiens">https://www.ncbi.nlm.nih.gov/gene/?term=91316+AND+homo+sapiens</a> | 1.94 | <b>1.6E-05</b> | 5.5E-04 | <b>PVRIG_High</b> |
| 5920  | RARRES3  | retinoic acid receptor responder 3                    | 11q12.3  | <a href="https://www.ncbi.nlm.nih.gov/gene/?term=5920+AND+homo+sapiens">https://www.ncbi.nlm.nih.gov/gene/?term=5920+AND+homo+sapiens</a>   | 1.54 | <b>1.9E-05</b> | 6.5E-04 | <b>PVRIG_High</b> |
| 3965  | LGALS9   | galectin 9                                            | 17q11.2  | <a href="https://www.ncbi.nlm.nih.gov/gene/?term=3965+AND+homo+sapiens">https://www.ncbi.nlm.nih.gov/gene/?term=3965+AND+homo+sapiens</a>   | 1.50 | <b>2.4E-05</b> | 7.9E-04 | <b>PVRIG_High</b> |
| 4332  | MNDA     | myeloid cell nuclear differentiation antigen          | 1q23.1   | <a href="https://www.ncbi.nlm.nih.gov/gene/?term=4332+AND+homo+sapiens">https://www.ncbi.nlm.nih.gov/gene/?term=4332+AND+homo+sapiens</a>   | 1.53 | <b>3.0E-05</b> | 9.6E-04 | <b>PVRIG_High</b> |
| 8877  | SPHK1    | sphingosine kinase 1                                  | 17q25.1  | <a href="https://www.ncbi.nlm.nih.gov/gene/?term=8877+AND+homo+sapiens">https://www.ncbi.nlm.nih.gov/gene/?term=8877+AND+homo+sapiens</a>   | 1.77 | <b>3.6E-05</b> | 1.1E-03 | <b>PVRIG_High</b> |
| 2207  | FCER1G   | Fc fragment of IgE receptor Ig                        | 1q23.3   | <a href="https://www.ncbi.nlm.nih.gov/gene/?term=2207+AND+homo+sapiens">https://www.ncbi.nlm.nih.gov/gene/?term=2207+AND+homo+sapiens</a>   | 1.51 | <b>4.4E-05</b> | 1.3E-03 | <b>PVRIG_High</b> |
| 8519  | IFITM1   | induced transmembrane protein 1                       | 11p15.5  | <a href="https://www.ncbi.nlm.nih.gov/gene/?term=8519+AND+homo+sapiens">https://www.ncbi.nlm.nih.gov/gene/?term=8519+AND+homo+sapiens</a>   | 1.51 | <b>4.9E-05</b> | 1.4E-03 | <b>PVRIG_High</b> |
| 51338 | MS4A4A   | membrane spanning 4-domains A4A                       | 11q12.2  | <a href="https://www.ncbi.nlm.nih.gov/gene/?term=51338+AND+homo+sapiens">https://www.ncbi.nlm.nih.gov/gene/?term=51338+AND+homo+sapiens</a> | 1.54 | <b>5.3E-05</b> | 1.6E-03 | <b>PVRIG_High</b> |

|       |          |                                                        |          |                                                                                                                                             |      |         |         |            |
|-------|----------|--------------------------------------------------------|----------|---------------------------------------------------------------------------------------------------------------------------------------------|------|---------|---------|------------|
| 3117  | HLA-DQA1 | major histocompatibility complex, class II, DQ alpha 1 | 6p21.32  | <a href="https://www.ncbi.nlm.nih.gov/gene/?term=3117+AND+homo+sapiens">https://www.ncbi.nlm.nih.gov/gene/?term=3117+AND+homo+sapiens</a>   | 2.81 | 5.8E-05 | 1.7E-03 | PVRIG_High |
| 10123 | ARL4C    | ADP ribosylation factor like GTPase 4C                 | 2q37.1   | <a href="https://www.ncbi.nlm.nih.gov/gene/?term=10123+AND+homo+sapiens">https://www.ncbi.nlm.nih.gov/gene/?term=10123+AND+homo+sapiens</a> | 1.54 | 5.9E-05 | 1.7E-03 | PVRIG_High |
| 5360  | PLTP     | phospholipid transfer protein                          | 20q13.12 | <a href="https://www.ncbi.nlm.nih.gov/gene/?term=5360+AND+homo+sapiens">https://www.ncbi.nlm.nih.gov/gene/?term=5360+AND+homo+sapiens</a>   | 1.69 | 7.4E-05 | 2.1E-03 | PVRIG_High |
| 922   | CD5L     | CD5 molecule like                                      | 1q23.1   | <a href="https://www.ncbi.nlm.nih.gov/gene/?term=922+AND+homo+sapiens">https://www.ncbi.nlm.nih.gov/gene/?term=922+AND+homo+sapiens</a>     | 1.62 | 7.5E-05 | 2.1E-03 | PVRIG_High |
| 8826  | IQGAP1   | IQ motif containing GTPase activating protein 1        | 15q26.1  | <a href="https://www.ncbi.nlm.nih.gov/gene/?term=8826+AND+homo+sapiens">https://www.ncbi.nlm.nih.gov/gene/?term=8826+AND+homo+sapiens</a>   | 1.52 | 7.8E-05 | 2.1E-03 | PVRIG_High |
| 11031 | RAB31    | RAB31, member RAS oncogene family                      | 18p11.22 | <a href="https://www.ncbi.nlm.nih.gov/gene/?term=11031+AND+homo+sapiens">https://www.ncbi.nlm.nih.gov/gene/?term=11031+AND+homo+sapiens</a> | 1.55 | 9.2E-05 | 2.4E-03 | PVRIG_High |
| 597   | BCL2A1   | BCL2 related protein A1                                | 15q25.1  | <a href="https://www.ncbi.nlm.nih.gov/gene/?term=597+AND+homo+sapiens">https://www.ncbi.nlm.nih.gov/gene/?term=597+AND+homo+sapiens</a>     | 1.55 | 1.7E-04 | 3.9E-03 | PVRIG_High |
| 8531  | YBX3     | Y-box binding protein 3                                | 12p13.2  | <a href="https://www.ncbi.nlm.nih.gov/gene/?term=8531+AND+homo+sapiens">https://www.ncbi.nlm.nih.gov/gene/?term=8531+AND+homo+sapiens</a>   | 1.79 | 1.7E-04 | 3.9E-03 | PVRIG_High |
| 10964 | IFI44L   | interferon induced protein 44 like                     | 1p31.1   | <a href="https://www.ncbi.nlm.nih.gov/gene/?term=10964+AND+homo+sapiens">https://www.ncbi.nlm.nih.gov/gene/?term=10964+AND+homo+sapiens</a> | 2.04 | 1.8E-04 | 4.0E-03 | PVRIG_High |
| 6366  | CCL21    | C-C motif chemokine ligand 21                          | 9p13.3   | <a href="https://www.ncbi.nlm.nih.gov/gene/?term=6366+AND+homo+sapiens">https://www.ncbi.nlm.nih.gov/gene/?term=6366+AND+homo+sapiens</a>   | 1.54 | 2.4E-04 | 5.0E-03 | PVRIG_High |
| 5734  | PTGER4   | prostaglandin E receptor 4                             | 5p13.1   | <a href="https://www.ncbi.nlm.nih.gov/gene/?term=5734+AND+homo+sapiens">https://www.ncbi.nlm.nih.gov/gene/?term=5734+AND+homo+sapiens</a>   | 1.53 | 2.6E-04 | 5.2E-03 | PVRIG_High |
| 3371  | TNC      | tenascin C                                             | 9q33.1   | <a href="https://www.ncbi.nlm.nih.gov/gene/?term=3371+AND+homo+sapiens">https://www.ncbi.nlm.nih.gov/gene/?term=3371+AND+homo+sapiens</a>   | 2.06 | 2.7E-04 | 5.4E-03 | PVRIG_High |
| 4599  | MX1      | MX dynamin like GTPase 1                               | 21q22.3  | <a href="https://www.ncbi.nlm.nih.gov/gene/?term=4599+AND+homo+sapiens">https://www.ncbi.nlm.nih.gov/gene/?term=4599+AND+homo+sapiens</a>   | 1.50 | 2.8E-04 | 5.5E-03 | PVRIG_High |
| 10457 | GPNMB    | glycoprotein nmb                                       | 7p15.3   | <a href="https://www.ncbi.nlm.nih.gov/gene/?term=10457+AND+homo+sapiens">https://www.ncbi.nlm.nih.gov/gene/?term=10457+AND+homo+sapiens</a> | 1.67 | 3.8E-04 | 6.8E-03 | PVRIG_High |



|       |         |                                                          |          |                                                                                                                                             |      |                |         |                   |
|-------|---------|----------------------------------------------------------|----------|---------------------------------------------------------------------------------------------------------------------------------------------|------|----------------|---------|-------------------|
| 3122  | HLA-DRA | major histocompatibility complex, class II, DR alpha     | 6p21.32  | <a href="https://www.ncbi.nlm.nih.gov/gene/?term=3122+AND+homo+sapiens">https://www.ncbi.nlm.nih.gov/gene/?term=3122+AND+homo+sapiens</a>   | 1.79 | <b>3.9E-04</b> | 6.9E-03 | <b>PVRIG_High</b> |
| 29940 | DSE     | dermatan sulfate epimerase                               | 6q22.1   | <a href="https://www.ncbi.nlm.nih.gov/gene/?term=29940+AND+homo+sapiens">https://www.ncbi.nlm.nih.gov/gene/?term=29940+AND+homo+sapiens</a> | 1.55 | <b>4.7E-04</b> | 7.9E-03 | <b>PVRIG_High</b> |
| 1520  | CTSS    | cathepsin S                                              | 1q21.3   | <a href="https://www.ncbi.nlm.nih.gov/gene/?term=1520+AND+homo+sapiens">https://www.ncbi.nlm.nih.gov/gene/?term=1520+AND+homo+sapiens</a>   | 1.57 | <b>5.9E-04</b> | 9.3E-03 | <b>PVRIG_High</b> |
| 4321  | MMP12   | matrix metallo-peptidase 12                              | 11q22.2  | <a href="https://www.ncbi.nlm.nih.gov/gene/?term=4321+AND+homo+sapiens">https://www.ncbi.nlm.nih.gov/gene/?term=4321+AND+homo+sapiens</a>   | 1.70 | <b>6.9E-04</b> | 1.0E-02 | <b>PVRIG_High</b> |
| 822   | CAPG    | capping actin protein, gelsolin like                     | 2p11.2   | <a href="https://www.ncbi.nlm.nih.gov/gene/?term=822+AND+homo+sapiens">https://www.ncbi.nlm.nih.gov/gene/?term=822+AND+homo+sapiens</a>     | 1.64 | <b>7.2E-04</b> | 1.1E-02 | <b>PVRIG_High</b> |
| 26509 | MYOF    | myoferlin                                                | 10q23.33 | <a href="https://www.ncbi.nlm.nih.gov/gene/?term=26509+AND+homo+sapiens">https://www.ncbi.nlm.nih.gov/gene/?term=26509+AND+homo+sapiens</a> | 2.10 | <b>9.2E-04</b> | 1.3E-02 | <b>PVRIG_High</b> |
| 56925 | LXN     | latexin                                                  | 3q25.32  | <a href="https://www.ncbi.nlm.nih.gov/gene/?term=56925+AND+homo+sapiens">https://www.ncbi.nlm.nih.gov/gene/?term=56925+AND+homo+sapiens</a> | 1.57 | <b>1.4E-03</b> | 1.7E-02 | <b>PVRIG_High</b> |
| 240   | ALOX5   | arachidonate 5-lipoxygenase                              | 10q11.21 | <a href="https://www.ncbi.nlm.nih.gov/gene/?term=240+AND+homo+sapiens">https://www.ncbi.nlm.nih.gov/gene/?term=240+AND+homo+sapiens</a>     | 1.58 | <b>1.5E-03</b> | 1.7E-02 | <b>PVRIG_High</b> |
| 3428  | IFI16   | interferon gamma inducible protein 16                    | 1q23.1   | <a href="https://www.ncbi.nlm.nih.gov/gene/?term=3428+AND+homo+sapiens">https://www.ncbi.nlm.nih.gov/gene/?term=3428+AND+homo+sapiens</a>   | 1.57 | <b>1.7E-03</b> | 1.9E-02 | <b>PVRIG_High</b> |
| 8821  | INPP4B  | inositol polyphosphate-4-phosphatase type II B           | 4q31.21  | <a href="https://www.ncbi.nlm.nih.gov/gene/?term=8821+AND+homo+sapiens">https://www.ncbi.nlm.nih.gov/gene/?term=8821+AND+homo+sapiens</a>   | 1.99 | <b>2.1E-03</b> | 2.2E-02 | <b>PVRIG_High</b> |
| 4053  | LTBP2   | latent transforming growth factor beta binding protein 2 | 14q24.3  | <a href="https://www.ncbi.nlm.nih.gov/gene/?term=4053+AND+homo+sapiens">https://www.ncbi.nlm.nih.gov/gene/?term=4053+AND+homo+sapiens</a>   | 1.51 | <b>2.6E-03</b> | 2.5E-02 | <b>PVRIG_High</b> |
| 57823 | SLAMF7  | SLAM family member 7                                     | 1q23.3   | <a href="https://www.ncbi.nlm.nih.gov/gene/?term=57823+AND+homo+sapiens">https://www.ncbi.nlm.nih.gov/gene/?term=57823+AND+homo+sapiens</a> | 1.54 | <b>2.6E-03</b> | 2.5E-02 | <b>PVRIG_High</b> |
| 3223  | HOXC6   | homeobox C6                                              | 12q13.13 | <a href="https://www.ncbi.nlm.nih.gov/gene/?term=3223+AND+homo+sapiens">https://www.ncbi.nlm.nih.gov/gene/?term=3223+AND+homo+sapiens</a>   | 1.70 | <b>3.1E-03</b> | 2.8E-02 | <b>PVRIG_High</b> |



|       |          |                                                       |          |                                                                                                                                             |       |                |         |                   |
|-------|----------|-------------------------------------------------------|----------|---------------------------------------------------------------------------------------------------------------------------------------------|-------|----------------|---------|-------------------|
| 9547  | CXCL14   | C-X-C motif chemokine ligand 14                       | 5q31.1   | <a href="https://www.ncbi.nlm.nih.gov/gene/?term=9547+AND+homo+sapiens">https://www.ncbi.nlm.nih.gov/gene/?term=9547+AND+homo+sapiens</a>   | 1.64  | <b>3.6E-03</b> | 3.1E-02 | <b>PVRIG_High</b> |
| 2950  | GSTP1    | glutathione S-transferase pi 1                        | 11q13.2  | <a href="https://www.ncbi.nlm.nih.gov/gene/?term=2950+AND+homo+sapiens">https://www.ncbi.nlm.nih.gov/gene/?term=2950+AND+homo+sapiens</a>   | 1.67  | <b>3.6E-03</b> | 3.1E-02 | <b>PVRIG_High</b> |
| 2171  | FABP5    | fatty acid binding protein 5                          | 8q21.13  | <a href="https://www.ncbi.nlm.nih.gov/gene/?term=2171+AND+homo+sapiens">https://www.ncbi.nlm.nih.gov/gene/?term=2171+AND+homo+sapiens</a>   | 1.59  | <b>4.2E-03</b> | 3.4E-02 | <b>PVRIG_High</b> |
| 10512 | SEMA3C   | semaphorin 3C                                         | 7q21.11  | <a href="https://www.ncbi.nlm.nih.gov/gene/?term=10512+AND+homo+sapiens">https://www.ncbi.nlm.nih.gov/gene/?term=10512+AND+homo+sapiens</a> | 1.86  | <b>4.4E-03</b> | 3.5E-02 | <b>PVRIG_High</b> |
| 6387  | CXCL12   | C-X-C motif chemokine ligand 12                       | 10q11.21 | <a href="https://www.ncbi.nlm.nih.gov/gene/?term=6387+AND+homo+sapiens">https://www.ncbi.nlm.nih.gov/gene/?term=6387+AND+homo+sapiens</a>   | 1.59  | <b>4.8E-03</b> | 3.7E-02 | <b>PVRIG_High</b> |
| 165   | AEBP1    | AE binding protein 1                                  | 7p13     | <a href="https://www.ncbi.nlm.nih.gov/gene/?term=165+AND+homo+sapiens">https://www.ncbi.nlm.nih.gov/gene/?term=165+AND+homo+sapiens</a>     | 1.71  | <b>5.2E-03</b> | 3.9E-02 | <b>PVRIG_High</b> |
| 10631 | POSTN    | periostin                                             | 13q13.3  | <a href="https://www.ncbi.nlm.nih.gov/gene/?term=10631+AND+homo+sapiens">https://www.ncbi.nlm.nih.gov/gene/?term=10631+AND+homo+sapiens</a> | 1.79  | <b>5.9E-03</b> | 4.3E-02 | <b>PVRIG_High</b> |
| 8740  | TNFSF14  | TNF superfamily member 14                             | 19p13.3  | <a href="https://www.ncbi.nlm.nih.gov/gene/?term=8740+AND+homo+sapiens">https://www.ncbi.nlm.nih.gov/gene/?term=8740+AND+homo+sapiens</a>   | 1.59  | <b>6.3E-03</b> | 4.5E-02 | <b>PVRIG_High</b> |
| 9023  | CH25H    | cholesterol 25-hydroxylase                            | 10q23.31 | <a href="https://www.ncbi.nlm.nih.gov/gene/?term=9023+AND+homo+sapiens">https://www.ncbi.nlm.nih.gov/gene/?term=9023+AND+homo+sapiens</a>   | 1.65  | <b>6.5E-03</b> | 4.5E-02 | <b>PVRIG_High</b> |
| 2669  | GEM      | GTP binding protein overexpressed in skeletal muscle  | 8q22.1   | <a href="https://www.ncbi.nlm.nih.gov/gene/?term=2669+AND+homo+sapiens">https://www.ncbi.nlm.nih.gov/gene/?term=2669+AND+homo+sapiens</a>   | 2.25  | <b>6.8E-03</b> | 4.6E-02 | <b>PVRIG_High</b> |
| 3119  | HLA-DQB1 | major histocompatibility complex, class II, DQ beta 1 | 6p21.32  | <a href="https://www.ncbi.nlm.nih.gov/gene/?term=3119+AND+homo+sapiens">https://www.ncbi.nlm.nih.gov/gene/?term=3119+AND+homo+sapiens</a>   | 1.67  | <b>7.6E-03</b> | 5.0E-02 | <b>PVRIG_High</b> |
| 1466  | CSRP2    | cysteine and glycine rich protein 2                   | 12q21.2  | <a href="https://www.ncbi.nlm.nih.gov/gene/?term=1466+AND+homo+sapiens">https://www.ncbi.nlm.nih.gov/gene/?term=1466+AND+homo+sapiens</a>   | -1.58 | <b>2.3E-05</b> | 7.8E-04 | <b>PVRIG_Low</b>  |
| 3303  | HSPA1A   | heat shock protein family A                           | 6p21.33  | <a href="https://www.ncbi.nlm.nih.gov/gene/?term=3303+AND+homo+sapiens">https://www.ncbi.nlm.nih.gov/gene/?term=3303+AND+homo+sapiens</a>   | -1.55 | <b>1.5E-04</b> | 3.5E-03 | <b>PVRIG_Low</b>  |

|       |         |                                           |               |                                                                                                                                             |       |         |         |           |
|-------|---------|-------------------------------------------|---------------|---------------------------------------------------------------------------------------------------------------------------------------------|-------|---------|---------|-----------|
|       |         | (Hsp70) member 1A                         |               |                                                                                                                                             |       |         |         |           |
| 3290  | HSD11B1 | hydroxysteroid 11-beta dehydrogenase 1    | 1q32.2        | <a href="https://www.ncbi.nlm.nih.gov/gene/?term=3290+AND+homo+sapiens">https://www.ncbi.nlm.nih.gov/gene/?term=3290+AND+homo+sapiens</a>   | -1.73 | 5.2E-04 | 8.5E-03 | PVRIG_Low |
| 1803  | DPP4    | dipeptidyl peptidase 4                    | 2q24.2        | <a href="https://www.ncbi.nlm.nih.gov/gene/?term=1803+AND+homo+sapiens">https://www.ncbi.nlm.nih.gov/gene/?term=1803+AND+homo+sapiens</a>   | -1.56 | 5.3E-04 | 8.7E-03 | PVRIG_Low |
| 10681 | GNB5    | G protein subunit beta 5                  | 15q21.2       | <a href="https://www.ncbi.nlm.nih.gov/gene/?term=10681+AND+homo+sapiens">https://www.ncbi.nlm.nih.gov/gene/?term=10681+AND+homo+sapiens</a> | -1.69 | 1.1E-03 | 1.4E-02 | PVRIG_Low |
| 23460 | ABCA6   | ATP binding cassette subfamily A member 6 | 17q24.2-q24.3 | <a href="https://www.ncbi.nlm.nih.gov/gene/?term=23460+AND+homo+sapiens">https://www.ncbi.nlm.nih.gov/gene/?term=23460+AND+homo+sapiens</a> | -1.50 | 1.8E-03 | 2.0E-02 | PVRIG_Low |
| 10050 | SLC17A4 | solute carrier family 17 member 4         | 6p22.2        | <a href="https://www.ncbi.nlm.nih.gov/gene/?term=10050+AND+homo+sapiens">https://www.ncbi.nlm.nih.gov/gene/?term=10050+AND+homo+sapiens</a> | -1.50 | 2.0E-03 | 2.1E-02 | PVRIG_Low |
| 23600 | AMACR   | alpha-methylacyl-CoA racemase             | 5p13.2        | <a href="https://www.ncbi.nlm.nih.gov/gene/?term=23600+AND+homo+sapiens">https://www.ncbi.nlm.nih.gov/gene/?term=23600+AND+homo+sapiens</a> | -1.59 | 2.1E-03 | 2.2E-02 | PVRIG_Low |
| 10882 | C1QL1   | complement C1q like 1                     | 17q21.31      | <a href="https://www.ncbi.nlm.nih.gov/gene/?term=10882+AND+homo+sapiens">https://www.ncbi.nlm.nih.gov/gene/?term=10882+AND+homo+sapiens</a> | -1.81 | 2.6E-03 | 2.5E-02 | PVRIG_Low |
| 5313  | PKLR    | pyruvate kinase L/R                       | 1q22          | <a href="https://www.ncbi.nlm.nih.gov/gene/?term=5313+AND+homo+sapiens">https://www.ncbi.nlm.nih.gov/gene/?term=5313+AND+homo+sapiens</a>   | -1.52 | 3.5E-03 | 3.0E-02 | PVRIG_Low |
| 53841 | CDHR5   | cadherin related family member 5          | 11p15.5       | <a href="https://www.ncbi.nlm.nih.gov/gene/?term=53841+AND+homo+sapiens">https://www.ncbi.nlm.nih.gov/gene/?term=53841+AND+homo+sapiens</a> | -1.51 | 3.8E-03 | 3.2E-02 | PVRIG_Low |
| 4311  | MME     | membrane metalloendopeptidase             | 3q25.2        | <a href="https://www.ncbi.nlm.nih.gov/gene/?term=4311+AND+homo+sapiens">https://www.ncbi.nlm.nih.gov/gene/?term=4311+AND+homo+sapiens</a>   | -2.37 | 5.8E-03 | 4.2E-02 | PVRIG_Low |
| 5756  | TWF1    | twinfilin actin binding protein 1         | 12q12         | <a href="https://www.ncbi.nlm.nih.gov/gene/?term=5756+AND+homo+sapiens">https://www.ncbi.nlm.nih.gov/gene/?term=5756+AND+homo+sapiens</a>   | -1.51 | 6.1E-03 | 4.4E-02 | PVRIG_Low |
| 1491  | CTH     | cystathionine gamma-lyase                 | 1p31.1        | <a href="https://www.ncbi.nlm.nih.gov/gene/?term=1491+AND+homo+sapiens">https://www.ncbi.nlm.nih.gov/gene/?term=1491+AND+homo+sapiens</a>   | -1.56 | 6.4E-03 | 4.5E-02 | PVRIG_Low |
| 64388 | GREM2   | gremlin 2, DAN family BMP antagonist      | 1q43          | <a href="https://www.ncbi.nlm.nih.gov/gene/?term=64388+AND+homo+sapiens">https://www.ncbi.nlm.nih.gov/gene/?term=64388+AND+homo+sapiens</a> | -3.01 | 6.4E-03 | 4.5E-02 | PVRIG_Low |

**Table S4.** Ontology analysis of the 181 genes differentially expressed between *PVRIG* High and Low groups in the learning set (GSE14520, n=242)

| GO ID      | Description                                | p-value  | Adjusted p-value | Fold enrichment | GeneRatio | BgRatio   |
|------------|--------------------------------------------|----------|------------------|-----------------|-----------|-----------|
| GO:0050900 | leukocyte migration                        | 1.99E-23 | <b>4.83E-20</b>  | 8.85            | 35/153    | 478/18493 |
| GO:0030595 | leukocyte chemotaxis                       | 6.31E-23 | <b>7.65E-20</b>  | 14.48           | 26/153    | 217/18493 |
| GO:0060326 | cell chemotaxis                            | 1.17E-20 | <b>9.46E-18</b>  | 11.06           | 27/153    | 295/18493 |
| GO:0042110 | T cell activation                          | 5.82E-20 | <b>3.52E-17</b>  | 8.31            | 31/153    | 451/18493 |
| GO:0007159 | leukocyte cell-cell adhesion               | 1.73E-19 | <b>8.36E-17</b>  | 9.98            | 27/153    | 327/18493 |
| GO:0048247 | lymphocyte chemotaxis                      | 2.51E-18 | <b>1.01E-15</b>  | 28.78           | 15/153    | 63/18493  |
| GO:0072676 | lymphocyte migration                       | 1.42E-17 | <b>4.90E-15</b>  | 19.57           | 17/153    | 105/18493 |
| GO:0050863 | regulation of T cell activation            | 6.39E-17 | <b>1.93E-14</b>  | 9.51            | 24/153    | 305/18493 |
| GO:0009615 | response to virus                          | 1.33E-16 | <b>3.57E-14</b>  | 9.21            | 24/153    | 315/18493 |
| GO:0070661 | leukocyte proliferation                    | 1.47E-16 | <b>3.57E-14</b>  | 9.82            | 23/153    | 283/18493 |
| GO:0030593 | neutrophil chemotaxis                      | 1.90E-16 | <b>4.18E-14</b>  | 19.15           | 16/153    | 101/18493 |
| GO:0034341 | response to interferon-gamma               | 2.38E-16 | <b>4.81E-14</b>  | 12.21           | 20/153    | 198/18493 |
| GO:0097529 | myeloid leukocyte migration                | 2.63E-16 | <b>4.90E-14</b>  | 12.15           | 20/153    | 199/18493 |
| GO:1903037 | regulation of leukocyte cell-cell adhesion | 3.16E-16 | <b>5.46E-14</b>  | 9.49            | 23/153    | 293/18493 |
| GO:0071346 | cellular response to interferon-gamma      | 4.96E-16 | <b>8.01E-14</b>  | 12.90           | 19/153    | 178/18493 |
| GO:0002688 | regulation of leukocyte chemotaxis         | 6.69E-16 | <b>1.01E-13</b>  | 17.74           | 16/153    | 109/18493 |

|            |                                                      |          |                 |       |        |           |
|------------|------------------------------------------------------|----------|-----------------|-------|--------|-----------|
| GO:0097530 | granulocyte migration                                | 9.95E-16 | <b>1.41E-13</b> | 15.33 | 17/153 | 134/18493 |
| GO:1990266 | neutrophil migration                                 | 1.05E-15 | <b>1.41E-13</b> | 17.27 | 16/153 | 112/18493 |
| GO:0070663 | regulation of leukocyte proliferation                | 1.30E-15 | <b>1.66E-13</b> | 11.19 | 20/153 | 216/18493 |
| GO:0051249 | regulation of lymphocyte activation                  | 1.86E-15 | <b>2.25E-13</b> | 6.91  | 27/153 | 472/18493 |
| GO:0071621 | granulocyte chemotaxis                               | 3.22E-15 | <b>3.72E-13</b> | 16.12 | 16/153 | 120/18493 |
| GO:0046651 | lymphocyte proliferation                             | 5.21E-15 | <b>5.52E-13</b> | 9.61  | 21/153 | 264/18493 |
| GO:0050870 | positive regulation of T cell activation             | 5.24E-15 | <b>5.52E-13</b> | 11.37 | 19/153 | 202/18493 |
| GO:0032943 | mononuclear cell proliferation                       | 6.06E-15 | <b>6.11E-13</b> | 9.54  | 21/153 | 266/18493 |
| GO:0002690 | positive regulation of leukocyte chemotaxis          | 7.43E-15 | <b>7.19E-13</b> | 20.14 | 14/153 | 84/18493  |
| GO:0002685 | regulation of leukocyte migration                    | 9.70E-15 | <b>9.04E-13</b> | 12.09 | 18/153 | 180/18493 |
| GO:0050920 | regulation of chemotaxis                             | 1.07E-14 | <b>9.63E-13</b> | 10.94 | 19/153 | 210/18493 |
| GO:0070098 | chemokine-mediated signaling pathway                 | 1.24E-14 | <b>1.07E-12</b> | 19.45 | 14/153 | 87/18493  |
| GO:0022407 | regulation of cell-cell adhesion                     | 1.43E-14 | <b>1.20E-12</b> | 7.48  | 24/153 | 388/18493 |
| GO:1903039 | positive regulation of leukocyte cell-cell adhesion  | 1.52E-14 | <b>1.23E-12</b> | 10.73 | 19/153 | 214/18493 |
| GO:0022409 | positive regulation of cell-cell adhesion            | 2.35E-14 | <b>1.84E-12</b> | 9.63  | 20/153 | 251/18493 |
| GO:1990868 | response to chemokine                                | 4.43E-14 | <b>3.25E-12</b> | 17.81 | 14/153 | 95/18493  |
| GO:1990869 | cellular response to chemokine                       | 4.43E-14 | <b>3.25E-12</b> | 17.81 | 14/153 | 95/18493  |
| GO:0002687 | positive regulation of leukocyte migration           | 7.38E-14 | <b>5.26E-12</b> | 14.98 | 15/153 | 121/18493 |
| GO:0050670 | regulation of lymphocyte proliferation               | 9.46E-14 | <b>6.54E-12</b> | 10.61 | 18/153 | 205/18493 |
| GO:0032944 | regulation of mononuclear cell proliferation         | 1.03E-13 | <b>6.90E-12</b> | 10.56 | 18/153 | 206/18493 |
| GO:0050867 | positive regulation of cell activation               | 1.05E-13 | <b>6.90E-12</b> | 7.24  | 23/153 | 384/18493 |
| GO:0042098 | T cell proliferation                                 | 1.20E-13 | <b>7.62E-12</b> | 11.54 | 17/153 | 178/18493 |
| GO:0045785 | positive regulation of cell adhesion                 | 2.12E-13 | <b>1.32E-11</b> | 7.00  | 23/153 | 397/18493 |
| GO:1901623 | regulation of lymphocyte chemotaxis                  | 3.97E-13 | <b>2.40E-11</b> | 41.84 | 9/153  | 26/18493  |
| GO:0002696 | positive regulation of leukocyte activation          | 4.90E-13 | <b>2.89E-11</b> | 7.15  | 22/153 | 372/18493 |
| GO:0032103 | positive regulation of response to external stimulus | 5.59E-13 | <b>3.22E-11</b> | 8.14  | 20/153 | 297/18493 |
| GO:2000401 | regulation of lymphocyte migration                   | 1.72E-12 | <b>9.69E-11</b> | 22.53 | 11/153 | 59/18493  |
| GO:0042129 | regulation of T cell proliferation                   | 2.42E-12 | <b>1.33E-10</b> | 11.85 | 15/153 | 153/18493 |
| GO:0050921 | positive regulation of chemotaxis                    | 3.70E-12 | <b>1.99E-10</b> | 13.02 | 14/153 | 130/18493 |
| GO:0002548 | monocyte chemotaxis                                  | 4.41E-12 | <b>2.32E-10</b> | 20.77 | 11/153 | 64/18493  |

|            |                                                                    |          |                 |       |        |           |
|------------|--------------------------------------------------------------------|----------|-----------------|-------|--------|-----------|
| GO:0001819 | positive regulation of cytokine production                         | 6.00E-12 | <b>3.09E-10</b> | 6.30  | 22/153 | 422/18493 |
| GO:0051607 | defense response to virus                                          | 6.76E-12 | <b>3.41E-10</b> | 9.01  | 17/153 | 228/18493 |
| GO:2000403 | positive regulation of lymphocyte migration                        | 1.11E-11 | <b>5.51E-10</b> | 30.22 | 9/153  | 36/18493  |
| GO:0050852 | T cell receptor signaling pathway                                  | 2.63E-11 | <b>1.27E-09</b> | 11.28 | 14/153 | 150/18493 |
| GO:0051251 | positive regulation of lymphocyte activation                       | 3.98E-11 | <b>1.89E-09</b> | 6.90  | 19/153 | 333/18493 |
| GO:0072678 | T cell migration                                                   | 4.96E-11 | <b>2.31E-09</b> | 20.49 | 10/153 | 59/18493  |
| GO:0002697 | regulation of immune effector process                              | 9.38E-11 | <b>4.28E-09</b> | 5.78  | 21/153 | 439/18493 |
| GO:0030217 | T cell differentiation                                             | 1.06E-10 | <b>4.78E-09</b> | 8.26  | 16/153 | 234/18493 |
| GO:0071674 | mononuclear cell migration                                         | 1.09E-10 | <b>4.81E-09</b> | 15.64 | 11/153 | 85/18493  |
| GO:0071356 | cellular response to tumor necrosis factor                         | 1.13E-10 | <b>4.91E-09</b> | 8.23  | 16/153 | 235/18493 |
| GO:0035747 | natural killer cell chemotaxis                                     | 1.30E-10 | <b>5.51E-09</b> | 65.93 | 6/153  | 11/18493  |
| GO:2000106 | regulation of leukocyte apoptotic process                          | 1.41E-10 | <b>5.90E-09</b> | 15.28 | 11/153 | 87/18493  |
| GO:0019882 | antigen processing and presentation                                | 2.09E-10 | <b>8.58E-09</b> | 9.67  | 14/153 | 175/18493 |
| GO:2000107 | negative regulation of leukocyte apoptotic process                 | 3.24E-10 | <b>1.31E-08</b> | 21.33 | 9/153  | 51/18493  |
| GO:0034612 | response to tumor necrosis factor                                  | 4.26E-10 | <b>1.69E-08</b> | 7.52  | 16/153 | 257/18493 |
| GO:0042102 | positive regulation of T cell proliferation                        | 4.67E-10 | <b>1.83E-08</b> | 13.71 | 11/153 | 97/18493  |
| GO:0050851 | antigen receptor-mediated signaling pathway                        | 4.77E-10 | <b>1.83E-08</b> | 7.47  | 16/153 | 259/18493 |
| GO:0002683 | negative regulation of immune system process                       | 5.90E-10 | <b>2.23E-08</b> | 5.53  | 20/153 | 437/18493 |
| GO:0042119 | neutrophil activation                                              | 9.32E-10 | <b>3.47E-08</b> | 5.10  | 21/153 | 498/18493 |
| GO:0050671 | positive regulation of lymphocyte proliferation                    | 9.91E-10 | <b>3.64E-08</b> | 10.99 | 12/153 | 132/18493 |
| GO:0032946 | positive regulation of mononuclear cell proliferation              | 1.08E-09 | <b>3.91E-08</b> | 10.91 | 12/153 | 133/18493 |
| GO:0071887 | leukocyte apoptotic process                                        | 1.36E-09 | <b>4.83E-08</b> | 12.43 | 11/153 | 107/18493 |
| GO:0002429 | immune response-activating cell surface receptor signaling pathway | 1.57E-09 | <b>5.51E-08</b> | 5.55  | 19/153 | 414/18493 |
| GO:0010818 | T cell chemotaxis                                                  | 1.79E-09 | <b>6.14E-08</b> | 31.34 | 7/153  | 27/18493  |
| GO:0070665 | positive regulation of leukocyte proliferation                     | 1.80E-09 | <b>6.14E-08</b> | 10.43 | 12/153 | 139/18493 |
| GO:0043312 | neutrophil degranulation                                           | 3.55E-09 | <b>1.19E-07</b> | 4.98  | 20/153 | 485/18493 |
| GO:0060333 | interferon-gamma-mediated signaling pathway                        | 3.63E-09 | <b>1.20E-07</b> | 13.43 | 10/153 | 90/18493  |
| GO:0002283 | neutrophil activation involved in immune response                  | 3.94E-09 | <b>1.28E-07</b> | 4.95  | 20/153 | 488/18493 |
| GO:2000406 | positive regulation of T cell migration                            | 4.01E-09 | <b>1.28E-07</b> | 28.20 | 7/153  | 30/18493  |

|            |                                                                                           |          |                 |       |        |           |
|------------|-------------------------------------------------------------------------------------------|----------|-----------------|-------|--------|-----------|
| GO:0002449 | lymphocyte mediated immunity                                                              | 4.02E-09 | <b>1.28E-07</b> | 5.97  | 17/153 | 344/18493 |
| GO:0002768 | immune response-regulating cell surface receptor signaling pathway                        | 5.13E-09 | <b>1.61E-07</b> | 5.16  | 19/153 | 445/18493 |
| GO:1902105 | regulation of leukocyte differentiation                                                   | 5.65E-09 | <b>1.75E-07</b> | 6.84  | 15/153 | 265/18493 |
| GO:0002446 | neutrophil mediated immunity                                                              | 5.75E-09 | <b>1.76E-07</b> | 4.84  | 20/153 | 499/18493 |
| GO:0002478 | antigen processing and presentation of exogenous peptide antigen                          | 7.78E-09 | <b>2.35E-07</b> | 10.55 | 11/153 | 126/18493 |
| GO:0019886 | antigen processing and presentation of exogenous peptide antigen via MHC class II         | 8.40E-09 | <b>2.51E-07</b> | 12.33 | 10/153 | 98/18493  |
| GO:0140131 | positive regulation of lymphocyte chemotaxis                                              | 1.02E-08 | <b>3.02E-07</b> | 36.26 | 6/153  | 20/18493  |
| GO:0002495 | antigen processing and presentation of peptide antigen via MHC class II                   | 1.13E-08 | <b>3.29E-07</b> | 11.97 | 10/153 | 101/18493 |
| GO:0002504 | antigen processing and presentation of peptide or polysaccharide antigen via MHC class II | 1.24E-08 | <b>3.58E-07</b> | 11.85 | 10/153 | 102/18493 |
| GO:0045123 | cellular extravasation                                                                    | 1.38E-08 | <b>3.92E-07</b> | 17.91 | 8/153  | 54/18493  |
| GO:0019884 | antigen processing and presentation of exogenous antigen                                  | 1.49E-08 | <b>4.19E-07</b> | 9.92  | 11/153 | 134/18493 |
| GO:0001909 | leukocyte mediated cytotoxicity                                                           | 1.65E-08 | <b>4.58E-07</b> | 11.51 | 10/153 | 105/18493 |
| GO:0048002 | antigen processing and presentation of peptide antigen                                    | 2.18E-08 | <b>6.00E-07</b> | 9.57  | 11/153 | 139/18493 |
| GO:0070371 | ERK1 and ERK2 cascade                                                                     | 2.45E-08 | <b>6.66E-07</b> | 5.67  | 16/153 | 341/18493 |
| GO:0002407 | dendritic cell chemotaxis                                                                 | 2.61E-08 | <b>7.03E-07</b> | 31.53 | 6/153  | 23/18493  |
| GO:1902107 | positive regulation of leukocyte differentiation                                          | 2.73E-08 | <b>7.25E-07</b> | 9.36  | 11/153 | 142/18493 |
| GO:0030098 | lymphocyte differentiation                                                                | 2.77E-08 | <b>7.28E-07</b> | 5.62  | 16/153 | 344/18493 |
| GO:2000404 | regulation of T cell migration                                                            | 3.43E-08 | <b>8.90E-07</b> | 21.15 | 7/153  | 40/18493  |
| GO:0030101 | natural killer cell activation                                                            | 3.46E-08 | <b>8.90E-07</b> | 12.80 | 9/153  | 85/18493  |
| GO:1903708 | positive regulation of hemopoiesis                                                        | 4.03E-08 | <b>1.03E-06</b> | 7.93  | 12/153 | 183/18493 |
| GO:0036336 | dendritic cell migration                                                                  | 5.84E-08 | <b>1.47E-06</b> | 27.89 | 6/153  | 26/18493  |
| GO:1903706 | regulation of hemopoiesis                                                                 | 7.04E-08 | <b>1.76E-06</b> | 4.92  | 17/153 | 418/18493 |
| GO:0007162 | negative regulation of cell adhesion                                                      | 7.36E-08 | <b>1.82E-06</b> | 6.13  | 14/153 | 276/18493 |
| GO:0070372 | regulation of ERK1 and ERK2 cascade                                                       | 8.18E-08 | <b>2.00E-06</b> | 5.60  | 15/153 | 324/18493 |
| GO:0032680 | regulation of tumor necrosis factor production                                            | 1.02E-07 | <b>2.48E-06</b> | 9.52  | 10/153 | 127/18493 |
| GO:0032640 | tumor necrosis factor production                                                          | 1.18E-07 | <b>2.84E-06</b> | 9.37  | 10/153 | 129/18493 |



|            |                                                                              |          |                 |       |        |           |
|------------|------------------------------------------------------------------------------|----------|-----------------|-------|--------|-----------|
| GO:0070374 | positive regulation of ERK1 and ERK2 cascade                                 | 1.31E-07 | <b>3.10E-06</b> | 6.41  | 13/153 | 245/18493 |
| GO:1903555 | regulation of tumor necrosis factor superfamily cytokine production          | 1.37E-07 | <b>3.22E-06</b> | 9.23  | 10/153 | 131/18493 |
| GO:0010819 | regulation of T cell chemotaxis                                              | 1.47E-07 | <b>3.43E-06</b> | 37.77 | 5/153  | 16/18493  |
| GO:0032760 | positive regulation of tumor necrosis factor production                      | 1.56E-07 | <b>3.59E-06</b> | 13.25 | 8/153  | 73/18493  |
| GO:0002699 | positive regulation of immune effector process                               | 1.73E-07 | <b>3.95E-06</b> | 6.94  | 12/153 | 209/18493 |
| GO:0071706 | tumor necrosis factor superfamily cytokine production                        | 1.82E-07 | <b>4.12E-06</b> | 8.95  | 10/153 | 135/18493 |
| GO:0006874 | cellular calcium ion homeostasis                                             | 1.89E-07 | <b>4.24E-06</b> | 4.59  | 17/153 | 448/18493 |
| GO:0045580 | regulation of T cell differentiation                                         | 2.09E-07 | <b>4.64E-06</b> | 8.82  | 10/153 | 137/18493 |
| GO:1903557 | positive regulation of tumor necrosis factor superfamily cytokine production | 2.14E-07 | <b>4.71E-06</b> | 12.72 | 8/153  | 76/18493  |
| GO:0055074 | calcium ion homeostasis                                                      | 2.83E-07 | <b>6.17E-06</b> | 4.46  | 17/153 | 461/18493 |
| GO:0090026 | positive regulation of monocyte chemotaxis                                   | 2.85E-07 | <b>6.17E-06</b> | 33.57 | 5/153  | 18/18493  |
| GO:0006816 | calcium ion transport                                                        | 3.36E-07 | <b>7.21E-06</b> | 4.68  | 16/153 | 413/18493 |
| GO:0042267 | natural killer cell mediated cytotoxicity                                    | 4.88E-07 | <b>1.04E-05</b> | 14.59 | 7/153  | 58/18493  |
| GO:0072503 | cellular divalent inorganic cation homeostasis                               | 5.43E-07 | <b>1.14E-05</b> | 4.25  | 17/153 | 483/18493 |
| GO:0033622 | integrin activation                                                          | 6.64E-07 | <b>1.39E-05</b> | 28.78 | 5/153  | 21/18493  |
| GO:0002573 | myeloid leukocyte differentiation                                            | 7.58E-07 | <b>1.57E-05</b> | 6.75  | 11/153 | 197/18493 |
| GO:0002228 | natural killer cell mediated immunity                                        | 7.77E-07 | <b>1.59E-05</b> | 13.65 | 7/153  | 62/18493  |
| GO:0001906 | cell killing                                                                 | 7.85E-07 | <b>1.60E-05</b> | 7.65  | 10/153 | 158/18493 |
| GO:0071677 | positive regulation of mononuclear cell migration                            | 8.53E-07 | <b>1.72E-05</b> | 27.47 | 5/153  | 22/18493  |
| GO:0032729 | positive regulation of interferon-gamma production                           | 8.68E-07 | <b>1.74E-05</b> | 13.43 | 7/153  | 63/18493  |
| GO:0097048 | dendritic cell apoptotic process                                             | 9.10E-07 | <b>1.79E-05</b> | 48.35 | 4/153  | 10/18493  |
| GO:2000668 | regulation of dendritic cell apoptotic process                               | 9.10E-07 | <b>1.79E-05</b> | 48.35 | 4/153  | 10/18493  |
| GO:0045621 | positive regulation of lymphocyte differentiation                            | 1.11E-06 | <b>2.18E-05</b> | 10.29 | 8/153  | 94/18493  |
| GO:0045619 | regulation of lymphocyte differentiation                                     | 1.23E-06 | <b>2.39E-05</b> | 7.28  | 10/153 | 166/18493 |
| GO:0070838 | divalent metal ion transport                                                 | 1.36E-06 | <b>2.59E-05</b> | 4.21  | 16/153 | 459/18493 |
| GO:0090025 | regulation of monocyte chemotaxis                                            | 1.36E-06 | <b>2.59E-05</b> | 25.18 | 5/153  | 24/18493  |
| GO:0050663 | cytokine secretion                                                           | 1.42E-06 | <b>2.69E-05</b> | 6.33  | 11/153 | 210/18493 |
| GO:0072511 | divalent inorganic cation transport                                          | 1.48E-06 | <b>2.77E-05</b> | 4.19  | 16/153 | 462/18493 |

|            |                                                            |          |                 |       |        |           |
|------------|------------------------------------------------------------|----------|-----------------|-------|--------|-----------|
| GO:0072677 | eosinophil migration                                       | 1.69E-06 | <b>3.14E-05</b> | 24.17 | 5/153  | 25/18493  |
| GO:0007204 | positive regulation of cytosolic calcium ion concentration | 1.82E-06 | <b>3.36E-05</b> | 5.09  | 13/153 | 309/18493 |
| GO:0002448 | mast cell mediated immunity                                | 2.07E-06 | <b>3.80E-05</b> | 15.77 | 6/153  | 46/18493  |
| GO:0045088 | regulation of innate immune response                       | 2.13E-06 | <b>3.88E-05</b> | 4.64  | 14/153 | 365/18493 |
| GO:0043900 | regulation of multi-organism process                       | 2.58E-06 | <b>4.66E-05</b> | 4.56  | 14/153 | 371/18493 |
| GO:0031349 | positive regulation of defense response                    | 2.69E-06 | <b>4.82E-05</b> | 4.25  | 15/153 | 427/18493 |
| GO:0032496 | response to lipopolysaccharide                             | 3.06E-06 | <b>5.45E-05</b> | 4.85  | 13/153 | 324/18493 |
| GO:0050707 | regulation of cytokine secretion                           | 3.13E-06 | <b>5.53E-05</b> | 6.57  | 10/153 | 184/18493 |
| GO:0002237 | response to molecule of bacterial origin                   | 4.70E-06 | <b>8.25E-05</b> | 4.66  | 13/153 | 337/18493 |
| GO:0070555 | response to interleukin-1                                  | 4.92E-06 | <b>8.57E-05</b> | 7.16  | 9/153  | 152/18493 |
| GO:0051209 | release of sequestered calcium ion into cytosol            | 5.46E-06 | <b>9.36E-05</b> | 8.34  | 8/153  | 116/18493 |
| GO:0051928 | positive regulation of calcium ion transport               | 5.46E-06 | <b>9.36E-05</b> | 8.34  | 8/153  | 116/18493 |
| GO:0002703 | regulation of leukocyte mediated immunity                  | 5.49E-06 | <b>9.36E-05</b> | 6.17  | 10/153 | 196/18493 |
| GO:0045582 | positive regulation of T cell differentiation              | 5.67E-06 | <b>9.57E-05</b> | 10.19 | 7/153  | 83/18493  |
| GO:0001911 | negative regulation of leukocyte mediated cytotoxicity     | 5.73E-06 | <b>9.57E-05</b> | 32.23 | 4/153  | 15/18493  |
| GO:0010820 | positive regulation of T cell chemotaxis                   | 5.73E-06 | <b>9.57E-05</b> | 32.23 | 4/153  | 15/18493  |
| GO:0032735 | positive regulation of interleukin-12 production           | 6.10E-06 | <b>1.01E-04</b> | 18.89 | 5/153  | 32/18493  |
| GO:0051283 | negative regulation of sequestering of calcium ion         | 6.20E-06 | <b>1.02E-04</b> | 8.19  | 8/153  | 118/18493 |
| GO:0002819 | regulation of adaptive immune response                     | 6.40E-06 | <b>1.05E-04</b> | 6.93  | 9/153  | 157/18493 |
| GO:0006959 | humoral immune response                                    | 6.86E-06 | <b>1.12E-04</b> | 4.50  | 13/153 | 349/18493 |
| GO:0051282 | regulation of sequestering of calcium ion                  | 7.02E-06 | <b>1.12E-04</b> | 8.06  | 8/153  | 120/18493 |
| GO:0043547 | positive regulation of GTPase activity                     | 7.06E-06 | <b>1.12E-04</b> | 4.18  | 14/153 | 405/18493 |
| GO:0048872 | homeostasis of number of cells                             | 7.06E-06 | <b>1.12E-04</b> | 5.36  | 11/153 | 248/18493 |
| GO:0051480 | regulation of cytosolic calcium ion concentration          | 7.08E-06 | <b>1.12E-04</b> | 4.49  | 13/153 | 350/18493 |
| GO:0045730 | respiratory burst                                          | 7.15E-06 | <b>1.12E-04</b> | 18.31 | 5/153  | 33/18493  |
| GO:0045576 | mast cell activation                                       | 7.45E-06 | <b>1.16E-04</b> | 12.72 | 6/153  | 57/18493  |
| GO:0031341 | regulation of cell killing                                 | 8.38E-06 | <b>1.29E-04</b> | 9.61  | 7/153  | 88/18493  |
| GO:0050715 | positive regulation of cytokine secretion                  | 8.42E-06 | <b>1.29E-04</b> | 7.86  | 8/153  | 123/18493 |
| GO:0051208 | sequestering of calcium ion                                | 8.42E-06 | <b>1.29E-04</b> | 7.86  | 8/153  | 123/18493 |
| GO:0048525 | negative regulation of viral process                       | 1.05E-05 | <b>1.59E-04</b> | 9.30  | 7/153  | 91/18493  |



|            |                                                  |          |                 |       |        |           |
|------------|--------------------------------------------------|----------|-----------------|-------|--------|-----------|
| GO:0006968 | cellular defense response                        | 1.11E-05 | <b>1.67E-04</b> | 11.89 | 6/153  | 61/18493  |
| GO:0050691 | regulation of defense response to virus by host  | 1.11E-05 | <b>1.67E-04</b> | 16.79 | 5/153  | 36/18493  |
| GO:0043087 | regulation of GTPase activity                    | 1.13E-05 | <b>1.68E-04</b> | 3.77  | 15/153 | 481/18493 |
| GO:0050922 | negative regulation of chemotaxis                | 1.22E-05 | <b>1.81E-04</b> | 11.70 | 6/153  | 62/18493  |
| GO:0031342 | negative regulation of cell killing              | 1.26E-05 | <b>1.86E-04</b> | 26.86 | 4/153  | 18/18493  |
| GO:0071347 | cellular response to interleukin-1               | 1.27E-05 | <b>1.86E-04</b> | 7.44  | 8/153  | 130/18493 |
| GO:0032649 | regulation of interferon-gamma production        | 1.39E-05 | <b>2.03E-04</b> | 8.91  | 7/153  | 95/18493  |
| GO:0097553 | calcium ion transmembrane import into cytosol    | 1.41E-05 | <b>2.05E-04</b> | 7.33  | 8/153  | 132/18493 |
| GO:0032651 | regulation of interleukin-1 beta production      | 1.47E-05 | <b>2.12E-04</b> | 11.33 | 6/153  | 64/18493  |
| GO:0050792 | regulation of viral process                      | 1.68E-05 | <b>2.41E-04</b> | 6.15  | 9/153  | 177/18493 |
| GO:0071496 | cellular response to external stimulus           | 1.87E-05 | <b>2.67E-04</b> | 4.42  | 12/153 | 328/18493 |
| GO:0007520 | myoblast fusion                                  | 1.89E-05 | <b>2.68E-04</b> | 15.11 | 5/153  | 40/18493  |
| GO:1901739 | regulation of myoblast fusion                    | 1.97E-05 | <b>2.77E-04</b> | 24.17 | 4/153  | 20/18493  |
| GO:0071622 | regulation of granulocyte chemotaxis             | 2.41E-05 | <b>3.34E-04</b> | 14.39 | 5/153  | 42/18493  |
| GO:0071675 | regulation of mononuclear cell migration         | 2.41E-05 | <b>3.34E-04</b> | 14.39 | 5/153  | 42/18493  |
| GO:0048245 | eosinophil chemotaxis                            | 2.42E-05 | <b>3.34E-04</b> | 23.02 | 4/153  | 21/18493  |
| GO:0032609 | interferon-gamma production                      | 2.84E-05 | <b>3.91E-04</b> | 7.98  | 7/153  | 106/18493 |
| GO:0001779 | natural killer cell differentiation              | 2.93E-05 | <b>4.00E-04</b> | 21.98 | 4/153  | 22/18493  |
| GO:0002706 | regulation of lymphocyte mediated immunity       | 2.94E-05 | <b>4.00E-04</b> | 6.62  | 8/153  | 146/18493 |
| GO:0043303 | mast cell degranulation                          | 3.04E-05 | <b>4.11E-04</b> | 13.74 | 5/153  | 44/18493  |
| GO:0051924 | regulation of calcium ion transport              | 3.08E-05 | <b>4.14E-04</b> | 5.06  | 10/153 | 239/18493 |
| GO:0032611 | interleukin-1 beta production                    | 3.13E-05 | <b>4.19E-04</b> | 9.93  | 6/153  | 73/18493  |
| GO:0030099 | myeloid cell differentiation                     | 3.30E-05 | <b>4.39E-04</b> | 3.88  | 13/153 | 405/18493 |
| GO:0002279 | mast cell activation involved in immune response | 3.40E-05 | <b>4.45E-04</b> | 13.43 | 5/153  | 45/18493  |
| GO:0002686 | negative regulation of leukocyte migration       | 3.40E-05 | <b>4.45E-04</b> | 13.43 | 5/153  | 45/18493  |
| GO:0060402 | calcium ion transport into cytosol               | 3.40E-05 | <b>4.45E-04</b> | 6.49  | 8/153  | 149/18493 |
| GO:0090023 | positive regulation of neutrophil chemotaxis     | 3.53E-05 | <b>4.60E-04</b> | 21.02 | 4/153  | 23/18493  |
| GO:0070664 | negative regulation of leukocyte proliferation   | 3.66E-05 | <b>4.74E-04</b> | 9.67  | 6/153  | 75/18493  |
| GO:0001910 | regulation of leukocyte mediated cytotoxicity    | 3.94E-05 | <b>5.07E-04</b> | 9.54  | 6/153  | 76/18493  |

|            |                                                                                                                           |          |                 |       |        |           |
|------------|---------------------------------------------------------------------------------------------------------------------------|----------|-----------------|-------|--------|-----------|
| GO:0002460 | adaptive immune response based on somatic recombination of immune receptors built from immunoglobulin superfamily domains | 3.96E-05 | <b>5.07E-04</b> | 4.10  | 12/153 | 354/18493 |
| GO:0032652 | regulation of interleukin-1 production                                                                                    | 4.25E-05 | <b>5.41E-04</b> | 9.42  | 6/153  | 77/18493  |
| GO:0043903 | regulation of symbiosis, encompassing mutualism through parasitism                                                        | 4.95E-05 | <b>6.25E-04</b> | 5.36  | 9/153  | 203/18493 |
| GO:0050901 | leukocyte tethering or rolling                                                                                            | 4.98E-05 | <b>6.25E-04</b> | 19.34 | 4/153  | 25/18493  |
| GO:0071624 | positive regulation of granulocyte chemotaxis                                                                             | 4.98E-05 | <b>6.25E-04</b> | 19.34 | 4/153  | 25/18493  |
| GO:0045089 | positive regulation of innate immune response                                                                             | 5.40E-05 | <b>6.72E-04</b> | 4.30  | 11/153 | 309/18493 |
| GO:0050727 | regulation of inflammatory response                                                                                       | 5.41E-05 | <b>6.72E-04</b> | 3.70  | 13/153 | 425/18493 |
| GO:0008154 | actin polymerization or depolymerization                                                                                  | 5.54E-05 | <b>6.85E-04</b> | 5.28  | 9/153  | 206/18493 |
| GO:0032655 | regulation of interleukin-12 production                                                                                   | 5.70E-05 | <b>7.00E-04</b> | 12.09 | 5/153  | 50/18493  |
| GO:0060142 | regulation of syncytium formation by plasma membrane fusion                                                               | 5.84E-05 | <b>7.11E-04</b> | 18.60 | 4/153  | 26/18493  |
| GO:1902624 | positive regulation of neutrophil migration                                                                               | 5.84E-05 | <b>7.11E-04</b> | 18.60 | 4/153  | 26/18493  |
| GO:0060401 | cytosolic calcium ion transport                                                                                           | 5.89E-05 | <b>7.14E-04</b> | 6.01  | 8/153  | 161/18493 |
| GO:0002468 | dendritic cell antigen processing and presentation                                                                        | 6.39E-05 | <b>7.66E-04</b> | 36.26 | 3/153  | 10/18493  |
| GO:1902713 | regulation of interferon-gamma secretion                                                                                  | 6.39E-05 | <b>7.66E-04</b> | 36.26 | 3/153  | 10/18493  |
| GO:0002695 | negative regulation of leukocyte activation                                                                               | 6.71E-05 | <b>8.01E-04</b> | 5.90  | 8/153  | 164/18493 |
| GO:0032615 | interleukin-12 production                                                                                                 | 6.90E-05 | <b>8.19E-04</b> | 11.62 | 5/153  | 52/18493  |
| GO:1903038 | negative regulation of leukocyte cell-cell adhesion                                                                       | 7.00E-05 | <b>8.26E-04</b> | 6.94  | 7/153  | 122/18493 |
| GO:0000768 | syncytium formation by plasma membrane fusion                                                                             | 7.56E-05 | <b>8.81E-04</b> | 11.40 | 5/153  | 53/18493  |
| GO:0045071 | negative regulation of viral genome replication                                                                           | 7.56E-05 | <b>8.81E-04</b> | 11.40 | 5/153  | 53/18493  |
| GO:0140253 | cell-cell fusion                                                                                                          | 7.56E-05 | <b>8.81E-04</b> | 11.40 | 5/153  | 53/18493  |
| GO:0035456 | response to interferon-beta                                                                                               | 7.90E-05 | <b>9.07E-04</b> | 17.27 | 4/153  | 28/18493  |
| GO:0090022 | regulation of neutrophil chemotaxis                                                                                       | 7.90E-05 | <b>9.07E-04</b> | 17.27 | 4/153  | 28/18493  |
| GO:2000108 | positive regulation of leukocyte apoptotic process                                                                        | 7.90E-05 | <b>9.07E-04</b> | 17.27 | 4/153  | 28/18493  |
| GO:0031295 | T cell costimulation                                                                                                      | 8.28E-05 | <b>9.42E-04</b> | 11.19 | 5/153  | 54/18493  |
| GO:0043901 | negative regulation of multi-organism process                                                                             | 8.29E-05 | <b>9.42E-04</b> | 5.72  | 8/153  | 169/18493 |
| GO:0032612 | interleukin-1 production                                                                                                  | 8.45E-05 | <b>9.57E-04</b> | 8.34  | 6/153  | 87/18493  |

|            |                                                           |          |                 |       |        |           |
|------------|-----------------------------------------------------------|----------|-----------------|-------|--------|-----------|
| GO:0001776 | leukocyte homeostasis                                     | 9.01E-05 | <b>1.01E-03</b> | 8.24  | 6/153  | 88/18493  |
| GO:0006949 | syncytium formation                                       | 9.05E-05 | <b>1.01E-03</b> | 10.99 | 5/153  | 55/18493  |
| GO:0031294 | lymphocyte costimulation                                  | 9.05E-05 | <b>1.01E-03</b> | 10.99 | 5/153  | 55/18493  |
| GO:0050854 | regulation of antigen receptor-mediated signaling pathway | 1.07E-04 | <b>1.19E-03</b> | 10.60 | 5/153  | 57/18493  |
| GO:0070228 | regulation of lymphocyte apoptotic process                | 1.07E-04 | <b>1.19E-03</b> | 10.60 | 5/153  | 57/18493  |
| GO:0042100 | B cell proliferation                                      | 1.09E-04 | <b>1.20E-03</b> | 7.97  | 6/153  | 91/18493  |
| GO:0050777 | negative regulation of immune response                    | 1.10E-04 | <b>1.20E-03</b> | 6.46  | 7/153  | 131/18493 |
| GO:0043122 | regulation of I-kappaB kinase/NF-kappaB signaling         | 1.13E-04 | <b>1.23E-03</b> | 4.81  | 9/153  | 226/18493 |
| GO:0033623 | regulation of integrin activation                         | 1.16E-04 | <b>1.26E-03</b> | 30.22 | 3/153  | 12/18493  |
| GO:0008064 | regulation of actin polymerization or depolymerization    | 1.19E-04 | <b>1.28E-03</b> | 5.43  | 8/153  | 178/18493 |
| GO:0034694 | response to prostaglandin                                 | 1.19E-04 | <b>1.28E-03</b> | 15.60 | 4/153  | 31/18493  |
| GO:1902622 | regulation of neutrophil migration                        | 1.19E-04 | <b>1.28E-03</b> | 15.60 | 4/153  | 31/18493  |
| GO:0030832 | regulation of actin filament length                       | 1.24E-04 | <b>1.32E-03</b> | 5.40  | 8/153  | 179/18493 |
| GO:0046631 | alpha-beta T cell activation                              | 1.26E-04 | <b>1.34E-03</b> | 6.31  | 7/153  | 134/18493 |
| GO:0030888 | regulation of B cell proliferation                        | 1.27E-04 | <b>1.34E-03</b> | 10.24 | 5/153  | 59/18493  |
| GO:0002791 | regulation of peptide secretion                           | 1.33E-04 | <b>1.40E-03</b> | 3.38  | 13/153 | 465/18493 |
| GO:0046633 | alpha-beta T cell proliferation                           | 1.35E-04 | <b>1.42E-03</b> | 15.11 | 4/153  | 32/18493  |
| GO:2000116 | regulation of cysteine-type endopeptidase activity        | 1.37E-04 | <b>1.43E-03</b> | 4.69  | 9/153  | 232/18493 |
| GO:0051250 | negative regulation of lymphocyte activation              | 1.45E-04 | <b>1.51E-03</b> | 6.18  | 7/153  | 137/18493 |
| GO:0001771 | immunological synapse formation                           | 1.49E-04 | <b>1.52E-03</b> | 27.89 | 3/153  | 13/18493  |
| GO:0035723 | interleukin-15-mediated signaling pathway                 | 1.49E-04 | <b>1.52E-03</b> | 27.89 | 3/153  | 13/18493  |
| GO:0045059 | positive thymic T cell selection                          | 1.49E-04 | <b>1.52E-03</b> | 27.89 | 3/153  | 13/18493  |
| GO:0071350 | cellular response to interleukin-15                       | 1.49E-04 | <b>1.52E-03</b> | 27.89 | 3/153  | 13/18493  |
| GO:0050866 | negative regulation of cell activation                    | 1.50E-04 | <b>1.52E-03</b> | 5.26  | 8/153  | 184/18493 |
| GO:0019058 | viral life cycle                                          | 1.50E-04 | <b>1.52E-03</b> | 4.18  | 10/153 | 289/18493 |
| GO:0070229 | negative regulation of lymphocyte apoptotic process       | 1.53E-04 | <b>1.54E-03</b> | 14.65 | 4/153  | 33/18493  |
| GO:1903900 | regulation of viral life cycle                            | 1.66E-04 | <b>1.67E-03</b> | 6.04  | 7/153  | 140/18493 |
| GO:0052548 | regulation of endopeptidase activity                      | 1.86E-04 | <b>1.86E-03</b> | 3.48  | 12/153 | 417/18493 |
| GO:0070234 | positive regulation of T cell apoptotic process           | 1.89E-04 | <b>1.88E-03</b> | 25.90 | 3/153  | 14/18493  |

|            |                                                                         |          |                 |       |        |           |
|------------|-------------------------------------------------------------------------|----------|-----------------|-------|--------|-----------|
| GO:0070672 | response to interleukin-15                                              | 1.89E-04 | <b>1.88E-03</b> | 25.90 | 3/153  | 14/18493  |
| GO:0002707 | negative regulation of lymphocyte mediated immunity                     | 1.93E-04 | <b>1.91E-03</b> | 13.81 | 4/153  | 35/18493  |
| GO:0032418 | lysosome localization                                                   | 2.01E-04 | <b>1.98E-03</b> | 9.30  | 5/153  | 65/18493  |
| GO:0070232 | regulation of T cell apoptotic process                                  | 2.16E-04 | <b>2.12E-03</b> | 13.43 | 4/153  | 36/18493  |
| GO:0061756 | leukocyte adhesion to vascular endothelial cell                         | 2.41E-04 | <b>2.35E-03</b> | 13.07 | 4/153  | 37/18493  |
| GO:0050688 | regulation of defense response to virus                                 | 2.49E-04 | <b>2.42E-03</b> | 8.89  | 5/153  | 68/18493  |
| GO:0031348 | negative regulation of defense response                                 | 2.55E-04 | <b>2.46E-03</b> | 4.86  | 8/153  | 199/18493 |
| GO:0071222 | cellular response to lipopolysaccharide                                 | 2.55E-04 | <b>2.46E-03</b> | 4.86  | 8/153  | 199/18493 |
| GO:0097696 | STAT cascade                                                            | 2.64E-04 | <b>2.54E-03</b> | 5.60  | 7/153  | 151/18493 |
| GO:0033077 | T cell differentiation in thymus                                        | 2.66E-04 | <b>2.55E-03</b> | 8.76  | 5/153  | 69/18493  |
| GO:0032731 | positive regulation of interleukin-1 beta production                    | 2.67E-04 | <b>2.55E-03</b> | 12.72 | 4/153  | 38/18493  |
| GO:1903532 | positive regulation of secretion by cell                                | 2.81E-04 | <b>2.67E-03</b> | 3.56  | 11/153 | 373/18493 |
| GO:1904951 | positive regulation of establishment of protein localization            | 2.86E-04 | <b>2.70E-03</b> | 3.32  | 12/153 | 437/18493 |
| GO:0001818 | negative regulation of cytokine production                              | 2.86E-04 | <b>2.70E-03</b> | 4.25  | 9/153  | 256/18493 |
| GO:0051271 | negative regulation of cellular component movement                      | 2.88E-04 | <b>2.70E-03</b> | 3.55  | 11/153 | 374/18493 |
| GO:0050708 | regulation of protein secretion                                         | 2.92E-04 | <b>2.73E-03</b> | 3.31  | 12/153 | 438/18493 |
| GO:0019932 | second-messenger-mediated signaling                                     | 2.98E-04 | <b>2.77E-03</b> | 3.30  | 12/153 | 439/18493 |
| GO:0009612 | response to mechanical stimulus                                         | 3.02E-04 | <b>2.79E-03</b> | 4.74  | 8/153  | 204/18493 |
| GO:0007249 | I-kappaB kinase/NF-kappaB signaling                                     | 3.03E-04 | <b>2.79E-03</b> | 4.22  | 9/153  | 258/18493 |
| GO:0031668 | cellular response to extracellular stimulus                             | 3.03E-04 | <b>2.79E-03</b> | 4.22  | 9/153  | 258/18493 |
| GO:0061844 | antimicrobial humoral immune response mediated by antimicrobial peptide | 3.05E-04 | <b>2.79E-03</b> | 8.51  | 5/153  | 71/18493  |
| GO:0001959 | regulation of cytokine-mediated signaling pathway                       | 3.09E-04 | <b>2.83E-03</b> | 5.46  | 7/153  | 155/18493 |
| GO:0031334 | positive regulation of protein complex assembly                         | 3.12E-04 | <b>2.84E-03</b> | 4.20  | 9/153  | 259/18493 |
| GO:0052547 | regulation of peptidase activity                                        | 3.17E-04 | <b>2.87E-03</b> | 3.28  | 12/153 | 442/18493 |
| GO:0043270 | positive regulation of ion transport                                    | 3.21E-04 | <b>2.89E-03</b> | 4.18  | 9/153  | 260/18493 |
| GO:0110053 | regulation of actin filament organization                               | 3.21E-04 | <b>2.89E-03</b> | 4.18  | 9/153  | 260/18493 |
| GO:0071219 | cellular response to molecule of bacterial origin                       | 3.22E-04 | <b>2.89E-03</b> | 4.69  | 8/153  | 206/18493 |
| GO:0070227 | lymphocyte apoptotic process                                            | 3.25E-04 | <b>2.91E-03</b> | 8.39  | 5/153  | 72/18493  |

|            |                                                          |          |                 |       |        |           |
|------------|----------------------------------------------------------|----------|-----------------|-------|--------|-----------|
| GO:0002577 | regulation of antigen processing and presentation        | 3.47E-04 | <b>3.07E-03</b> | 21.33 | 3/153  | 17/18493  |
| GO:0048535 | lymph node development                                   | 3.47E-04 | <b>3.07E-03</b> | 21.33 | 3/153  | 17/18493  |
| GO:0072643 | interferon-gamma secretion                               | 3.47E-04 | <b>3.07E-03</b> | 21.33 | 3/153  | 17/18493  |
| GO:0002761 | regulation of myeloid leukocyte differentiation          | 3.72E-04 | <b>3.28E-03</b> | 6.36  | 6/153  | 114/18493 |
| GO:0030336 | negative regulation of cell migration                    | 3.74E-04 | <b>3.28E-03</b> | 3.73  | 10/153 | 324/18493 |
| GO:0040013 | negative regulation of locomotion                        | 3.76E-04 | <b>3.29E-03</b> | 3.44  | 11/153 | 386/18493 |
| GO:0043254 | regulation of protein complex assembly                   | 3.80E-04 | <b>3.31E-03</b> | 3.22  | 12/153 | 451/18493 |
| GO:0018108 | peptidyl-tyrosine phosphorylation                        | 3.84E-04 | <b>3.34E-03</b> | 3.44  | 11/153 | 387/18493 |
| GO:0042269 | regulation of natural killer cell mediated cytotoxicity  | 3.95E-04 | <b>3.40E-03</b> | 11.51 | 4/153  | 42/18493  |
| GO:0043300 | regulation of leukocyte degranulation                    | 3.95E-04 | <b>3.40E-03</b> | 11.51 | 4/153  | 42/18493  |
| GO:0018212 | peptidyl-tyrosine modification                           | 4.10E-04 | <b>3.49E-03</b> | 3.41  | 11/153 | 390/18493 |
| GO:0002544 | chronic inflammatory response                            | 4.14E-04 | <b>3.49E-03</b> | 20.14 | 3/153  | 18/18493  |
| GO:0051767 | nitric-oxide synthase biosynthetic process               | 4.14E-04 | <b>3.49E-03</b> | 20.14 | 3/153  | 18/18493  |
| GO:0051769 | regulation of nitric-oxide synthase biosynthetic process | 4.14E-04 | <b>3.49E-03</b> | 20.14 | 3/153  | 18/18493  |
| GO:0070230 | positive regulation of lymphocyte apoptotic process      | 4.14E-04 | <b>3.49E-03</b> | 20.14 | 3/153  | 18/18493  |
| GO:1901741 | positive regulation of myoblast fusion                   | 4.14E-04 | <b>3.49E-03</b> | 20.14 | 3/153  | 18/18493  |
| GO:0019079 | viral genome replication                                 | 4.27E-04 | <b>3.59E-03</b> | 6.20  | 6/153  | 117/18493 |
| GO:0032956 | regulation of actin cytoskeleton organization            | 4.42E-04 | <b>3.69E-03</b> | 3.65  | 10/153 | 331/18493 |
| GO:0007584 | response to nutrient                                     | 4.42E-04 | <b>3.69E-03</b> | 4.48  | 8/153  | 216/18493 |
| GO:1903901 | negative regulation of viral life cycle                  | 4.44E-04 | <b>3.70E-03</b> | 7.85  | 5/153  | 77/18493  |
| GO:0019730 | antimicrobial humoral response                           | 4.47E-04 | <b>3.71E-03</b> | 6.15  | 6/153  | 118/18493 |
| GO:0060759 | regulation of response to cytokine stimulus              | 4.51E-04 | <b>3.73E-03</b> | 5.13  | 7/153  | 165/18493 |
| GO:0033209 | tumor necrosis factor-mediated signaling pathway         | 4.68E-04 | <b>3.85E-03</b> | 6.09  | 6/153  | 119/18493 |
| GO:0002715 | regulation of natural killer cell mediated immunity      | 4.73E-04 | <b>3.88E-03</b> | 10.99 | 4/153  | 44/18493  |
| GO:0007015 | actin filament organization                              | 4.76E-04 | <b>3.90E-03</b> | 3.35  | 11/153 | 397/18493 |
| GO:0010560 | positive regulation of glycoprotein biosynthetic process | 4.88E-04 | <b>3.98E-03</b> | 19.08 | 3/153  | 19/18493  |
| GO:0002704 | negative regulation of leukocyte mediated immunity       | 5.16E-04 | <b>4.15E-03</b> | 10.74 | 4/153  | 45/18493  |
| GO:0014911 | positive regulation of smooth muscle cell migration      | 5.16E-04 | <b>4.15E-03</b> | 10.74 | 4/153  | 45/18493  |
| GO:0032653 | regulation of interleukin-10 production                  | 5.16E-04 | <b>4.15E-03</b> | 10.74 | 4/153  | 45/18493  |
| GO:0032732 | positive regulation of interleukin-1 production          | 5.16E-04 | <b>4.15E-03</b> | 10.74 | 4/153  | 45/18493  |



|            |                                                                    |          |                 |       |        |           |
|------------|--------------------------------------------------------------------|----------|-----------------|-------|--------|-----------|
| GO:0031589 | cell-substrate adhesion                                            | 5.20E-04 | <b>4.17E-03</b> | 3.58  | 10/153 | 338/18493 |
| GO:0051222 | positive regulation of protein transport                           | 5.29E-04 | <b>4.22E-03</b> | 3.31  | 11/153 | 402/18493 |
| GO:0042116 | macrophage activation                                              | 5.30E-04 | <b>4.22E-03</b> | 7.55  | 5/153  | 80/18493  |
| GO:2000146 | negative regulation of cell motility                               | 5.32E-04 | <b>4.22E-03</b> | 3.57  | 10/153 | 339/18493 |
| GO:0022408 | negative regulation of cell-cell adhesion                          | 5.40E-04 | <b>4.27E-03</b> | 4.98  | 7/153  | 170/18493 |
| GO:0051047 | positive regulation of secretion                                   | 5.51E-04 | <b>4.34E-03</b> | 3.29  | 11/153 | 404/18493 |
| GO:0031952 | regulation of protein autophosphorylation                          | 5.61E-04 | <b>4.40E-03</b> | 10.51 | 4/153  | 46/18493  |
| GO:0045824 | negative regulation of innate immune response                      | 5.61E-04 | <b>4.40E-03</b> | 10.51 | 4/153  | 46/18493  |
| GO:0033630 | positive regulation of cell adhesion mediated by integrin          | 5.71E-04 | <b>4.45E-03</b> | 18.13 | 3/153  | 20/18493  |
| GO:0035458 | cellular response to interferon-beta                               | 5.71E-04 | <b>4.45E-03</b> | 18.13 | 3/153  | 20/18493  |
| GO:1902903 | regulation of supramolecular fiber organization                    | 5.83E-04 | <b>4.52E-03</b> | 3.52  | 10/153 | 343/18493 |
| GO:0032613 | interleukin-10 production                                          | 6.09E-04 | <b>4.70E-03</b> | 10.29 | 4/153  | 47/18493  |
| GO:0150076 | neuroinflammatory response                                         | 6.09E-04 | <b>4.70E-03</b> | 10.29 | 4/153  | 47/18493  |
| GO:0002285 | lymphocyte activation involved in immune response                  | 6.20E-04 | <b>4.76E-03</b> | 4.86  | 7/153  | 174/18493 |
| GO:0014910 | regulation of smooth muscle cell migration                         | 6.27E-04 | <b>4.81E-03</b> | 7.28  | 5/153  | 83/18493  |
| GO:0071216 | cellular response to biotic stimulus                               | 6.50E-04 | <b>4.97E-03</b> | 4.22  | 8/153  | 229/18493 |
| GO:0009409 | response to cold                                                   | 6.60E-04 | <b>4.97E-03</b> | 10.07 | 4/153  | 48/18493  |
| GO:0045058 | T cell selection                                                   | 6.60E-04 | <b>4.97E-03</b> | 10.07 | 4/153  | 48/18493  |
| GO:0045061 | thymic T cell selection                                            | 6.62E-04 | <b>4.97E-03</b> | 17.27 | 3/153  | 21/18493  |
| GO:0050857 | positive regulation of antigen receptor-mediated signaling pathway | 6.62E-04 | <b>4.97E-03</b> | 17.27 | 3/153  | 21/18493  |
| GO:0070233 | negative regulation of T cell apoptotic process                    | 6.62E-04 | <b>4.97E-03</b> | 17.27 | 3/153  | 21/18493  |
| GO:0070542 | response to fatty acid                                             | 6.63E-04 | <b>4.97E-03</b> | 7.19  | 5/153  | 84/18493  |
| GO:0030041 | actin filament polymerization                                      | 7.09E-04 | <b>5.30E-03</b> | 4.75  | 7/153  | 178/18493 |
| GO:0002831 | regulation of response to biotic stimulus                          | 7.46E-04 | <b>5.56E-03</b> | 5.58  | 6/153  | 130/18493 |
| GO:0070231 | T cell apoptotic process                                           | 7.72E-04 | <b>5.73E-03</b> | 9.67  | 4/153  | 50/18493  |
| GO:0002705 | positive regulation of leukocyte mediated immunity                 | 7.77E-04 | <b>5.75E-03</b> | 5.54  | 6/153  | 131/18493 |
| GO:0043123 | positive regulation of I-kappaB kinase/NF-kappaB signaling         | 7.82E-04 | <b>5.78E-03</b> | 4.67  | 7/153  | 181/18493 |
| GO:0002886 | regulation of myeloid leukocyte mediated immunity                  | 8.32E-04 | <b>6.13E-03</b> | 9.48  | 4/153  | 51/18493  |

|            |                                                                            |          |                 |       |        |           |
|------------|----------------------------------------------------------------------------|----------|-----------------|-------|--------|-----------|
| GO:0050729 | positive regulation of inflammatory response                               | 8.41E-04 | <b>6.17E-03</b> | 5.45  | 6/153  | 133/18493 |
| GO:0033273 | response to vitamin                                                        | 8.62E-04 | <b>6.26E-03</b> | 6.79  | 5/153  | 89/18493  |
| GO:0060337 | type I interferon signaling pathway                                        | 8.62E-04 | <b>6.26E-03</b> | 6.79  | 5/153  | 89/18493  |
| GO:0071357 | cellular response to type I interferon                                     | 8.62E-04 | <b>6.26E-03</b> | 6.79  | 5/153  | 89/18493  |
| GO:0002691 | regulation of cellular extravasation                                       | 8.71E-04 | <b>6.26E-03</b> | 15.77 | 3/153  | 23/18493  |
| GO:0032753 | positive regulation of interleukin-4 production                            | 8.71E-04 | <b>6.26E-03</b> | 15.77 | 3/153  | 23/18493  |
| GO:0034695 | response to prostaglandin E                                                | 8.71E-04 | <b>6.26E-03</b> | 15.77 | 3/153  | 23/18493  |
| GO:1903020 | positive regulation of glycoprotein metabolic process                      | 8.71E-04 | <b>6.26E-03</b> | 15.77 | 3/153  | 23/18493  |
| GO:0002763 | positive regulation of myeloid leukocyte differentiation                   | 8.96E-04 | <b>6.42E-03</b> | 9.30  | 4/153  | 52/18493  |
| GO:0014909 | smooth muscle cell migration                                               | 9.07E-04 | <b>6.46E-03</b> | 6.71  | 5/153  | 90/18493  |
| GO:0045069 | regulation of viral genome replication                                     | 9.07E-04 | <b>6.46E-03</b> | 6.71  | 5/153  | 90/18493  |
| GO:0070588 | calcium ion transmembrane transport                                        | 9.39E-04 | <b>6.67E-03</b> | 3.60  | 9/153  | 302/18493 |
| GO:0002702 | positive regulation of production of molecular mediator of immune response | 9.53E-04 | <b>6.69E-03</b> | 6.64  | 5/153  | 91/18493  |
| GO:0045639 | positive regulation of myeloid cell differentiation                        | 9.53E-04 | <b>6.69E-03</b> | 6.64  | 5/153  | 91/18493  |
| GO:0046634 | regulation of alpha-beta T cell activation                                 | 9.53E-04 | <b>6.69E-03</b> | 6.64  | 5/153  | 91/18493  |
| GO:2000117 | negative regulation of cysteine-type endopeptidase activity                | 9.53E-04 | <b>6.69E-03</b> | 6.64  | 5/153  | 91/18493  |
| GO:0042113 | B cell activation                                                          | 9.61E-04 | <b>6.72E-03</b> | 3.59  | 9/153  | 303/18493 |
| GO:0045661 | regulation of myoblast differentiation                                     | 9.63E-04 | <b>6.72E-03</b> | 9.12  | 4/153  | 53/18493  |
| GO:0032535 | regulation of cellular component size                                      | 9.77E-04 | <b>6.80E-03</b> | 3.29  | 10/153 | 367/18493 |
| GO:0060143 | positive regulation of syncytium formation by plasma membrane fusion       | 9.89E-04 | <b>6.87E-03</b> | 15.11 | 3/153  | 24/18493  |
| GO:0050730 | regulation of peptidyl-tyrosine phosphorylation                            | 1.01E-03 | <b>6.97E-03</b> | 3.95  | 8/153  | 245/18493 |
| GO:0050714 | positive regulation of protein secretion                                   | 1.03E-03 | <b>7.13E-03</b> | 3.93  | 8/153  | 246/18493 |
| GO:0045637 | regulation of myeloid cell differentiation                                 | 1.09E-03 | <b>7.49E-03</b> | 3.90  | 8/153  | 248/18493 |
| GO:0034340 | response to type I interferon                                              | 1.10E-03 | <b>7.57E-03</b> | 6.43  | 5/153  | 94/18493  |
| GO:0002230 | positive regulation of defense response to virus by host                   | 1.12E-03 | <b>7.62E-03</b> | 14.50 | 3/153  | 25/18493  |
| GO:0150077 | regulation of neuroinflammatory response                                   | 1.12E-03 | <b>7.62E-03</b> | 14.50 | 3/153  | 25/18493  |
| GO:0010951 | negative regulation of endopeptidase activity                              | 1.15E-03 | <b>7.80E-03</b> | 3.87  | 8/153  | 250/18493 |

|            |                                                                                             |          |                 |       |        |           |
|------------|---------------------------------------------------------------------------------------------|----------|-----------------|-------|--------|-----------|
| GO:0010959 | regulation of metal ion transport                                                           | 1.17E-03 | <b>7.93E-03</b> | 3.21  | 10/153 | 376/18493 |
| GO:0032970 | regulation of actin filament-based process                                                  | 1.17E-03 | <b>7.93E-03</b> | 3.21  | 10/153 | 376/18493 |
| GO:0001960 | negative regulation of cytokine-mediated signaling pathway                                  | 1.18E-03 | <b>7.99E-03</b> | 8.63  | 4/153  | 56/18493  |
| GO:0002218 | activation of innate immune response                                                        | 1.21E-03 | <b>8.11E-03</b> | 3.84  | 8/153  | 252/18493 |
| GO:2001243 | negative regulation of intrinsic apoptotic signaling pathway                                | 1.21E-03 | <b>8.13E-03</b> | 6.30  | 5/153  | 96/18493  |
| GO:0031954 | positive regulation of protein autophosphorylation                                          | 1.26E-03 | <b>8.35E-03</b> | 13.95 | 3/153  | 26/18493  |
| GO:0043950 | positive regulation of cAMP-mediated signaling                                              | 1.26E-03 | <b>8.35E-03</b> | 13.95 | 3/153  | 26/18493  |
| GO:0051125 | regulation of actin nucleation                                                              | 1.26E-03 | <b>8.35E-03</b> | 13.95 | 3/153  | 26/18493  |
| GO:0042108 | positive regulation of cytokine biosynthetic process                                        | 1.27E-03 | <b>8.40E-03</b> | 8.48  | 4/153  | 57/18493  |
| GO:0007187 | G protein-coupled receptor signaling pathway, coupled to cyclic nucleotide second messenger | 1.33E-03 | <b>8.82E-03</b> | 3.78  | 8/153  | 256/18493 |
| GO:0051235 | maintenance of location                                                                     | 1.35E-03 | <b>8.88E-03</b> | 3.42  | 9/153  | 318/18493 |
| GO:0051092 | positive regulation of NF-kappaB transcription factor activity                              | 1.36E-03 | <b>8.96E-03</b> | 4.97  | 6/153  | 146/18493 |
| GO:0007229 | integrin-mediated signaling pathway                                                         | 1.39E-03 | <b>9.13E-03</b> | 6.10  | 5/153  | 99/18493  |
| GO:0032673 | regulation of interleukin-4 production                                                      | 1.40E-03 | <b>9.19E-03</b> | 13.43 | 3/153  | 27/18493  |
| GO:0007259 | JAK-STAT cascade                                                                            | 1.41E-03 | <b>9.21E-03</b> | 4.93  | 6/153  | 147/18493 |
| GO:0034113 | heterotypic cell-cell adhesion                                                              | 1.44E-03 | <b>9.37E-03</b> | 8.19  | 4/153  | 59/18493  |
| GO:0071774 | response to fibroblast growth factor                                                        | 1.46E-03 | <b>9.48E-03</b> | 4.90  | 6/153  | 148/18493 |
| GO:0010466 | negative regulation of peptidase activity                                                   | 1.51E-03 | <b>9.75E-03</b> | 3.70  | 8/153  | 261/18493 |
| GO:0002286 | T cell activation involved in immune response                                               | 1.52E-03 | <b>9.78E-03</b> | 5.98  | 5/153  | 101/18493 |
| GO:0046632 | alpha-beta T cell differentiation                                                           | 1.52E-03 | <b>9.78E-03</b> | 5.98  | 5/153  | 101/18493 |
| GO:0051346 | negative regulation of hydrolase activity                                                   | 1.52E-03 | <b>9.78E-03</b> | 2.90  | 11/153 | 458/18493 |
| GO:0010830 | regulation of myotube differentiation                                                       | 1.53E-03 | <b>9.80E-03</b> | 8.06  | 4/153  | 60/18493  |
| GO:0060761 | negative regulation of response to cytokine stimulus                                        | 1.53E-03 | <b>9.80E-03</b> | 8.06  | 4/153  | 60/18493  |
| GO:0043304 | regulation of mast cell degranulation                                                       | 1.56E-03 | <b>9.96E-03</b> | 12.95 | 3/153  | 28/18493  |
| GO:2001233 | regulation of apoptotic signaling pathway                                                   | 1.57E-03 | <b>9.97E-03</b> | 3.09  | 10/153 | 391/18493 |
| GO:0002456 | T cell mediated immunity                                                                    | 1.59E-03 | <b>1.00E-02</b> | 5.92  | 5/153  | 102/18493 |



|            |                                                                        |          |                 |       |       |           |
|------------|------------------------------------------------------------------------|----------|-----------------|-------|-------|-----------|
| GO:1901222 | regulation of NIK/NF-kappaB signaling                                  | 1.59E-03 | <b>1.00E-02</b> | 5.92  | 5/153 | 102/18493 |
| GO:0046635 | positive regulation of alpha-beta T cell activation                    | 1.63E-03 | <b>1.03E-02</b> | 7.93  | 4/153 | 61/18493  |
| GO:0014812 | muscle cell migration                                                  | 1.66E-03 | <b>1.04E-02</b> | 5.87  | 5/153 | 103/18493 |
| GO:0002793 | positive regulation of peptide secretion                               | 1.66E-03 | <b>1.04E-02</b> | 3.65  | 8/153 | 265/18493 |
| GO:0030168 | platelet activation                                                    | 1.67E-03 | <b>1.05E-02</b> | 4.77  | 6/153 | 152/18493 |
| GO:0032102 | negative regulation of response to external stimulus                   | 1.70E-03 | <b>1.06E-02</b> | 3.31  | 9/153 | 329/18493 |
| GO:0032623 | interleukin-2 production                                               | 1.73E-03 | <b>1.07E-02</b> | 7.80  | 4/153 | 62/18493  |
| GO:0033006 | regulation of mast cell activation involved in immune response         | 1.73E-03 | <b>1.07E-02</b> | 12.50 | 3/153 | 29/18493  |
| GO:0033032 | regulation of myeloid cell apoptotic process                           | 1.73E-03 | <b>1.07E-02</b> | 12.50 | 3/153 | 29/18493  |
| GO:0046640 | regulation of alpha-beta T cell proliferation                          | 1.73E-03 | <b>1.07E-02</b> | 12.50 | 3/153 | 29/18493  |
| GO:0050718 | positive regulation of interleukin-1 beta secretion                    | 1.73E-03 | <b>1.07E-02</b> | 12.50 | 3/153 | 29/18493  |
| GO:0071295 | cellular response to vitamin                                           | 1.73E-03 | <b>1.07E-02</b> | 12.50 | 3/153 | 29/18493  |
| GO:0009266 | response to temperature stimulus                                       | 1.75E-03 | <b>1.07E-02</b> | 4.07  | 7/153 | 208/18493 |
| GO:0010810 | regulation of cell-substrate adhesion                                  | 1.80E-03 | <b>1.10E-02</b> | 4.05  | 7/153 | 209/18493 |
| GO:0002708 | positive regulation of lymphocyte mediated immunity                    | 1.80E-03 | <b>1.10E-02</b> | 5.76  | 5/153 | 105/18493 |
| GO:0002532 | production of molecular mediator involved in inflammatory response     | 1.84E-03 | <b>1.12E-02</b> | 7.67  | 4/153 | 63/18493  |
| GO:0050868 | negative regulation of T cell activation                               | 1.88E-03 | <b>1.14E-02</b> | 5.70  | 5/153 | 106/18493 |
| GO:0032733 | positive regulation of interleukin-10 production                       | 1.91E-03 | <b>1.15E-02</b> | 12.09 | 3/153 | 30/18493  |
| GO:0043372 | positive regulation of CD4-positive, alpha-beta T cell differentiation | 1.91E-03 | <b>1.15E-02</b> | 12.09 | 3/153 | 30/18493  |
| GO:0046596 | regulation of viral entry into host cell                               | 1.91E-03 | <b>1.15E-02</b> | 12.09 | 3/153 | 30/18493  |
| GO:0002260 | lymphocyte homeostasis                                                 | 1.95E-03 | <b>1.17E-02</b> | 7.55  | 4/153 | 64/18493  |
| GO:0031343 | positive regulation of cell killing                                    | 1.95E-03 | <b>1.17E-02</b> | 7.55  | 4/153 | 64/18493  |
| GO:0030833 | regulation of actin filament polymerization                            | 2.03E-03 | <b>1.22E-02</b> | 4.59  | 6/153 | 158/18493 |
| GO:0014902 | myotube differentiation                                                | 2.04E-03 | <b>1.22E-02</b> | 5.60  | 5/153 | 108/18493 |
| GO:0032481 | positive regulation of type I interferon production                    | 2.06E-03 | <b>1.22E-02</b> | 7.44  | 4/153 | 65/18493  |
| GO:0033627 | cell adhesion mediated by integrin                                     | 2.06E-03 | <b>1.22E-02</b> | 7.44  | 4/153 | 65/18493  |
| GO:0051258 | protein polymerization                                                 | 2.09E-03 | <b>1.24E-02</b> | 3.52  | 8/153 | 275/18493 |

|            |                                                                   |          |                 |       |        |           |
|------------|-------------------------------------------------------------------|----------|-----------------|-------|--------|-----------|
| GO:0042554 | superoxide anion generation                                       | 2.11E-03 | <b>1.24E-02</b> | 11.70 | 3/153  | 31/18493  |
| GO:0002292 | T cell differentiation involved in immune response                | 2.18E-03 | <b>1.28E-02</b> | 7.33  | 4/153  | 66/18493  |
| GO:0050918 | positive chemotaxis                                               | 2.18E-03 | <b>1.28E-02</b> | 7.33  | 4/153  | 66/18493  |
| GO:2001242 | regulation of intrinsic apoptotic signaling pathway               | 2.24E-03 | <b>1.31E-02</b> | 4.50  | 6/153  | 161/18493 |
| GO:0019722 | calcium-mediated signaling                                        | 2.40E-03 | <b>1.40E-02</b> | 3.85  | 7/153  | 220/18493 |
| GO:0031670 | cellular response to nutrient                                     | 2.43E-03 | <b>1.42E-02</b> | 7.11  | 4/153  | 68/18493  |
| GO:0001774 | microglial cell activation                                        | 2.53E-03 | <b>1.46E-02</b> | 10.99 | 3/153  | 33/18493  |
| GO:0002269 | leukocyte activation involved in inflammatory response            | 2.53E-03 | <b>1.46E-02</b> | 10.99 | 3/153  | 33/18493  |
| GO:0032633 | interleukin-4 production                                          | 2.53E-03 | <b>1.46E-02</b> | 10.99 | 3/153  | 33/18493  |
| GO:0033028 | myeloid cell apoptotic process                                    | 2.53E-03 | <b>1.46E-02</b> | 10.99 | 3/153  | 33/18493  |
| GO:0032945 | negative regulation of mononuclear cell proliferation             | 2.70E-03 | <b>1.55E-02</b> | 6.91  | 4/153  | 70/18493  |
| GO:0050672 | negative regulation of lymphocyte proliferation                   | 2.70E-03 | <b>1.55E-02</b> | 6.91  | 4/153  | 70/18493  |
| GO:1901224 | positive regulation of NIK/NF-kappaB signaling                    | 2.70E-03 | <b>1.55E-02</b> | 6.91  | 4/153  | 70/18493  |
| GO:0050716 | positive regulation of interleukin-1 secretion                    | 2.75E-03 | <b>1.57E-02</b> | 10.66 | 3/153  | 34/18493  |
| GO:2000249 | regulation of actin cytoskeleton reorganization                   | 2.75E-03 | <b>1.57E-02</b> | 10.66 | 3/153  | 34/18493  |
| GO:2000516 | positive regulation of CD4-positive, alpha-beta T cell activation | 2.75E-03 | <b>1.57E-02</b> | 10.66 | 3/153  | 34/18493  |
| GO:0048660 | regulation of smooth muscle cell proliferation                    | 2.77E-03 | <b>1.57E-02</b> | 4.32  | 6/153  | 168/18493 |
| GO:0051051 | negative regulation of transport                                  | 2.79E-03 | <b>1.58E-02</b> | 2.69  | 11/153 | 495/18493 |
| GO:0001768 | establishment of T cell polarity                                  | 2.93E-03 | <b>1.65E-02</b> | 24.17 | 2/153  | 10/18493  |
| GO:0071104 | response to interleukin-9                                         | 2.93E-03 | <b>1.65E-02</b> | 24.17 | 2/153  | 10/18493  |
| GO:0048659 | smooth muscle cell proliferation                                  | 2.93E-03 | <b>1.65E-02</b> | 4.27  | 6/153  | 170/18493 |
| GO:0033280 | response to vitamin D                                             | 2.99E-03 | <b>1.68E-02</b> | 10.36 | 3/153  | 35/18493  |
| GO:0043368 | positive T cell selection                                         | 2.99E-03 | <b>1.68E-02</b> | 10.36 | 3/153  | 35/18493  |
| GO:0097305 | response to alcohol                                               | 3.15E-03 | <b>1.76E-02</b> | 3.66  | 7/153  | 231/18493 |
| GO:0038061 | NIK/NF-kappaB signaling                                           | 3.23E-03 | <b>1.80E-02</b> | 5.04  | 5/153  | 120/18493 |
| GO:0043367 | CD4-positive, alpha-beta T cell differentiation                   | 3.31E-03 | <b>1.84E-02</b> | 6.53  | 4/153  | 74/18493  |
| GO:0046718 | viral entry into host cell                                        | 3.34E-03 | <b>1.86E-02</b> | 4.99  | 5/153  | 121/18493 |
| GO:0050853 | B cell receptor signaling pathway                                 | 3.46E-03 | <b>1.92E-02</b> | 4.95  | 5/153  | 122/18493 |
| GO:0032642 | regulation of chemokine production                                | 3.47E-03 | <b>1.92E-02</b> | 6.45  | 4/153  | 75/18493  |

|            |                                                                        |          |                 |       |       |           |
|------------|------------------------------------------------------------------------|----------|-----------------|-------|-------|-----------|
| GO:0010831 | positive regulation of myotube differentiation                         | 3.51E-03 | <b>1.93E-02</b> | 9.80  | 3/153 | 37/18493  |
| GO:0038083 | peptidyl-tyrosine autophosphorylation                                  | 3.51E-03 | <b>1.93E-02</b> | 9.80  | 3/153 | 37/18493  |
| GO:0050856 | regulation of T cell receptor signaling pathway                        | 3.51E-03 | <b>1.93E-02</b> | 9.80  | 3/153 | 37/18493  |
| GO:0001767 | establishment of lymphocyte polarity                                   | 3.56E-03 | <b>1.93E-02</b> | 21.98 | 2/153 | 11/18493  |
| GO:0033089 | positive regulation of T cell differentiation in thymus                | 3.56E-03 | <b>1.93E-02</b> | 21.98 | 2/153 | 11/18493  |
| GO:0033632 | regulation of cell-cell adhesion mediated by integrin                  | 3.56E-03 | <b>1.93E-02</b> | 21.98 | 2/153 | 11/18493  |
| GO:0045060 | negative thymic T cell selection                                       | 3.56E-03 | <b>1.93E-02</b> | 21.98 | 2/153 | 11/18493  |
| GO:0045953 | negative regulation of natural killer cell mediated cytotoxicity       | 3.56E-03 | <b>1.93E-02</b> | 21.98 | 2/153 | 11/18493  |
| GO:0072567 | chemokine (C-X-C motif) ligand 2 production                            | 3.56E-03 | <b>1.93E-02</b> | 21.98 | 2/153 | 11/18493  |
| GO:1904995 | negative regulation of leukocyte adhesion to vascular endothelial cell | 3.56E-03 | <b>1.93E-02</b> | 21.98 | 2/153 | 11/18493  |
| GO:0010559 | regulation of glycoprotein biosynthetic process                        | 3.79E-03 | <b>2.04E-02</b> | 9.54  | 3/153 | 38/18493  |
| GO:0019835 | cytolysis                                                              | 4.08E-03 | <b>2.19E-02</b> | 9.30  | 3/153 | 39/18493  |
| GO:0033003 | regulation of mast cell activation                                     | 4.08E-03 | <b>2.19E-02</b> | 9.30  | 3/153 | 39/18493  |
| GO:0043029 | T cell homeostasis                                                     | 4.08E-03 | <b>2.19E-02</b> | 9.30  | 3/153 | 39/18493  |
| GO:0050864 | regulation of B cell activation                                        | 4.21E-03 | <b>2.25E-02</b> | 3.96  | 6/153 | 183/18493 |
| GO:0002551 | mast cell chemotaxis                                                   | 4.25E-03 | <b>2.25E-02</b> | 20.14 | 2/153 | 12/18493  |
| GO:0002716 | negative regulation of natural killer cell mediated immunity           | 4.25E-03 | <b>2.25E-02</b> | 20.14 | 2/153 | 12/18493  |
| GO:0038110 | interleukin-2-mediated signaling pathway                               | 4.25E-03 | <b>2.25E-02</b> | 20.14 | 2/153 | 12/18493  |
| GO:0043383 | negative T cell selection                                              | 4.25E-03 | <b>2.25E-02</b> | 20.14 | 2/153 | 12/18493  |
| GO:0043922 | negative regulation by host of viral transcription                     | 4.25E-03 | <b>2.25E-02</b> | 20.14 | 2/153 | 12/18493  |
| GO:0051279 | regulation of release of sequestered calcium ion into cytosol          | 4.38E-03 | <b>2.29E-02</b> | 6.04  | 4/153 | 80/18493  |
| GO:0002820 | negative regulation of adaptive immune response                        | 4.38E-03 | <b>2.29E-02</b> | 9.07  | 3/153 | 40/18493  |
| GO:0030890 | positive regulation of B cell proliferation                            | 4.38E-03 | <b>2.29E-02</b> | 9.07  | 3/153 | 40/18493  |
| GO:0051281 | positive regulation of release of sequestered calcium ion into cytosol | 4.38E-03 | <b>2.29E-02</b> | 9.07  | 3/153 | 40/18493  |
| GO:0061900 | glial cell activation                                                  | 4.38E-03 | <b>2.29E-02</b> | 9.07  | 3/153 | 40/18493  |
| GO:0045765 | regulation of angiogenesis                                             | 4.51E-03 | <b>2.35E-02</b> | 2.86  | 9/153 | 381/18493 |

|            |                                                                                           |          |                 |       |       |           |
|------------|-------------------------------------------------------------------------------------------|----------|-----------------|-------|-------|-----------|
| GO:0050731 | positive regulation of peptidyl-tyrosine phosphorylation                                  | 4.55E-03 | <b>2.37E-02</b> | 3.90  | 6/153 | 186/18493 |
| GO:0030574 | collagen catabolic process                                                                | 4.70E-03 | <b>2.44E-02</b> | 8.84  | 3/153 | 41/18493  |
| GO:0032602 | chemokine production                                                                      | 4.78E-03 | <b>2.48E-02</b> | 5.90  | 4/153 | 82/18493  |
| GO:0071352 | cellular response to interleukin-2                                                        | 5.00E-03 | <b>2.54E-02</b> | 18.60 | 2/153 | 13/18493  |
| GO:0097531 | mast cell migration                                                                       | 5.00E-03 | <b>2.54E-02</b> | 18.60 | 2/153 | 13/18493  |
| GO:1900025 | negative regulation of substrate adhesion-dependent cell spreading                        | 5.00E-03 | <b>2.54E-02</b> | 18.60 | 2/153 | 13/18493  |
| GO:0002700 | regulation of production of molecular mediator of immune response                         | 5.00E-03 | <b>2.54E-02</b> | 4.54  | 5/153 | 133/18493 |
| GO:0030260 | entry into host cell                                                                      | 5.00E-03 | <b>2.54E-02</b> | 4.54  | 5/153 | 133/18493 |
| GO:0044409 | entry into host                                                                           | 5.00E-03 | <b>2.54E-02</b> | 4.54  | 5/153 | 133/18493 |
| GO:0051806 | entry into cell of other organism involved in symbiotic interaction                       | 5.00E-03 | <b>2.54E-02</b> | 4.54  | 5/153 | 133/18493 |
| GO:0051828 | entry into other organism involved in symbiotic interaction                               | 5.00E-03 | <b>2.54E-02</b> | 4.54  | 5/153 | 133/18493 |
| GO:1904892 | regulation of STAT cascade                                                                | 5.00E-03 | <b>2.54E-02</b> | 4.54  | 5/153 | 133/18493 |
| GO:0045429 | positive regulation of nitric oxide biosynthetic process                                  | 5.03E-03 | <b>2.55E-02</b> | 8.63  | 3/153 | 42/18493  |
| GO:0050706 | regulation of interleukin-1 beta secretion                                                | 5.03E-03 | <b>2.55E-02</b> | 8.63  | 3/153 | 42/18493  |
| GO:1904407 | positive regulation of nitric oxide metabolic process                                     | 5.03E-03 | <b>2.55E-02</b> | 8.63  | 3/153 | 42/18493  |
| GO:0043491 | protein kinase B signaling                                                                | 5.16E-03 | <b>2.61E-02</b> | 3.34  | 7/153 | 253/18493 |
| GO:0007565 | female pregnancy                                                                          | 5.17E-03 | <b>2.61E-02</b> | 3.80  | 6/153 | 191/18493 |
| GO:0043154 | negative regulation of cysteine-type endopeptidase activity involved in apoptotic process | 5.21E-03 | <b>2.61E-02</b> | 5.76  | 4/153 | 84/18493  |
| GO:0097306 | cellular response to alcohol                                                              | 5.21E-03 | <b>2.61E-02</b> | 5.76  | 4/153 | 84/18493  |
| GO:0002792 | negative regulation of peptide secretion                                                  | 5.32E-03 | <b>2.66E-02</b> | 4.48  | 5/153 | 135/18493 |
| GO:0051091 | positive regulation of DNA-binding transcription factor activity                          | 5.39E-03 | <b>2.69E-02</b> | 3.32  | 7/153 | 255/18493 |
| GO:0045445 | myoblast differentiation                                                                  | 5.43E-03 | <b>2.71E-02</b> | 5.69  | 4/153 | 85/18493  |
| GO:0002639 | positive regulation of immunoglobulin production                                          | 5.74E-03 | <b>2.84E-02</b> | 8.24  | 3/153 | 44/18493  |
| GO:0033628 | regulation of cell adhesion mediated by integrin                                          | 5.74E-03 | <b>2.84E-02</b> | 8.24  | 3/153 | 44/18493  |
| GO:0032823 | regulation of natural killer cell differentiation                                         | 5.80E-03 | <b>2.84E-02</b> | 17.27 | 2/153 | 14/18493  |

|            |                                                                           |          |                 |       |        |           |
|------------|---------------------------------------------------------------------------|----------|-----------------|-------|--------|-----------|
| GO:0051770 | positive regulation of nitric-oxide synthase biosynthetic process         | 5.80E-03 | <b>2.84E-02</b> | 17.27 | 2/153  | 14/18493  |
| GO:0060263 | regulation of respiratory burst                                           | 5.80E-03 | <b>2.84E-02</b> | 17.27 | 2/153  | 14/18493  |
| GO:0070669 | response to interleukin-2                                                 | 5.80E-03 | <b>2.84E-02</b> | 17.27 | 2/153  | 14/18493  |
| GO:0071361 | cellular response to ethanol                                              | 5.80E-03 | <b>2.84E-02</b> | 17.27 | 2/153  | 14/18493  |
| GO:2000402 | negative regulation of lymphocyte migration                               | 5.80E-03 | <b>2.84E-02</b> | 17.27 | 2/153  | 14/18493  |
| GO:0048871 | multicellular organismal homeostasis                                      | 5.89E-03 | <b>2.88E-02</b> | 2.57  | 10/153 | 471/18493 |
| GO:0035710 | CD4-positive, alpha-beta T cell activation                                | 5.89E-03 | <b>2.88E-02</b> | 5.56  | 4/153  | 87/18493  |
| GO:0007189 | adenylate cyclase-activating G protein-coupled receptor signaling pathway | 6.01E-03 | <b>2.93E-02</b> | 4.35  | 5/153  | 139/18493 |
| GO:1903018 | regulation of glycoprotein metabolic process                              | 6.11E-03 | <b>2.97E-02</b> | 8.06  | 3/153  | 45/18493  |
| GO:1904894 | positive regulation of STAT cascade                                       | 6.13E-03 | <b>2.98E-02</b> | 5.49  | 4/153  | 88/18493  |
| GO:0043062 | extracellular structure organization                                      | 6.35E-03 | <b>3.07E-02</b> | 2.71  | 9/153  | 402/18493 |
| GO:0045807 | positive regulation of endocytosis                                        | 6.38E-03 | <b>3.08E-02</b> | 4.29  | 5/153  | 141/18493 |
| GO:0044344 | cellular response to fibroblast growth factor stimulus                    | 6.57E-03 | <b>3.16E-02</b> | 4.26  | 5/153  | 142/18493 |
| GO:0106106 | cold-induced thermogenesis                                                | 6.57E-03 | <b>3.16E-02</b> | 4.26  | 5/153  | 142/18493 |
| GO:0120161 | regulation of cold-induced thermogenesis                                  | 6.57E-03 | <b>3.16E-02</b> | 4.26  | 5/153  | 142/18493 |
| GO:0002830 | positive regulation of type 2 immune response                             | 6.65E-03 | <b>3.16E-02</b> | 16.12 | 2/153  | 15/18493  |
| GO:0030852 | regulation of granulocyte differentiation                                 | 6.65E-03 | <b>3.16E-02</b> | 16.12 | 2/153  | 15/18493  |
| GO:0033631 | cell-cell adhesion mediated by integrin                                   | 6.65E-03 | <b>3.16E-02</b> | 16.12 | 2/153  | 15/18493  |
| GO:0050961 | detection of temperature stimulus involved in sensory perception          | 6.65E-03 | <b>3.16E-02</b> | 16.12 | 2/153  | 15/18493  |
| GO:0050965 | detection of temperature stimulus involved in sensory perception of pain  | 6.65E-03 | <b>3.16E-02</b> | 16.12 | 2/153  | 15/18493  |
| GO:2000484 | positive regulation of interleukin-8 secretion                            | 6.65E-03 | <b>3.16E-02</b> | 16.12 | 2/153  | 15/18493  |
| GO:0031667 | response to nutrient levels                                               | 6.79E-03 | <b>3.22E-02</b> | 2.51  | 10/153 | 481/18493 |
| GO:0002720 | positive regulation of cytokine production involved in immune response    | 6.90E-03 | <b>3.25E-02</b> | 7.72  | 3/153  | 47/18493  |
| GO:0043370 | regulation of CD4-positive, alpha-beta T cell differentiation             | 6.90E-03 | <b>3.25E-02</b> | 7.72  | 3/153  | 47/18493  |
| GO:0046638 | positive regulation of alpha-beta T cell differentiation                  | 6.90E-03 | <b>3.25E-02</b> | 7.72  | 3/153  | 47/18493  |

|            |                                                                                                                                         |          |                 |       |        |           |
|------------|-----------------------------------------------------------------------------------------------------------------------------------------|----------|-----------------|-------|--------|-----------|
| GO:0002822 | regulation of adaptive immune response based on somatic recombination of immune receptors built from immunoglobulin superfamily domains | 6.96E-03 | <b>3.27E-02</b> | 4.20  | 5/153  | 144/18493 |
| GO:0002440 | production of molecular mediator of immune response                                                                                     | 7.01E-03 | <b>3.29E-02</b> | 3.16  | 7/153  | 268/18493 |
| GO:1903169 | regulation of calcium ion transmembrane transport                                                                                       | 7.16E-03 | <b>3.35E-02</b> | 4.17  | 5/153  | 145/18493 |
| GO:0050702 | interleukin-1 beta secretion                                                                                                            | 7.32E-03 | <b>3.41E-02</b> | 7.55  | 3/153  | 48/18493  |
| GO:0098586 | cellular response to virus                                                                                                              | 7.32E-03 | <b>3.41E-02</b> | 7.55  | 3/153  | 48/18493  |
| GO:0032930 | positive regulation of superoxide anion generation                                                                                      | 7.56E-03 | <b>3.51E-02</b> | 15.11 | 2/153  | 16/18493  |
| GO:0033033 | negative regulation of myeloid cell apoptotic process                                                                                   | 7.56E-03 | <b>3.51E-02</b> | 15.11 | 2/153  | 16/18493  |
| GO:2001267 | regulation of cysteine-type endopeptidase activity involved in apoptotic signaling pathway                                              | 7.56E-03 | <b>3.51E-02</b> | 15.11 | 2/153  | 16/18493  |
| GO:0006909 | phagocytosis                                                                                                                            | 7.70E-03 | <b>3.56E-02</b> | 2.83  | 8/153  | 342/18493 |
| GO:0042035 | regulation of cytokine biosynthetic process                                                                                             | 7.72E-03 | <b>3.56E-02</b> | 5.14  | 4/153  | 94/18493  |
| GO:0046456 | icosanoid biosynthetic process                                                                                                          | 7.75E-03 | <b>3.56E-02</b> | 7.40  | 3/153  | 49/18493  |
| GO:0050704 | regulation of interleukin-1 secretion                                                                                                   | 7.75E-03 | <b>3.56E-02</b> | 7.40  | 3/153  | 49/18493  |
| GO:0032271 | regulation of protein polymerization                                                                                                    | 7.75E-03 | <b>3.56E-02</b> | 3.49  | 6/153  | 208/18493 |
| GO:1903305 | regulation of regulated secretory pathway                                                                                               | 7.79E-03 | <b>3.57E-02</b> | 4.08  | 5/153  | 148/18493 |
| GO:0043281 | regulation of cysteine-type endopeptidase activity involved in apoptotic process                                                        | 7.93E-03 | <b>3.62E-02</b> | 3.47  | 6/153  | 209/18493 |
| GO:0051701 | interaction with host                                                                                                                   | 7.93E-03 | <b>3.62E-02</b> | 3.47  | 6/153  | 209/18493 |
| GO:0043434 | response to peptide hormone                                                                                                             | 7.98E-03 | <b>3.64E-02</b> | 2.61  | 9/153  | 417/18493 |
| GO:0030316 | osteoclast differentiation                                                                                                              | 8.01E-03 | <b>3.65E-02</b> | 5.09  | 4/153  | 95/18493  |
| GO:0001913 | T cell mediated cytotoxicity                                                                                                            | 8.19E-03 | <b>3.71E-02</b> | 7.25  | 3/153  | 50/18493  |
| GO:0045010 | actin nucleation                                                                                                                        | 8.19E-03 | <b>3.71E-02</b> | 7.25  | 3/153  | 50/18493  |
| GO:0006898 | receptor-mediated endocytosis                                                                                                           | 8.23E-03 | <b>3.72E-02</b> | 2.79  | 8/153  | 346/18493 |
| GO:1990845 | adaptive thermogenesis                                                                                                                  | 8.23E-03 | <b>3.72E-02</b> | 4.03  | 5/153  | 150/18493 |
| GO:0031532 | actin cytoskeleton reorganization                                                                                                       | 8.31E-03 | <b>3.74E-02</b> | 5.04  | 4/153  | 96/18493  |
| GO:0120162 | positive regulation of cold-induced thermogenesis                                                                                       | 8.31E-03 | <b>3.74E-02</b> | 5.04  | 4/153  | 96/18493  |
| GO:0090066 | regulation of anatomical structure size                                                                                                 | 8.46E-03 | <b>3.75E-02</b> | 2.43  | 10/153 | 497/18493 |
| GO:1901342 | regulation of vasculature development                                                                                                   | 8.47E-03 | <b>3.75E-02</b> | 2.58  | 9/153  | 421/18493 |



|            |                                                                                                                                                  |          |                 |             |        |           |
|------------|--------------------------------------------------------------------------------------------------------------------------------------------------|----------|-----------------|-------------|--------|-----------|
| GO:0016064 | immunoglobulin mediated immune response                                                                                                          | 8.48E-03 | <b>3.75E-02</b> | 3.42        | 6/153  | 212/18493 |
| GO:0030198 | extracellular matrix organization                                                                                                                | 8.50E-03 | <b>3.75E-02</b> | 2.78        | 8/153  | 348/18493 |
| GO:0002418 | immune response to tumor cell                                                                                                                    | 8.52E-03 | <b>3.75E-02</b> | 14.22       | 2/153  | 17/18493  |
| GO:0002689 | negative regulation of leukocyte chemotaxis                                                                                                      | 8.52E-03 | <b>3.75E-02</b> | 14.22       | 2/153  | 17/18493  |
| GO:0002710 | negative regulation of T cell mediated immunity                                                                                                  | 8.52E-03 | <b>3.75E-02</b> | 14.22       | 2/153  | 17/18493  |
| GO:0061081 | positive regulation of myeloid leukocyte cytokine production involved in immune response                                                         | 8.52E-03 | <b>3.75E-02</b> | 14.22       | 2/153  | 17/18493  |
| GO:0071605 | monocyte chemotactic protein-1 production                                                                                                        | 8.52E-03 | <b>3.75E-02</b> | 14.22       | 2/153  | 17/18493  |
| GO:0071637 | regulation of monocyte chemotactic protein-1 production                                                                                          | 8.52E-03 | <b>3.75E-02</b> | 14.22       | 2/153  | 17/18493  |
| GO:0090280 | positive regulation of calcium ion import                                                                                                        | 8.52E-03 | <b>3.75E-02</b> | 14.22       | 2/153  | 17/18493  |
| GO:1903978 | regulation of microglial cell activation                                                                                                         | 8.52E-03 | <b>3.75E-02</b> | 14.22       | 2/153  | 17/18493  |
| GO:0060627 | regulation of vesicle-mediated transport                                                                                                         | 8.57E-03 | <b>3.77E-02</b> | 2.427093997 | 10/153 | 498/18493 |
| GO:0007254 | JNK cascade                                                                                                                                      | 8.66E-03 | <b>3.79E-02</b> | 3.40476848  | 6/153  | 213/18493 |
| GO:0019724 | B cell mediated immunity                                                                                                                         | 8.66E-03 | <b>3.79E-02</b> | 3.40        | 6/153  | 213/18493 |
| GO:0030838 | positive regulation of actin filament polymerization                                                                                             | 8.92E-03 | <b>3.89E-02</b> | 4.93        | 4/153  | 98/18493  |
| GO:0048661 | positive regulation of smooth muscle cell proliferation                                                                                          | 8.92E-03 | <b>3.89E-02</b> | 4.93        | 4/153  | 98/18493  |
| GO:2000379 | positive regulation of reactive oxygen species metabolic process                                                                                 | 8.92E-03 | <b>3.89E-02</b> | 4.93        | 4/153  | 98/18493  |
| GO:0032720 | negative regulation of tumor necrosis factor production                                                                                          | 9.13E-03 | <b>3.96E-02</b> | 6.97        | 3/153  | 52/18493  |
| GO:0043030 | regulation of macrophage activation                                                                                                              | 9.13E-03 | <b>3.96E-02</b> | 6.97        | 3/153  | 52/18493  |
| GO:0051403 | stress-activated MAPK cascade                                                                                                                    | 9.49E-03 | <b>4.11E-02</b> | 2.98        | 7/153  | 284/18493 |
| GO:0032816 | positive regulation of natural killer cell activation                                                                                            | 9.54E-03 | <b>4.12E-02</b> | 13.43       | 2/153  | 18/18493  |
| GO:0002824 | positive regulation of adaptive immune response based on somatic recombination of immune receptors built from immunoglobulin superfamily domains | 9.56E-03 | <b>4.12E-02</b> | 4.83        | 4/153  | 100/18493 |
| GO:0010522 | regulation of calcium ion transport into cytosol                                                                                                 | 9.56E-03 | <b>4.12E-02</b> | 4.83        | 4/153  | 100/18493 |
| GO:0031529 | ruffle organization                                                                                                                              | 9.62E-03 | <b>4.12E-02</b> | 6.84        | 3/153  | 53/18493  |
| GO:0032663 | regulation of interleukin-2 production                                                                                                           | 9.62E-03 | <b>4.12E-02</b> | 6.84        | 3/153  | 53/18493  |
| GO:0032722 | positive regulation of chemokine production                                                                                                      | 9.62E-03 | <b>4.12E-02</b> | 6.84        | 3/153  | 53/18493  |
| GO:0097193 | intrinsic apoptotic signaling pathway                                                                                                            | 1.00E-02 | <b>4.28E-02</b> | 2.95        | 7/153  | 287/18493 |

|            |                                                                              |          |                 |       |       |           |
|------------|------------------------------------------------------------------------------|----------|-----------------|-------|-------|-----------|
| GO:0051495 | positive regulation of cytoskeleton organization                             | 1.01E-02 | <b>4.30E-02</b> | 3.30  | 6/153 | 220/18493 |
| GO:0010524 | positive regulation of calcium ion transport into cytosol                    | 1.01E-02 | <b>4.30E-02</b> | 6.71  | 3/153 | 54/18493  |
| GO:0043949 | regulation of cAMP-mediated signaling                                        | 1.01E-02 | <b>4.30E-02</b> | 6.71  | 3/153 | 54/18493  |
| GO:1903556 | negative regulation of tumor necrosis factor superfamily cytokine production | 1.01E-02 | <b>4.30E-02</b> | 6.71  | 3/153 | 54/18493  |
| GO:0045861 | negative regulation of proteolysis                                           | 1.01E-02 | <b>4.30E-02</b> | 2.69  | 8/153 | 359/18493 |
| GO:0008630 | intrinsic apoptotic signaling pathway in response to DNA damage              | 1.02E-02 | <b>4.33E-02</b> | 4.74  | 4/153 | 102/18493 |
| GO:0007188 | adenylate cyclase-modulating G protein-coupled receptor signaling pathway    | 1.03E-02 | <b>4.34E-02</b> | 3.28  | 6/153 | 221/18493 |
| GO:0044706 | multi-multicellular organism process                                         | 1.03E-02 | <b>4.34E-02</b> | 3.28  | 6/153 | 221/18493 |
| GO:0007160 | cell-matrix adhesion                                                         | 1.05E-02 | <b>4.40E-02</b> | 3.27  | 6/153 | 222/18493 |
| GO:0051048 | negative regulation of secretion                                             | 1.05E-02 | <b>4.40E-02</b> | 3.27  | 6/153 | 222/18493 |
| GO:2001234 | negative regulation of apoptotic signaling pathway                           | 1.05E-02 | <b>4.40E-02</b> | 3.27  | 6/153 | 222/18493 |
| GO:0010829 | negative regulation of glucose transmembrane transport                       | 1.06E-02 | <b>4.41E-02</b> | 12.72 | 2/153 | 19/18493  |
| GO:0016048 | detection of temperature stimulus                                            | 1.06E-02 | <b>4.41E-02</b> | 12.72 | 2/153 | 19/18493  |
| GO:0030502 | negative regulation of bone mineralization                                   | 1.06E-02 | <b>4.41E-02</b> | 12.72 | 2/153 | 19/18493  |
| GO:0046641 | positive regulation of alpha-beta T cell proliferation                       | 1.06E-02 | <b>4.41E-02</b> | 12.72 | 2/153 | 19/18493  |
| GO:0050860 | negative regulation of T cell receptor signaling pathway                     | 1.06E-02 | <b>4.41E-02</b> | 12.72 | 2/153 | 19/18493  |
| GO:0090382 | phagosome maturation                                                         | 1.06E-02 | <b>4.41E-02</b> | 12.72 | 2/153 | 19/18493  |
| GO:0001912 | positive regulation of leukocyte mediated cytotoxicity                       | 1.06E-02 | <b>4.41E-02</b> | 6.59  | 3/153 | 55/18493  |
| GO:1903428 | positive regulation of reactive oxygen species biosynthetic process          | 1.06E-02 | <b>4.41E-02</b> | 6.59  | 3/153 | 55/18493  |
| GO:0042130 | negative regulation of T cell proliferation                                  | 1.12E-02 | <b>4.61E-02</b> | 6.48  | 3/153 | 56/18493  |
| GO:0050701 | interleukin-1 secretion                                                      | 1.12E-02 | <b>4.61E-02</b> | 6.48  | 3/153 | 56/18493  |
| GO:0002821 | positive regulation of adaptive immune response                              | 1.13E-02 | <b>4.64E-02</b> | 4.60  | 4/153 | 105/18493 |
| GO:0042089 | cytokine biosynthetic process                                                | 1.13E-02 | <b>4.64E-02</b> | 4.60  | 4/153 | 105/18493 |
| GO:0046777 | protein autophosphorylation                                                  | 1.16E-02 | <b>4.76E-02</b> | 3.19  | 6/153 | 227/18493 |
| GO:0042107 | cytokine metabolic process                                                   | 1.17E-02 | <b>4.76E-02</b> | 4.56  | 4/153 | 106/18493 |
| GO:0031579 | membrane raft organization                                                   | 1.17E-02 | <b>4.76E-02</b> | 12.09 | 2/153 | 20/18493  |



|            |                                                                             |          |                 |       |       |           |
|------------|-----------------------------------------------------------------------------|----------|-----------------|-------|-------|-----------|
| GO:0032682 | negative regulation of chemokine production                                 | 1.17E-02 | <b>4.76E-02</b> | 12.09 | 2/153 | 20/18493  |
| GO:0032928 | regulation of superoxide anion generation                                   | 1.17E-02 | <b>4.76E-02</b> | 12.09 | 2/153 | 20/18493  |
| GO:0071305 | cellular response to vitamin D                                              | 1.17E-02 | <b>4.76E-02</b> | 12.09 | 2/153 | 20/18493  |
| GO:0050766 | positive regulation of phagocytosis                                         | 1.17E-02 | <b>4.76E-02</b> | 6.36  | 3/153 | 57/18493  |
| GO:2000514 | regulation of CD4-positive, alpha-beta T cell activation                    | 1.17E-02 | <b>4.76E-02</b> | 6.36  | 3/153 | 57/18493  |
| GO:0031669 | cellular response to nutrient levels                                        | 1.18E-02 | <b>4.80E-02</b> | 3.18  | 6/153 | 228/18493 |
| GO:0002294 | CD4-positive, alpha-beta T cell differentiation involved in immune response | 1.29E-02 | <b>5.17E-02</b> | 6.15  | 3/153 | 59/18493  |
| GO:0019883 | antigen processing and presentation of endogenous antigen                   | 1.29E-02 | <b>5.17E-02</b> | 11.51 | 2/153 | 21/18493  |
| GO:0043302 | positive regulation of leukocyte degranulation                              | 1.29E-02 | <b>5.17E-02</b> | 11.51 | 2/153 | 21/18493  |
| GO:0050951 | sensory perception of temperature stimulus                                  | 1.29E-02 | <b>5.17E-02</b> | 11.51 | 2/153 | 21/18493  |
| GO:1904994 | regulation of leukocyte adhesion to vascular endothelial cell               | 1.29E-02 | <b>5.17E-02</b> | 11.51 | 2/153 | 21/18493  |
| GO:0051897 | positive regulation of protein kinase B signaling                           | 1.30E-02 | <b>5.21E-02</b> | 3.60  | 5/153 | 168/18493 |
| GO:0002758 | innate immune response-activating signal transduction                       | 1.31E-02 | <b>5.23E-02</b> | 3.11  | 6/153 | 233/18493 |
| GO:0002287 | alpha-beta T cell activation involved in immune response                    | 1.35E-02 | <b>5.37E-02</b> | 6.04  | 3/153 | 60/18493  |
| GO:0002293 | alpha-beta T cell differentiation involved in immune response               | 1.35E-02 | <b>5.37E-02</b> | 6.04  | 3/153 | 60/18493  |
| GO:1903902 | positive regulation of viral life cycle                                     | 1.35E-02 | <b>5.37E-02</b> | 6.04  | 3/153 | 60/18493  |
| GO:0048771 | tissue remodeling                                                           | 1.36E-02 | <b>5.40E-02</b> | 3.55  | 5/153 | 170/18493 |
| GO:2001235 | positive regulation of apoptotic signaling pathway                          | 1.36E-02 | <b>5.40E-02</b> | 3.55  | 5/153 | 170/18493 |
| GO:0002698 | negative regulation of immune effector process                              | 1.36E-02 | <b>5.40E-02</b> | 4.36  | 4/153 | 111/18493 |
| GO:0033002 | muscle cell proliferation                                                   | 1.38E-02 | <b>5.48E-02</b> | 3.07  | 6/153 | 236/18493 |
| GO:0001503 | ossification                                                                | 1.39E-02 | <b>5.49E-02</b> | 2.54  | 8/153 | 380/18493 |
| GO:0001659 | temperature homeostasis                                                     | 1.39E-02 | <b>5.50E-02</b> | 3.53  | 5/153 | 171/18493 |
| GO:0002347 | response to tumor cell                                                      | 1.41E-02 | <b>5.50E-02</b> | 10.99 | 2/153 | 22/18493  |
| GO:0006925 | inflammatory cell apoptotic process                                         | 1.41E-02 | <b>5.50E-02</b> | 10.99 | 2/153 | 22/18493  |
| GO:0032703 | negative regulation of interleukin-2 production                             | 1.41E-02 | <b>5.50E-02</b> | 10.99 | 2/153 | 22/18493  |
| GO:0032727 | positive regulation of interferon-alpha production                          | 1.41E-02 | <b>5.50E-02</b> | 10.99 | 2/153 | 22/18493  |

|            |                                                                |          |                 |       |       |           |
|------------|----------------------------------------------------------------|----------|-----------------|-------|-------|-----------|
| GO:0042454 | ribonucleoside catabolic process                               | 1.41E-02 | <b>5.50E-02</b> | 10.99 | 2/153 | 22/18493  |
| GO:0045663 | positive regulation of myoblast differentiation                | 1.41E-02 | <b>5.50E-02</b> | 10.99 | 2/153 | 22/18493  |
| GO:0071379 | cellular response to prostaglandin stimulus                    | 1.41E-02 | <b>5.50E-02</b> | 10.99 | 2/153 | 22/18493  |
| GO:0032479 | regulation of type I interferon production                     | 1.45E-02 | <b>5.62E-02</b> | 4.28  | 4/153 | 113/18493 |
| GO:0051153 | regulation of striated muscle cell differentiation             | 1.45E-02 | <b>5.62E-02</b> | 4.28  | 4/153 | 113/18493 |
| GO:0045428 | regulation of nitric oxide biosynthetic process                | 1.47E-02 | <b>5.71E-02</b> | 5.85  | 3/153 | 62/18493  |
| GO:0032606 | type I interferon production                                   | 1.49E-02 | <b>5.77E-02</b> | 4.24  | 4/153 | 114/18493 |
| GO:1903409 | reactive oxygen species biosynthetic process                   | 1.53E-02 | <b>5.90E-02</b> | 4.20  | 4/153 | 115/18493 |
| GO:0010499 | proteasomal ubiquitin-independent protein catabolic process    | 1.54E-02 | <b>5.90E-02</b> | 10.51 | 2/153 | 23/18493  |
| GO:0071404 | cellular response to low-density lipoprotein particle stimulus | 1.54E-02 | <b>5.90E-02</b> | 10.51 | 2/153 | 23/18493  |
| GO:0002637 | regulation of immunoglobulin production                        | 1.54E-02 | <b>5.90E-02</b> | 5.76  | 3/153 | 63/18493  |
| GO:0046637 | regulation of alpha-beta T cell differentiation                | 1.54E-02 | <b>5.90E-02</b> | 5.76  | 3/153 | 63/18493  |
| GO:0031098 | stress-activated protein kinase signaling cascade              | 1.55E-02 | <b>5.95E-02</b> | 2.70  | 7/153 | 313/18493 |
| GO:1904062 | regulation of cation transmembrane transport                   | 1.58E-02 | <b>6.04E-02</b> | 2.69  | 7/153 | 314/18493 |
| GO:0045670 | regulation of osteoclast differentiation                       | 1.60E-02 | <b>6.12E-02</b> | 5.67  | 3/153 | 64/18493  |
| GO:0050710 | negative regulation of cytokine secretion                      | 1.60E-02 | <b>6.12E-02</b> | 5.67  | 3/153 | 64/18493  |
| GO:0001952 | regulation of cell-matrix adhesion                             | 1.62E-02 | <b>6.20E-02</b> | 4.13  | 4/153 | 117/18493 |
| GO:0001516 | prostaglandin biosynthetic process                             | 1.67E-02 | <b>6.29E-02</b> | 10.07 | 2/153 | 24/18493  |
| GO:0032897 | negative regulation of viral transcription                     | 1.67E-02 | <b>6.29E-02</b> | 10.07 | 2/153 | 24/18493  |
| GO:0033081 | regulation of T cell differentiation in thymus                 | 1.67E-02 | <b>6.29E-02</b> | 10.07 | 2/153 | 24/18493  |
| GO:0046457 | prostanoid biosynthetic process                                | 1.67E-02 | <b>6.29E-02</b> | 10.07 | 2/153 | 24/18493  |
| GO:0050855 | regulation of B cell receptor signaling pathway                | 1.67E-02 | <b>6.29E-02</b> | 10.07 | 2/153 | 24/18493  |
| GO:2000482 | regulation of interleukin-8 secretion                          | 1.67E-02 | <b>6.29E-02</b> | 10.07 | 2/153 | 24/18493  |
| GO:0002377 | immunoglobulin production                                      | 1.70E-02 | <b>6.43E-02</b> | 3.36  | 5/153 | 180/18493 |
| GO:0002709 | regulation of T cell mediated immunity                         | 1.74E-02 | <b>6.53E-02</b> | 5.49  | 3/153 | 66/18493  |
| GO:0010812 | negative regulation of cell-substrate adhesion                 | 1.74E-02 | <b>6.53E-02</b> | 5.49  | 3/153 | 66/18493  |
| GO:0032677 | regulation of interleukin-8 production                         | 1.74E-02 | <b>6.53E-02</b> | 5.49  | 3/153 | 66/18493  |
| GO:0019751 | polyol metabolic process                                       | 1.77E-02 | <b>6.62E-02</b> | 4.03  | 4/153 | 120/18493 |

|            |                                                                    |          |                 |      |       |           |
|------------|--------------------------------------------------------------------|----------|-----------------|------|-------|-----------|
| GO:0002507 | tolerance induction                                                | 1.80E-02 | <b>6.71E-02</b> | 9.67 | 2/153 | 25/18493  |
| GO:0032461 | positive regulation of protein oligomerization                     | 1.80E-02 | <b>6.71E-02</b> | 9.67 | 2/153 | 25/18493  |
| GO:0045662 | negative regulation of myoblast differentiation                    | 1.80E-02 | <b>6.71E-02</b> | 9.67 | 2/153 | 25/18493  |
| GO:0050858 | negative regulation of antigen receptor-mediated signaling pathway | 1.80E-02 | <b>6.71E-02</b> | 9.67 | 2/153 | 25/18493  |
| GO:0071902 | positive regulation of protein serine/threonine kinase activity    | 1.81E-02 | <b>6.74E-02</b> | 2.62 | 7/153 | 323/18493 |
| GO:0046328 | regulation of JNK cascade                                          | 1.86E-02 | <b>6.89E-02</b> | 3.28 | 5/153 | 184/18493 |
| GO:1901652 | response to peptide                                                | 1.88E-02 | <b>6.96E-02</b> | 2.26 | 9/153 | 481/18493 |
| GO:2000377 | regulation of reactive oxygen species metabolic process            | 1.89E-02 | <b>7.02E-02</b> | 3.27 | 5/153 | 185/18493 |
| GO:0019933 | cAMP-mediated signaling                                            | 1.93E-02 | <b>7.15E-02</b> | 3.25 | 5/153 | 186/18493 |
| GO:0070168 | negative regulation of biomineral tissue development               | 1.94E-02 | <b>7.17E-02</b> | 9.30 | 2/153 | 26/18493  |
| GO:0006801 | superoxide metabolic process                                       | 1.95E-02 | <b>7.21E-02</b> | 5.26 | 3/153 | 69/18493  |
| GO:0034763 | negative regulation of transmembrane transport                     | 1.97E-02 | <b>7.24E-02</b> | 3.90 | 4/153 | 124/18493 |
| GO:0031099 | regeneration                                                       | 2.02E-02 | <b>7.41E-02</b> | 3.21 | 5/153 | 188/18493 |
| GO:0042531 | positive regulation of tyrosine phosphorylation of STAT protein    | 2.03E-02 | <b>7.43E-02</b> | 5.18 | 3/153 | 70/18493  |
| GO:0048662 | negative regulation of smooth muscle cell proliferation            | 2.03E-02 | <b>7.43E-02</b> | 5.18 | 3/153 | 70/18493  |
| GO:1904427 | positive regulation of calcium ion transmembrane transport         | 2.03E-02 | <b>7.43E-02</b> | 5.18 | 3/153 | 70/18493  |
| GO:0043406 | positive regulation of MAP kinase activity                         | 2.05E-02 | <b>7.51E-02</b> | 2.81 | 6/153 | 258/18493 |
| GO:0001101 | response to acid chemical                                          | 2.07E-02 | <b>7.55E-02</b> | 2.55 | 7/153 | 332/18493 |
| GO:0002920 | regulation of humoral immune response                              | 2.07E-02 | <b>7.55E-02</b> | 3.84 | 4/153 | 126/18493 |
| GO:0043921 | modulation by host of viral transcription                          | 2.08E-02 | <b>7.56E-02</b> | 8.95 | 2/153 | 27/18493  |
| GO:0052472 | modulation by host of symbiont transcription                       | 2.08E-02 | <b>7.56E-02</b> | 8.95 | 2/153 | 27/18493  |
| GO:1990776 | response to angiotensin                                            | 2.08E-02 | <b>7.56E-02</b> | 8.95 | 2/153 | 27/18493  |
| GO:1901654 | response to ketone                                                 | 2.10E-02 | <b>7.60E-02</b> | 3.18 | 5/153 | 190/18493 |
| GO:0051155 | positive regulation of striated muscle cell differentiation        | 2.11E-02 | <b>7.62E-02</b> | 5.11 | 3/153 | 71/18493  |
| GO:0045471 | response to ethanol                                                | 2.13E-02 | <b>7.68E-02</b> | 3.81 | 4/153 | 127/18493 |
| GO:0007596 | blood coagulation                                                  | 2.13E-02 | <b>7.68E-02</b> | 2.53 | 7/153 | 334/18493 |

|            |                                                                                 |          |                 |      |       |           |
|------------|---------------------------------------------------------------------------------|----------|-----------------|------|-------|-----------|
| GO:0043405 | regulation of MAP kinase activity                                               | 2.16E-02 | <b>7.78E-02</b> | 2.53 | 7/153 | 335/18493 |
| GO:0050709 | negative regulation of protein secretion                                        | 2.18E-02 | <b>7.84E-02</b> | 3.78 | 4/153 | 128/18493 |
| GO:0009988 | cell-cell recognition                                                           | 2.19E-02 | <b>7.84E-02</b> | 5.04 | 3/153 | 72/18493  |
| GO:0030278 | regulation of ossification                                                      | 2.23E-02 | <b>7.93E-02</b> | 3.13 | 5/153 | 193/18493 |
| GO:0002888 | positive regulation of myeloid leukocyte mediated immunity                      | 2.23E-02 | <b>7.93E-02</b> | 8.63 | 2/153 | 28/18493  |
| GO:0032647 | regulation of interferon-alpha production                                       | 2.23E-02 | <b>7.93E-02</b> | 8.63 | 2/153 | 28/18493  |
| GO:0052312 | modulation of transcription in other organism involved in symbiotic interaction | 2.23E-02 | <b>7.93E-02</b> | 8.63 | 2/153 | 28/18493  |
| GO:0061082 | myeloid leukocyte cytokine production                                           | 2.23E-02 | <b>7.93E-02</b> | 8.63 | 2/153 | 28/18493  |
| GO:0072606 | interleukin-8 secretion                                                         | 2.23E-02 | <b>7.93E-02</b> | 8.63 | 2/153 | 28/18493  |
| GO:0032273 | positive regulation of protein polymerization                                   | 2.24E-02 | <b>7.93E-02</b> | 3.75 | 4/153 | 129/18493 |
| GO:0046425 | regulation of JAK-STAT cascade                                                  | 2.24E-02 | <b>7.93E-02</b> | 3.75 | 4/153 | 129/18493 |
| GO:0006809 | nitric oxide biosynthetic process                                               | 2.27E-02 | <b>8.01E-02</b> | 4.97 | 3/153 | 73/18493  |
| GO:0032637 | interleukin-8 production                                                        | 2.27E-02 | <b>8.01E-02</b> | 4.97 | 3/153 | 73/18493  |
| GO:0007599 | hemostasis                                                                      | 2.29E-02 | <b>8.08E-02</b> | 2.50 | 7/153 | 339/18493 |
| GO:0050817 | coagulation                                                                     | 2.32E-02 | <b>8.18E-02</b> | 2.49 | 7/153 | 340/18493 |
| GO:0022617 | extracellular matrix disassembly                                                | 2.35E-02 | <b>8.26E-02</b> | 4.90 | 3/153 | 74/18493  |
| GO:1903531 | negative regulation of secretion by cell                                        | 2.36E-02 | <b>8.30E-02</b> | 3.08 | 5/153 | 196/18493 |
| GO:0032607 | interferon-alpha production                                                     | 2.39E-02 | <b>8.35E-02</b> | 8.34 | 2/153 | 29/18493  |
| GO:0045954 | positive regulation of natural killer cell mediated cytotoxicity                | 2.39E-02 | <b>8.35E-02</b> | 8.34 | 2/153 | 29/18493  |
| GO:0050869 | negative regulation of B cell activation                                        | 2.39E-02 | <b>8.35E-02</b> | 8.34 | 2/153 | 29/18493  |
| GO:0070373 | negative regulation of ERK1 and ERK2 cascade                                    | 2.43E-02 | <b>8.50E-02</b> | 4.83 | 3/153 | 75/18493  |
| GO:0001773 | myeloid dendritic cell activation                                               | 2.54E-02 | <b>8.80E-02</b> | 8.06 | 2/153 | 30/18493  |
| GO:0002828 | regulation of type 2 immune response                                            | 2.54E-02 | <b>8.80E-02</b> | 8.06 | 2/153 | 30/18493  |
| GO:0010543 | regulation of platelet activation                                               | 2.54E-02 | <b>8.80E-02</b> | 8.06 | 2/153 | 30/18493  |
| GO:0032743 | positive regulation of interleukin-2 production                                 | 2.54E-02 | <b>8.80E-02</b> | 8.06 | 2/153 | 30/18493  |
| GO:0032814 | regulation of natural killer cell activation                                    | 2.54E-02 | <b>8.80E-02</b> | 8.06 | 2/153 | 30/18493  |
| GO:0038111 | interleukin-7-mediated signaling pathway                                        | 2.54E-02 | <b>8.80E-02</b> | 8.06 | 2/153 | 30/18493  |

|            |                                                                                        |          |                 |      |       |           |
|------------|----------------------------------------------------------------------------------------|----------|-----------------|------|-------|-----------|
| GO:0042590 | antigen processing and presentation of exogenous peptide antigen via MHC class I       | 2.54E-02 | <b>8.80E-02</b> | 8.06 | 2/153 | 30/18493  |
| GO:1902905 | positive regulation of supramolecular fiber organization                               | 2.55E-02 | <b>8.81E-02</b> | 3.02 | 5/153 | 200/18493 |
| GO:0002718 | regulation of cytokine production involved in immune response                          | 2.60E-02 | <b>8.97E-02</b> | 4.71 | 3/153 | 77/18493  |
| GO:0046209 | nitric oxide metabolic process                                                         | 2.60E-02 | <b>8.97E-02</b> | 4.71 | 3/153 | 77/18493  |
| GO:0014065 | phosphatidylinositol 3-kinase signaling                                                | 2.65E-02 | <b>9.11E-02</b> | 3.55 | 4/153 | 136/18493 |
| GO:1904064 | positive regulation of cation transmembrane transport                                  | 2.65E-02 | <b>9.11E-02</b> | 3.55 | 4/153 | 136/18493 |
| GO:0031100 | animal organ regeneration                                                              | 2.69E-02 | <b>9.16E-02</b> | 4.65 | 3/153 | 78/18493  |
| GO:0071260 | cellular response to mechanical stimulus                                               | 2.69E-02 | <b>9.16E-02</b> | 4.65 | 3/153 | 78/18493  |
| GO:0002717 | positive regulation of natural killer cell mediated immunity                           | 2.70E-02 | <b>9.16E-02</b> | 7.80 | 2/153 | 31/18493  |
| GO:0043552 | positive regulation of phosphatidylinositol 3-kinase activity                          | 2.70E-02 | <b>9.16E-02</b> | 7.80 | 2/153 | 31/18493  |
| GO:0045589 | regulation of regulatory T cell differentiation                                        | 2.70E-02 | <b>9.16E-02</b> | 7.80 | 2/153 | 31/18493  |
| GO:0048873 | homeostasis of number of cells within a tissue                                         | 2.70E-02 | <b>9.16E-02</b> | 7.80 | 2/153 | 31/18493  |
| GO:0055094 | response to lipoprotein particle                                                       | 2.70E-02 | <b>9.16E-02</b> | 7.80 | 2/153 | 31/18493  |
| GO:0098760 | response to interleukin-7                                                              | 2.70E-02 | <b>9.16E-02</b> | 7.80 | 2/153 | 31/18493  |
| GO:0098761 | cellular response to interleukin-7                                                     | 2.70E-02 | <b>9.16E-02</b> | 7.80 | 2/153 | 31/18493  |
| GO:1902230 | negative regulation of intrinsic apoptotic signaling pathway in response to DNA damage | 2.70E-02 | <b>9.16E-02</b> | 7.80 | 2/153 | 31/18493  |
| GO:0072593 | reactive oxygen species metabolic process                                              | 2.74E-02 | <b>9.26E-02</b> | 2.63 | 6/153 | 276/18493 |
| GO:0017157 | regulation of exocytosis                                                               | 2.75E-02 | <b>9.26E-02</b> | 2.96 | 5/153 | 204/18493 |
| GO:0032869 | cellular response to insulin stimulus                                                  | 2.75E-02 | <b>9.26E-02</b> | 2.96 | 5/153 | 204/18493 |
| GO:0050728 | negative regulation of inflammatory response                                           | 2.84E-02 | <b>9.58E-02</b> | 3.48 | 4/153 | 139/18493 |
| GO:0030851 | granulocyte differentiation                                                            | 2.87E-02 | <b>9.59E-02</b> | 7.55 | 2/153 | 32/18493  |
| GO:0048841 | regulation of axon extension involved in axon guidance                                 | 2.87E-02 | <b>9.59E-02</b> | 7.55 | 2/153 | 32/18493  |
| GO:0071353 | cellular response to interleukin-4                                                     | 2.87E-02 | <b>9.59E-02</b> | 7.55 | 2/153 | 32/18493  |
| GO:0042509 | regulation of tyrosine phosphorylation of STAT protein                                 | 2.87E-02 | <b>9.59E-02</b> | 4.53 | 3/153 | 80/18493  |
| GO:0050764 | regulation of phagocytosis                                                             | 2.87E-02 | <b>9.59E-02</b> | 4.53 | 3/153 | 80/18493  |
| GO:2001057 | reactive nitrogen species metabolic process                                            | 2.87E-02 | <b>9.59E-02</b> | 4.53 | 3/153 | 80/18493  |

|            |                                                                             |          |                 |      |       |           |
|------------|-----------------------------------------------------------------------------|----------|-----------------|------|-------|-----------|
| GO:0046330 | positive regulation of JNK cascade                                          | 2.91E-02 | <b>9.70E-02</b> | 3.45 | 4/153 | 140/18493 |
| GO:0001914 | regulation of T cell mediated cytotoxicity                                  | 3.04E-02 | <b>1.00E-01</b> | 7.33 | 2/153 | 33/18493  |
| GO:0009164 | nucleoside catabolic process                                                | 3.04E-02 | <b>1.00E-01</b> | 7.33 | 2/153 | 33/18493  |
| GO:0016601 | Rac protein signal transduction                                             | 3.04E-02 | <b>1.00E-01</b> | 7.33 | 2/153 | 33/18493  |
| GO:0030947 | regulation of vascular endothelial growth factor receptor signaling pathway | 3.04E-02 | <b>1.00E-01</b> | 7.33 | 2/153 | 33/18493  |
| GO:0045066 | regulatory T cell differentiation                                           | 3.04E-02 | <b>1.00E-01</b> | 7.33 | 2/153 | 33/18493  |
| GO:0071354 | cellular response to interleukin-6                                          | 3.04E-02 | <b>1.00E-01</b> | 7.33 | 2/153 | 33/18493  |
| GO:0071402 | cellular response to lipoprotein particle stimulus                          | 3.04E-02 | <b>1.00E-01</b> | 7.33 | 2/153 | 33/18493  |
| GO:2001056 | positive regulation of cysteine-type endopeptidase activity                 | 3.11E-02 | <b>1.03E-01</b> | 3.38 | 4/153 | 143/18493 |
| GO:0002526 | acute inflammatory response                                                 | 3.11E-02 | <b>1.03E-01</b> | 2.86 | 5/153 | 211/18493 |
| GO:0007009 | plasma membrane organization                                                | 3.15E-02 | <b>1.04E-01</b> | 4.37 | 3/153 | 83/18493  |
| GO:0007260 | tyrosine phosphorylation of STAT protein                                    | 3.15E-02 | <b>1.04E-01</b> | 4.37 | 3/153 | 83/18493  |
| GO:0010922 | positive regulation of phosphatase activity                                 | 3.21E-02 | <b>1.05E-01</b> | 7.11 | 2/153 | 34/18493  |
| GO:0030224 | monocyte differentiation                                                    | 3.21E-02 | <b>1.05E-01</b> | 7.11 | 2/153 | 34/18493  |
| GO:0090322 | regulation of superoxide metabolic process                                  | 3.21E-02 | <b>1.05E-01</b> | 7.11 | 2/153 | 34/18493  |
| GO:1903131 | mononuclear cell differentiation                                            | 3.21E-02 | <b>1.05E-01</b> | 7.11 | 2/153 | 34/18493  |
| GO:0008277 | regulation of G protein-coupled receptor signaling pathway                  | 3.25E-02 | <b>1.06E-01</b> | 3.33 | 4/153 | 145/18493 |
| GO:0019935 | cyclic-nucleotide-mediated signaling                                        | 3.28E-02 | <b>1.07E-01</b> | 2.82 | 5/153 | 214/18493 |
| GO:0002262 | myeloid cell homeostasis                                                    | 3.32E-02 | <b>1.08E-01</b> | 3.31 | 4/153 | 146/18493 |
| GO:0046427 | positive regulation of JAK-STAT cascade                                     | 3.35E-02 | <b>1.09E-01</b> | 4.27 | 3/153 | 85/18493  |
| GO:0048246 | macrophage chemotaxis                                                       | 3.39E-02 | <b>1.10E-01</b> | 6.91 | 2/153 | 35/18493  |
| GO:0070670 | response to interleukin-4                                                   | 3.39E-02 | <b>1.10E-01</b> | 6.91 | 2/153 | 35/18493  |
| GO:0090218 | positive regulation of lipid kinase activity                                | 3.39E-02 | <b>1.10E-01</b> | 6.91 | 2/153 | 35/18493  |
| GO:0048524 | positive regulation of viral process                                        | 3.45E-02 | <b>1.12E-01</b> | 4.22 | 3/153 | 86/18493  |
| GO:0034767 | positive regulation of ion transmembrane transport                          | 3.46E-02 | <b>1.12E-01</b> | 3.27 | 4/153 | 148/18493 |
| GO:0072330 | monocarboxylic acid biosynthetic process                                    | 3.52E-02 | <b>1.13E-01</b> | 2.48 | 6/153 | 293/18493 |
| GO:0034765 | regulation of ion transmembrane transport                                   | 3.53E-02 | <b>1.13E-01</b> | 2.13 | 8/153 | 454/18493 |



|            |                                                                                                                                                  |          |                 |      |       |           |
|------------|--------------------------------------------------------------------------------------------------------------------------------------------------|----------|-----------------|------|-------|-----------|
| GO:0002455 | humoral immune response mediated by circulating immunoglobulin                                                                                   | 3.54E-02 | <b>1.13E-01</b> | 3.24 | 4/153 | 149/18493 |
| GO:0002673 | regulation of acute inflammatory response                                                                                                        | 3.54E-02 | <b>1.13E-01</b> | 3.24 | 4/153 | 149/18493 |
| GO:0061025 | membrane fusion                                                                                                                                  | 3.54E-02 | <b>1.13E-01</b> | 3.24 | 4/153 | 149/18493 |
| GO:0006692 | prostanoid metabolic process                                                                                                                     | 3.57E-02 | <b>1.14E-01</b> | 6.71 | 2/153 | 36/18493  |
| GO:0006693 | prostaglandin metabolic process                                                                                                                  | 3.57E-02 | <b>1.14E-01</b> | 6.71 | 2/153 | 36/18493  |
| GO:0042092 | type 2 immune response                                                                                                                           | 3.57E-02 | <b>1.14E-01</b> | 6.71 | 2/153 | 36/18493  |
| GO:0090279 | regulation of calcium ion import                                                                                                                 | 3.57E-02 | <b>1.14E-01</b> | 6.71 | 2/153 | 36/18493  |
| GO:0000187 | activation of MAPK activity                                                                                                                      | 3.61E-02 | <b>1.15E-01</b> | 3.22 | 4/153 | 150/18493 |
| GO:0008360 | regulation of cell shape                                                                                                                         | 3.69E-02 | <b>1.17E-01</b> | 3.20 | 4/153 | 151/18493 |
| GO:0002823 | negative regulation of adaptive immune response based on somatic recombination of immune receptors built from immunoglobulin superfamily domains | 3.75E-02 | <b>1.18E-01</b> | 6.53 | 2/153 | 37/18493  |
| GO:0014912 | negative regulation of smooth muscle cell migration                                                                                              | 3.75E-02 | <b>1.18E-01</b> | 6.53 | 2/153 | 37/18493  |
| GO:0048846 | axon extension involved in axon guidance                                                                                                         | 3.75E-02 | <b>1.18E-01</b> | 6.53 | 2/153 | 37/18493  |
| GO:0070741 | response to interleukin-6                                                                                                                        | 3.75E-02 | <b>1.18E-01</b> | 6.53 | 2/153 | 37/18493  |
| GO:0071276 | cellular response to cadmium ion                                                                                                                 | 3.75E-02 | <b>1.18E-01</b> | 6.53 | 2/153 | 37/18493  |
| GO:1902284 | neuron projection extension involved in neuron projection guidance                                                                               | 3.75E-02 | <b>1.18E-01</b> | 6.53 | 2/153 | 37/18493  |
| GO:0000302 | response to reactive oxygen species                                                                                                              | 3.87E-02 | <b>1.22E-01</b> | 2.70 | 5/153 | 224/18493 |
| GO:0048145 | regulation of fibroblast proliferation                                                                                                           | 3.87E-02 | <b>1.22E-01</b> | 4.03 | 3/153 | 90/18493  |
| GO:0002714 | positive regulation of B cell mediated immunity                                                                                                  | 3.94E-02 | <b>1.24E-01</b> | 6.36 | 2/153 | 38/18493  |
| GO:0002891 | positive regulation of immunoglobulin mediated immune response                                                                                   | 3.94E-02 | <b>1.24E-01</b> | 6.36 | 2/153 | 38/18493  |
| GO:0030204 | chondroitin sulfate metabolic process                                                                                                            | 3.94E-02 | <b>1.24E-01</b> | 6.36 | 2/153 | 38/18493  |
| GO:0048010 | vascular endothelial growth factor receptor signaling pathway                                                                                    | 3.98E-02 | <b>1.24E-01</b> | 3.98 | 3/153 | 91/18493  |
| GO:0048144 | fibroblast proliferation                                                                                                                         | 3.98E-02 | <b>1.24E-01</b> | 3.98 | 3/153 | 91/18493  |
| GO:0090630 | activation of GTPase activity                                                                                                                    | 3.98E-02 | <b>1.24E-01</b> | 3.98 | 3/153 | 91/18493  |
| GO:1901570 | fatty acid derivative biosynthetic process                                                                                                       | 3.98E-02 | <b>1.24E-01</b> | 3.98 | 3/153 | 91/18493  |
| GO:0060560 | developmental growth involved in morphogenesis                                                                                                   | 4.06E-02 | <b>1.27E-01</b> | 2.66 | 5/153 | 227/18493 |



|            |                                                                               |          |                 |      |       |           |
|------------|-------------------------------------------------------------------------------|----------|-----------------|------|-------|-----------|
| GO:0051896 | regulation of protein kinase B signaling                                      | 4.12E-02 | <b>1.28E-01</b> | 2.65 | 5/153 | 228/18493 |
| GO:1902229 | regulation of intrinsic apoptotic signaling pathway in response to DNA damage | 4.13E-02 | <b>1.28E-01</b> | 6.20 | 2/153 | 39/18493  |
| GO:0030203 | glycosaminoglycan metabolic process                                           | 4.16E-02 | <b>1.29E-01</b> | 3.08 | 4/153 | 157/18493 |
| GO:0071375 | cellular response to peptide hormone stimulus                                 | 4.26E-02 | <b>1.32E-01</b> | 2.36 | 6/153 | 307/18493 |
| GO:1903426 | regulation of reactive oxygen species biosynthetic process                    | 4.31E-02 | <b>1.33E-01</b> | 3.86 | 3/153 | 94/18493  |
| GO:0030225 | macrophage differentiation                                                    | 4.32E-02 | <b>1.33E-01</b> | 6.04 | 2/153 | 40/18493  |
| GO:0097028 | dendritic cell differentiation                                                | 4.32E-02 | <b>1.33E-01</b> | 6.04 | 2/153 | 40/18493  |
| GO:0006644 | phospholipid metabolic process                                                | 4.32E-02 | <b>1.33E-01</b> | 2.04 | 8/153 | 473/18493 |
| GO:0022604 | regulation of cell morphogenesis                                              | 4.37E-02 | <b>1.35E-01</b> | 2.04 | 8/153 | 474/18493 |
| GO:0002367 | cytokine production involved in immune response                               | 4.43E-02 | <b>1.36E-01</b> | 3.82 | 3/153 | 95/18493  |
| GO:0016485 | protein processing                                                            | 4.43E-02 | <b>1.36E-01</b> | 2.34 | 6/153 | 310/18493 |
| GO:0035821 | modification of morphology or physiology of other organism                    | 4.49E-02 | <b>1.38E-01</b> | 3.00 | 4/153 | 161/18493 |
| GO:1990138 | neuron projection extension                                                   | 4.49E-02 | <b>1.38E-01</b> | 3.00 | 4/153 | 161/18493 |
| GO:0030866 | cortical actin cytoskeleton organization                                      | 4.52E-02 | <b>1.38E-01</b> | 5.90 | 2/153 | 41/18493  |
| GO:0010771 | negative regulation of cell morphogenesis involved in differentiation         | 4.54E-02 | <b>1.39E-01</b> | 3.78 | 3/153 | 96/18493  |
| GO:0043902 | positive regulation of multi-organism process                                 | 4.57E-02 | <b>1.40E-01</b> | 2.98 | 4/153 | 162/18493 |
| GO:0032872 | regulation of stress-activated MAPK cascade                                   | 4.59E-02 | <b>1.40E-01</b> | 2.57 | 5/153 | 235/18493 |
| GO:0001666 | response to hypoxia                                                           | 4.66E-02 | <b>1.42E-01</b> | 2.31 | 6/153 | 314/18493 |
| GO:0001953 | negative regulation of cell-matrix adhesion                                   | 4.72E-02 | <b>1.43E-01</b> | 5.76 | 2/153 | 42/18493  |
| GO:0002437 | inflammatory response to antigenic stimulus                                   | 4.72E-02 | <b>1.43E-01</b> | 5.76 | 2/153 | 42/18493  |
| GO:0032459 | regulation of protein oligomerization                                         | 4.72E-02 | <b>1.43E-01</b> | 5.76 | 2/153 | 42/18493  |
| GO:0043124 | negative regulation of I-kappaB kinase/NF-kappaB signaling                    | 4.72E-02 | <b>1.43E-01</b> | 5.76 | 2/153 | 42/18493  |
| GO:0045581 | negative regulation of T cell differentiation                                 | 4.72E-02 | <b>1.43E-01</b> | 5.76 | 2/153 | 42/18493  |
| GO:0070302 | regulation of stress-activated protein kinase signaling cascade               | 4.73E-02 | <b>1.43E-01</b> | 2.55 | 5/153 | 237/18493 |
| GO:0048015 | phosphatidylinositol-mediated signaling                                       | 4.75E-02 | <b>1.43E-01</b> | 2.95 | 4/153 | 164/18493 |
| GO:1903829 | positive regulation of cellular protein localization                          | 4.91E-02 | <b>1.47E-01</b> | 2.28 | 6/153 | 318/18493 |

|            |                                                                                                 |          |                 |       |       |           |
|------------|-------------------------------------------------------------------------------------------------|----------|-----------------|-------|-------|-----------|
| GO:2000045 | regulation of G1/S transition of mitotic cell cycle                                             | 4.92E-02 | <b>1.47E-01</b> | 2.91  | 4/153 | 166/18493 |
| GO:0002534 | cytokine production involved in inflammatory response                                           | 4.92E-02 | <b>1.47E-01</b> | 5.62  | 2/153 | 43/18493  |
| GO:0042771 | intrinsic apoptotic signaling pathway in response to DNA damage by p53 class mediator           | 4.92E-02 | <b>1.47E-01</b> | 5.62  | 2/153 | 43/18493  |
| GO:0050654 | chondroitin sulfate proteoglycan metabolic process                                              | 4.92E-02 | <b>1.47E-01</b> | 5.62  | 2/153 | 43/18493  |
| GO:1900087 | positive regulation of G1/S transition of mitotic cell cycle                                    | 4.92E-02 | <b>1.47E-01</b> | 5.62  | 2/153 | 43/18493  |
| GO:1901658 | glycosyl compound catabolic process                                                             | 4.92E-02 | <b>1.47E-01</b> | 5.62  | 2/153 | 43/18493  |
| GO:1902667 | regulation of axon guidance                                                                     | 4.92E-02 | <b>1.47E-01</b> | 5.62  | 2/153 | 43/18493  |
| GO:0042742 | defense response to bacterium                                                                   | 4.97E-02 | <b>1.48E-01</b> | 2.27  | 6/153 | 319/18493 |
| GO:0006022 | aminoglycan metabolic process                                                                   | 5.01E-02 | <b>1.49E-01</b> | 2.90  | 4/153 | 167/18493 |
| GO:0048017 | inositol lipid-mediated signaling                                                               | 5.01E-02 | <b>1.49E-01</b> | 2.90  | 4/153 | 167/18493 |
| GO:0050848 | regulation of calcium-mediated signaling                                                        | 5.02E-02 | <b>1.49E-01</b> | 3.63  | 3/153 | 100/18493 |
| GO:0120034 | positive regulation of plasma membrane bounded cell projection assembly                         | 5.02E-02 | <b>1.49E-01</b> | 3.63  | 3/153 | 100/18493 |
| GO:0046394 | carboxylic acid biosynthetic process                                                            | 4.09E-03 | <b>1.25E-01</b> | 8.98  | 3/15  | 412/18493 |
| GO:0016053 | organic acid biosynthetic process                                                               | 4.12E-03 | <b>1.25E-01</b> | 8.96  | 3/15  | 413/18493 |
| GO:0046718 | viral entry into host cell                                                                      | 4.22E-03 | <b>1.25E-01</b> | 20.38 | 2/15  | 121/18493 |
| GO:0090101 | negative regulation of transmembrane receptor protein serine/threonine kinase signaling pathway | 4.35E-03 | <b>1.25E-01</b> | 20.05 | 2/15  | 123/18493 |
| GO:0044282 | small molecule catabolic process                                                                | 4.64E-03 | <b>1.25E-01</b> | 8.58  | 3/15  | 431/18493 |
| GO:0030260 | entry into host cell                                                                            | 5.07E-03 | <b>1.25E-01</b> | 18.54 | 2/15  | 133/18493 |
| GO:0034620 | cellular response to unfolded protein                                                           | 5.07E-03 | <b>1.25E-01</b> | 18.54 | 2/15  | 133/18493 |
| GO:0044409 | entry into host                                                                                 | 5.07E-03 | <b>1.25E-01</b> | 18.54 | 2/15  | 133/18493 |
| GO:0051806 | entry into cell of other organism involved in symbiotic interaction                             | 5.07E-03 | <b>1.25E-01</b> | 18.54 | 2/15  | 133/18493 |
| GO:0051828 | entry into other organism involved in symbiotic interaction                                     | 5.07E-03 | <b>1.25E-01</b> | 18.54 | 2/15  | 133/18493 |
| GO:0009408 | response to heat                                                                                | 6.00E-03 | <b>1.25E-01</b> | 17.01 | 2/15  | 145/18493 |
| GO:0051092 | positive regulation of NF-kappaB transcription factor activity                                  | 6.08E-03 | <b>1.25E-01</b> | 16.89 | 2/15  | 146/18493 |
| GO:0035967 | cellular response to topologically incorrect protein                                            | 6.49E-03 | <b>1.25E-01</b> | 16.33 | 2/15  | 151/18493 |

|            |                                                                                            |          |                 |        |      |           |
|------------|--------------------------------------------------------------------------------------------|----------|-----------------|--------|------|-----------|
| GO:0090288 | negative regulation of cellular response to growth factor stimulus                         | 7.25E-03 | <b>1.25E-01</b> | 15.41  | 2/15 | 160/18493 |
| GO:0006986 | response to unfolded protein                                                               | 8.06E-03 | <b>1.25E-01</b> | 14.59  | 2/15 | 169/18493 |
| GO:0042989 | sequestering of actin monomers                                                             | 8.08E-03 | <b>1.25E-01</b> | 123.29 | 1/15 | 10/18493  |
| GO:0002003 | angiotensin maturation                                                                     | 8.89E-03 | <b>1.25E-01</b> | 112.08 | 1/15 | 11/18493  |
| GO:0010172 | embryonic body morphogenesis                                                               | 8.89E-03 | <b>1.25E-01</b> | 112.08 | 1/15 | 11/18493  |
| GO:0016322 | neuron remodeling                                                                          | 8.89E-03 | <b>1.25E-01</b> | 112.08 | 1/15 | 11/18493  |
| GO:0018065 | protein-cofactor linkage                                                                   | 8.89E-03 | <b>1.25E-01</b> | 112.08 | 1/15 | 11/18493  |
| GO:0033632 | regulation of cell-cell adhesion mediated by integrin                                      | 8.89E-03 | <b>1.25E-01</b> | 112.08 | 1/15 | 11/18493  |
| GO:0090084 | negative regulation of inclusion body assembly                                             | 8.89E-03 | <b>1.25E-01</b> | 112.08 | 1/15 | 11/18493  |
| GO:0002002 | regulation of angiotensin levels in blood                                                  | 9.69E-03 | <b>1.25E-01</b> | 102.74 | 1/15 | 12/18493  |
| GO:0035641 | locomotory exploration behavior                                                            | 9.69E-03 | <b>1.25E-01</b> | 102.74 | 1/15 | 12/18493  |
| GO:0097201 | negative regulation of transcription from RNA polymerase II promoter in response to stress | 9.69E-03 | <b>1.25E-01</b> | 102.74 | 1/15 | 12/18493  |
| GO:0035966 | response to topologically incorrect protein                                                | 1.00E-02 | <b>1.25E-01</b> | 13.05  | 2/15 | 189/18493 |
| GO:0006694 | steroid biosynthetic process                                                               | 1.04E-02 | <b>1.25E-01</b> | 12.78  | 2/15 | 193/18493 |
| GO:0009086 | methionine biosynthetic process                                                            | 1.05E-02 | <b>1.25E-01</b> | 94.84  | 1/15 | 13/18493  |
| GO:0032530 | regulation of microvillus organization                                                     | 1.05E-02 | <b>1.25E-01</b> | 94.84  | 1/15 | 13/18493  |
| GO:0032536 | regulation of cell projection size                                                         | 1.05E-02 | <b>1.25E-01</b> | 94.84  | 1/15 | 13/18493  |
| GO:0070431 | nucleotide-binding oligomerization domain containing 2 signaling pathway                   | 1.05E-02 | <b>1.25E-01</b> | 94.84  | 1/15 | 13/18493  |
| GO:0071872 | cellular response to epinephrine stimulus                                                  | 1.05E-02 | <b>1.25E-01</b> | 94.84  | 1/15 | 13/18493  |
| GO:1903054 | negative regulation of extracellular matrix organization                                   | 1.05E-02 | <b>1.25E-01</b> | 94.84  | 1/15 | 13/18493  |
| GO:0007626 | locomotory behavior                                                                        | 1.05E-02 | <b>1.25E-01</b> | 12.71  | 2/15 | 194/18493 |
| GO:0000098 | sulfur amino acid catabolic process                                                        | 1.13E-02 | <b>1.25E-01</b> | 88.06  | 1/15 | 14/18493  |
| GO:0050667 | homocysteine metabolic process                                                             | 1.13E-02 | <b>1.25E-01</b> | 88.06  | 1/15 | 14/18493  |
| GO:0090399 | replicative senescence                                                                     | 1.13E-02 | <b>1.25E-01</b> | 88.06  | 1/15 | 14/18493  |
| GO:0099558 | maintenance of synapse structure                                                           | 1.13E-02 | <b>1.25E-01</b> | 88.06  | 1/15 | 14/18493  |
| GO:1901386 | negative regulation of voltage-gated calcium channel activity                              | 1.13E-02 | <b>1.25E-01</b> | 88.06  | 1/15 | 14/18493  |

|            |                                                                                                   |          |                 |       |      |           |
|------------|---------------------------------------------------------------------------------------------------|----------|-----------------|-------|------|-----------|
| GO:0009266 | response to temperature stimulus                                                                  | 1.20E-02 | <b>1.25E-01</b> | 11.85 | 2/15 | 208/18493 |
| GO:0032271 | regulation of protein polymerization                                                              | 1.20E-02 | <b>1.25E-01</b> | 11.85 | 2/15 | 208/18493 |
| GO:0010715 | regulation of extracellular matrix disassembly                                                    | 1.21E-02 | <b>1.25E-01</b> | 82.19 | 1/15 | 15/18493  |
| GO:0033540 | fatty acid beta-oxidation using acyl-CoA oxidase                                                  | 1.21E-02 | <b>1.25E-01</b> | 82.19 | 1/15 | 15/18493  |
| GO:0033631 | cell-cell adhesion mediated by integrin                                                           | 1.21E-02 | <b>1.25E-01</b> | 82.19 | 1/15 | 15/18493  |
| GO:0051701 | interaction with host                                                                             | 1.21E-02 | <b>1.25E-01</b> | 11.80 | 2/15 | 209/18493 |
| GO:0071871 | response to epinephrine                                                                           | 1.29E-02 | <b>1.25E-01</b> | 77.05 | 1/15 | 16/18493  |
| GO:0090083 | regulation of inclusion body assembly                                                             | 1.29E-02 | <b>1.25E-01</b> | 77.05 | 1/15 | 16/18493  |
| GO:0006457 | protein folding                                                                                   | 1.31E-02 | <b>1.25E-01</b> | 11.31 | 2/15 | 218/18493 |
| GO:0042445 | hormone metabolic process                                                                         | 1.31E-02 | <b>1.25E-01</b> | 11.31 | 2/15 | 218/18493 |
| GO:2001234 | negative regulation of apoptotic signaling pathway                                                | 1.36E-02 | <b>1.25E-01</b> | 11.11 | 2/15 | 222/18493 |
| GO:0006555 | methionine metabolic process                                                                      | 1.37E-02 | <b>1.25E-01</b> | 72.52 | 1/15 | 17/18493  |
| GO:0006704 | glucocorticoid biosynthetic process                                                               | 1.45E-02 | <b>1.25E-01</b> | 68.49 | 1/15 | 18/18493  |
| GO:0010224 | response to UV-B                                                                                  | 1.45E-02 | <b>1.25E-01</b> | 68.49 | 1/15 | 18/18493  |
| GO:1905065 | positive regulation of vascular smooth muscle cell differentiation                                | 1.45E-02 | <b>1.25E-01</b> | 68.49 | 1/15 | 18/18493  |
| GO:0090092 | regulation of transmembrane receptor protein serine/threonine kinase signaling pathway            | 1.51E-02 | <b>1.25E-01</b> | 10.49 | 2/15 | 235/18493 |
| GO:0001991 | regulation of systemic arterial blood pressure by circulatory renin-angiotensin                   | 1.53E-02 | <b>1.25E-01</b> | 64.89 | 1/15 | 19/18493  |
| GO:0006534 | cysteine metabolic process                                                                        | 1.53E-02 | <b>1.25E-01</b> | 64.89 | 1/15 | 19/18493  |
| GO:0051016 | barbed-end actin filament capping                                                                 | 1.53E-02 | <b>1.25E-01</b> | 64.89 | 1/15 | 19/18493  |
| GO:1901673 | regulation of mitotic spindle assembly                                                            | 1.53E-02 | <b>1.25E-01</b> | 64.89 | 1/15 | 19/18493  |
| GO:1902236 | negative regulation of endoplasmic reticulum stress-induced intrinsic apoptotic signaling pathway | 1.53E-02 | <b>1.25E-01</b> | 64.89 | 1/15 | 19/18493  |
| GO:0051131 | chaperone-mediated protein complex assembly                                                       | 1.61E-02 | <b>1.25E-01</b> | 61.64 | 1/15 | 20/18493  |
| GO:0097242 | amyloid-beta clearance                                                                            | 1.61E-02 | <b>1.25E-01</b> | 61.64 | 1/15 | 20/18493  |
| GO:0000097 | sulfur amino acid biosynthetic process                                                            | 1.69E-02 | <b>1.25E-01</b> | 58.71 | 1/15 | 21/18493  |
| GO:0009070 | serine family amino acid biosynthetic process                                                     | 1.69E-02 | <b>1.25E-01</b> | 58.71 | 1/15 | 21/18493  |
| GO:0046034 | ATP metabolic process                                                                             | 1.70E-02 | <b>1.25E-01</b> | 9.86  | 2/15 | 250/18493 |

|            |                                                                     |          |                 |       |      |           |
|------------|---------------------------------------------------------------------|----------|-----------------|-------|------|-----------|
| GO:0051091 | positive regulation of DNA-binding transcription factor activity    | 1.77E-02 | <b>1.25E-01</b> | 9.67  | 2/15 | 255/18493 |
| GO:0032069 | regulation of nuclease activity                                     | 1.77E-02 | <b>1.25E-01</b> | 56.04 | 1/15 | 22/18493  |
| GO:0070841 | inclusion body assembly                                             | 1.77E-02 | <b>1.25E-01</b> | 56.04 | 1/15 | 22/18493  |
| GO:0009067 | aspartate family amino acid biosynthetic process                    | 1.85E-02 | <b>1.25E-01</b> | 53.60 | 1/15 | 23/18493  |
| GO:0010226 | response to lithium ion                                             | 1.85E-02 | <b>1.25E-01</b> | 53.60 | 1/15 | 23/18493  |
| GO:0034976 | response to endoplasmic reticulum stress                            | 1.89E-02 | <b>1.25E-01</b> | 9.34  | 2/15 | 264/18493 |
| GO:0016054 | organic acid catabolic process                                      | 1.90E-02 | <b>1.25E-01</b> | 9.30  | 2/15 | 265/18493 |
| GO:0046395 | carboxylic acid catabolic process                                   | 1.90E-02 | <b>1.25E-01</b> | 9.30  | 2/15 | 265/18493 |
| GO:0032528 | microvillus organization                                            | 1.93E-02 | <b>1.25E-01</b> | 51.37 | 1/15 | 24/18493  |
| GO:0035640 | exploration behavior                                                | 1.93E-02 | <b>1.25E-01</b> | 51.37 | 1/15 | 24/18493  |
| GO:1900120 | regulation of receptor binding                                      | 1.93E-02 | <b>1.25E-01</b> | 51.37 | 1/15 | 24/18493  |
| GO:0006735 | NADH regeneration                                                   | 2.01E-02 | <b>1.25E-01</b> | 49.31 | 1/15 | 25/18493  |
| GO:0008211 | glucocorticoid metabolic process                                    | 2.01E-02 | <b>1.25E-01</b> | 49.31 | 1/15 | 25/18493  |
| GO:0009404 | toxin metabolic process                                             | 2.01E-02 | <b>1.25E-01</b> | 49.31 | 1/15 | 25/18493  |
| GO:0031116 | positive regulation of microtubule polymerization                   | 2.01E-02 | <b>1.25E-01</b> | 49.31 | 1/15 | 25/18493  |
| GO:0061621 | canonical glycolysis                                                | 2.01E-02 | <b>1.25E-01</b> | 49.31 | 1/15 | 25/18493  |
| GO:0061718 | glucose catabolic process to pyruvate                               | 2.01E-02 | <b>1.25E-01</b> | 49.31 | 1/15 | 25/18493  |
| GO:0051258 | protein polymerization                                              | 2.04E-02 | <b>1.25E-01</b> | 8.97  | 2/15 | 275/18493 |
| GO:0003081 | regulation of systemic arterial blood pressure by renin-angiotensin | 2.09E-02 | <b>1.25E-01</b> | 47.42 | 1/15 | 26/18493  |
| GO:0042026 | protein refolding                                                   | 2.09E-02 | <b>1.25E-01</b> | 47.42 | 1/15 | 26/18493  |
| GO:0051152 | positive regulation of smooth muscle cell differentiation           | 2.09E-02 | <b>1.25E-01</b> | 47.42 | 1/15 | 26/18493  |
| GO:0061615 | glycolytic process through fructose-6-phosphate                     | 2.09E-02 | <b>1.25E-01</b> | 47.42 | 1/15 | 26/18493  |
| GO:0061620 | glycolytic process through glucose-6-phosphate                      | 2.09E-02 | <b>1.25E-01</b> | 47.42 | 1/15 | 26/18493  |
| GO:0090169 | regulation of spindle assembly                                      | 2.09E-02 | <b>1.25E-01</b> | 47.42 | 1/15 | 26/18493  |
| GO:0009205 | purine ribonucleoside triphosphate metabolic process                | 2.11E-02 | <b>1.25E-01</b> | 8.81  | 2/15 | 280/18493 |
| GO:0090287 | regulation of cellular response to growth factor stimulus           | 2.13E-02 | <b>1.25E-01</b> | 8.74  | 2/15 | 282/18493 |
| GO:0044550 | secondary metabolite biosynthetic process                           | 2.17E-02 | <b>1.25E-01</b> | 45.66 | 1/15 | 27/18493  |
| GO:0009167 | purine ribonucleoside monophosphate metabolic process               | 2.19E-02 | <b>1.25E-01</b> | 8.62  | 2/15 | 286/18493 |

|            |                                                                                          |          |                 |       |      |           |
|------------|------------------------------------------------------------------------------------------|----------|-----------------|-------|------|-----------|
| GO:0009199 | ribonucleoside triphosphate metabolic process                                            | 2.19E-02 | <b>1.25E-01</b> | 8.62  | 2/15 | 286/18493 |
| GO:0009126 | purine nucleoside monophosphate metabolic process                                        | 2.21E-02 | <b>1.25E-01</b> | 8.59  | 2/15 | 287/18493 |
| GO:0009144 | purine nucleoside triphosphate metabolic process                                         | 2.21E-02 | <b>1.25E-01</b> | 8.59  | 2/15 | 287/18493 |
| GO:0019058 | viral life cycle                                                                         | 2.23E-02 | <b>1.25E-01</b> | 8.53  | 2/15 | 289/18493 |
| GO:0007020 | microtubule nucleation                                                                   | 2.25E-02 | <b>1.25E-01</b> | 44.03 | 1/15 | 28/18493  |
| GO:0072330 | monocarboxylic acid biosynthetic process                                                 | 2.29E-02 | <b>1.25E-01</b> | 8.42  | 2/15 | 293/18493 |
| GO:0031112 | positive regulation of microtubule polymerization or depolymerization                    | 2.33E-02 | <b>1.25E-01</b> | 42.51 | 1/15 | 29/18493  |
| GO:0009161 | ribonucleoside monophosphate metabolic process                                           | 2.40E-02 | <b>1.25E-01</b> | 8.22  | 2/15 | 300/18493 |
| GO:1902235 | regulation of endoplasmic reticulum stress-induced intrinsic apoptotic signaling pathway | 2.41E-02 | <b>1.25E-01</b> | 41.10 | 1/15 | 30/18493  |
| GO:0045648 | positive regulation of erythrocyte differentiation                                       | 2.49E-02 | <b>1.25E-01</b> | 39.77 | 1/15 | 31/18493  |
| GO:0051085 | chaperone cofactor-dependent protein refolding                                           | 2.49E-02 | <b>1.25E-01</b> | 39.77 | 1/15 | 31/18493  |
| GO:1905063 | regulation of vascular smooth muscle cell differentiation                                | 2.49E-02 | <b>1.25E-01</b> | 39.77 | 1/15 | 31/18493  |
| GO:0009141 | nucleoside triphosphate metabolic process                                                | 2.50E-02 | <b>1.25E-01</b> | 8.03  | 2/15 | 307/18493 |
| GO:0006007 | glucose catabolic process                                                                | 2.57E-02 | <b>1.25E-01</b> | 38.53 | 1/15 | 32/18493  |
| GO:0016486 | peptide hormone processing                                                               | 2.57E-02 | <b>1.25E-01</b> | 38.53 | 1/15 | 32/18493  |
| GO:0001666 | response to hypoxia                                                                      | 2.61E-02 | <b>1.25E-01</b> | 7.85  | 2/15 | 314/18493 |
| GO:0033198 | response to ATP                                                                          | 2.64E-02 | <b>1.25E-01</b> | 37.36 | 1/15 | 33/18493  |
| GO:0008202 | steroid metabolic process                                                                | 2.67E-02 | <b>1.25E-01</b> | 7.75  | 2/15 | 318/18493 |
| GO:0071868 | cellular response to monoamine stimulus                                                  | 2.72E-02 | <b>1.25E-01</b> | 36.26 | 1/15 | 34/18493  |
| GO:0071870 | cellular response to catecholamine stimulus                                              | 2.72E-02 | <b>1.25E-01</b> | 36.26 | 1/15 | 34/18493  |
| GO:0009123 | nucleoside monophosphate metabolic process                                               | 2.73E-02 | <b>1.25E-01</b> | 7.66  | 2/15 | 322/18493 |
| GO:0036293 | response to decreased oxygen levels                                                      | 2.78E-02 | <b>1.25E-01</b> | 7.59  | 2/15 | 325/18493 |
| GO:0070423 | nucleotide-binding oligomerization domain containing signaling pathway                   | 2.80E-02 | <b>1.25E-01</b> | 35.22 | 1/15 | 35/18493  |
| GO:1901020 | negative regulation of calcium ion transmembrane transporter activity                    | 2.80E-02 | <b>1.25E-01</b> | 35.22 | 1/15 | 35/18493  |
| GO:1901099 | negative regulation of signal transduction in absence of ligand                          | 2.80E-02 | <b>1.25E-01</b> | 35.22 | 1/15 | 35/18493  |



|            |                                                                                      |          |                 |       |      |           |
|------------|--------------------------------------------------------------------------------------|----------|-----------------|-------|------|-----------|
| GO:2001240 | negative regulation of extrinsic apoptotic signaling pathway in absence of ligand    | 2.80E-02 | <b>1.25E-01</b> | 35.22 | 1/15 | 35/18493  |
| GO:0001662 | behavioral fear response                                                             | 2.88E-02 | <b>1.25E-01</b> | 34.25 | 1/15 | 36/18493  |
| GO:0002209 | behavioral defense response                                                          | 2.88E-02 | <b>1.25E-01</b> | 34.25 | 1/15 | 36/18493  |
| GO:0006699 | bile acid biosynthetic process                                                       | 2.88E-02 | <b>1.25E-01</b> | 34.25 | 1/15 | 36/18493  |
| GO:0010591 | regulation of lamellipodium assembly                                                 | 2.88E-02 | <b>1.25E-01</b> | 34.25 | 1/15 | 36/18493  |
| GO:0033120 | positive regulation of RNA splicing                                                  | 2.88E-02 | <b>1.25E-01</b> | 34.25 | 1/15 | 36/18493  |
| GO:0035872 | nucleotide-binding domain, leucine rich repeat containing receptor signaling pathway | 2.88E-02 | <b>1.25E-01</b> | 34.25 | 1/15 | 36/18493  |
| GO:0051084 | 'de novo' posttranslational protein folding                                          | 2.88E-02 | <b>1.25E-01</b> | 34.25 | 1/15 | 36/18493  |
| GO:0060236 | regulation of mitotic spindle organization                                           | 2.88E-02 | <b>1.25E-01</b> | 34.25 | 1/15 | 36/18493  |
| GO:1900115 | extracellular regulation of signal transduction                                      | 2.88E-02 | <b>1.25E-01</b> | 34.25 | 1/15 | 36/18493  |
| GO:1900116 | extracellular negative regulation of signal transduction                             | 2.88E-02 | <b>1.25E-01</b> | 34.25 | 1/15 | 36/18493  |
| GO:1901385 | regulation of voltage-gated calcium channel activity                                 | 2.88E-02 | <b>1.25E-01</b> | 34.25 | 1/15 | 36/18493  |
| GO:0050435 | amyloid-beta metabolic process                                                       | 2.96E-02 | <b>1.25E-01</b> | 33.32 | 1/15 | 37/18493  |
| GO:0051693 | actin filament capping                                                               | 2.96E-02 | <b>1.25E-01</b> | 33.32 | 1/15 | 37/18493  |
| GO:0007178 | transmembrane receptor protein serine/threonine kinase signaling pathway             | 3.02E-02 | <b>1.25E-01</b> | 7.25  | 2/15 | 340/18493 |
| GO:0006734 | NADH metabolic process                                                               | 3.04E-02 | <b>1.25E-01</b> | 32.44 | 1/15 | 38/18493  |
| GO:0042596 | fear response                                                                        | 3.04E-02 | <b>1.25E-01</b> | 32.44 | 1/15 | 38/18493  |
| GO:0071867 | response to monoamine                                                                | 3.04E-02 | <b>1.25E-01</b> | 32.44 | 1/15 | 38/18493  |
| GO:0071869 | response to catecholamine                                                            | 3.04E-02 | <b>1.25E-01</b> | 32.44 | 1/15 | 38/18493  |
| GO:1902903 | regulation of supramolecular fiber organization                                      | 3.07E-02 | <b>1.25E-01</b> | 7.19  | 2/15 | 343/18493 |
| GO:1903053 | regulation of extracellular matrix organization                                      | 3.12E-02 | <b>1.25E-01</b> | 31.61 | 1/15 | 39/18493  |
| GO:0070482 | response to oxygen levels                                                            | 3.17E-02 | <b>1.25E-01</b> | 7.07  | 2/15 | 349/18493 |
| GO:0001990 | regulation of systemic arterial blood pressure by hormone                            | 3.20E-02 | <b>1.25E-01</b> | 30.82 | 1/15 | 40/18493  |
| GO:0006458 | 'de novo' protein folding                                                            | 3.20E-02 | <b>1.25E-01</b> | 30.82 | 1/15 | 40/18493  |
| GO:0030835 | negative regulation of actin filament depolymerization                               | 3.20E-02 | <b>1.25E-01</b> | 30.82 | 1/15 | 40/18493  |
| GO:0090224 | regulation of spindle organization                                                   | 3.20E-02 | <b>1.25E-01</b> | 30.82 | 1/15 | 40/18493  |



|            |                                                                                                     |          |                 |       |      |           |
|------------|-----------------------------------------------------------------------------------------------------|----------|-----------------|-------|------|-----------|
| GO:1903170 | negative regulation of calcium ion transmembrane transport                                          | 3.20E-02 | <b>1.25E-01</b> | 30.82 | 1/15 | 40/18493  |
| GO:0035886 | vascular smooth muscle cell differentiation                                                         | 3.28E-02 | <b>1.26E-01</b> | 30.07 | 1/15 | 41/18493  |
| GO:1901028 | regulation of mitochondrial outer membrane permeabilization involved in apoptotic signaling pathway | 3.28E-02 | <b>1.26E-01</b> | 30.07 | 1/15 | 41/18493  |
| GO:0042551 | neuron maturation                                                                                   | 3.35E-02 | <b>1.27E-01</b> | 29.35 | 1/15 | 42/18493  |
| GO:0007212 | dopamine receptor signaling pathway                                                                 | 3.43E-02 | <b>1.27E-01</b> | 28.67 | 1/15 | 43/18493  |
| GO:0010613 | positive regulation of cardiac muscle hypertrophy                                                   | 3.43E-02 | <b>1.27E-01</b> | 28.67 | 1/15 | 43/18493  |
| GO:0014742 | positive regulation of muscle hypertrophy                                                           | 3.43E-02 | <b>1.27E-01</b> | 28.67 | 1/15 | 43/18493  |
| GO:0031113 | regulation of microtubule polymerization                                                            | 3.43E-02 | <b>1.27E-01</b> | 28.67 | 1/15 | 43/18493  |
| GO:1903573 | negative regulation of response to endoplasmic reticulum stress                                     | 3.43E-02 | <b>1.27E-01</b> | 28.67 | 1/15 | 43/18493  |
| GO:0032535 | regulation of cellular component size                                                               | 3.48E-02 | <b>1.27E-01</b> | 6.72  | 2/15 | 367/18493 |
| GO:0000096 | sulfur amino acid metabolic process                                                                 | 3.51E-02 | <b>1.27E-01</b> | 28.02 | 1/15 | 44/18493  |
| GO:0033628 | regulation of cell adhesion mediated by integrin                                                    | 3.51E-02 | <b>1.27E-01</b> | 28.02 | 1/15 | 44/18493  |
| GO:0009069 | serine family amino acid metabolic process                                                          | 3.59E-02 | <b>1.28E-01</b> | 27.40 | 1/15 | 45/18493  |
| GO:1900034 | regulation of cellular response to heat                                                             | 3.59E-02 | <b>1.28E-01</b> | 27.40 | 1/15 | 45/18493  |
| GO:0001961 | positive regulation of cytokine-mediated signaling pathway                                          | 3.67E-02 | <b>1.28E-01</b> | 26.80 | 1/15 | 46/18493  |
| GO:0008206 | bile acid metabolic process                                                                         | 3.67E-02 | <b>1.28E-01</b> | 26.80 | 1/15 | 46/18493  |
| GO:0032757 | positive regulation of interleukin-8 production                                                     | 3.67E-02 | <b>1.28E-01</b> | 26.80 | 1/15 | 46/18493  |
| GO:2001239 | regulation of extrinsic apoptotic signaling pathway in absence of ligand                            | 3.67E-02 | <b>1.28E-01</b> | 26.80 | 1/15 | 46/18493  |
| GO:0045646 | regulation of erythrocyte differentiation                                                           | 3.75E-02 | <b>1.30E-01</b> | 26.23 | 1/15 | 47/18493  |
| GO:0010639 | negative regulation of organelle organization                                                       | 3.78E-02 | <b>1.30E-01</b> | 6.42  | 2/15 | 384/18493 |
| GO:1902743 | regulation of lamellipodium organization                                                            | 3.82E-02 | <b>1.31E-01</b> | 25.68 | 1/15 | 48/18493  |
| GO:0003044 | regulation of systemic arterial blood pressure mediated by a chemical signal                        | 3.90E-02 | <b>1.32E-01</b> | 25.16 | 1/15 | 49/18493  |
| GO:2001233 | regulation of apoptotic signaling pathway                                                           | 3.90E-02 | <b>1.32E-01</b> | 6.31  | 2/15 | 391/18493 |
| GO:0010171 | body morphogenesis                                                                                  | 3.98E-02 | <b>1.33E-01</b> | 24.66 | 1/15 | 50/18493  |
| GO:0030834 | regulation of actin filament depolymerization                                                       | 3.98E-02 | <b>1.33E-01</b> | 24.66 | 1/15 | 50/18493  |

|            |                                                                                          |          |                 |       |      |           |
|------------|------------------------------------------------------------------------------------------|----------|-----------------|-------|------|-----------|
| GO:0009066 | aspartate family amino acid metabolic process                                            | 4.06E-02 | <b>1.33E-01</b> | 24.17 | 1/15 | 51/18493  |
| GO:0030514 | negative regulation of BMP signaling pathway                                             | 4.06E-02 | <b>1.33E-01</b> | 24.17 | 1/15 | 51/18493  |
| GO:0097345 | mitochondrial outer membrane permeabilization                                            | 4.06E-02 | <b>1.33E-01</b> | 24.17 | 1/15 | 51/18493  |
| GO:2001258 | negative regulation of cation channel activity                                           | 4.06E-02 | <b>1.33E-01</b> | 24.17 | 1/15 | 51/18493  |
| GO:0051150 | regulation of smooth muscle cell differentiation                                         | 4.14E-02 | <b>1.33E-01</b> | 23.71 | 1/15 | 52/18493  |
| GO:0060760 | positive regulation of response to cytokine stimulus                                     | 4.14E-02 | <b>1.33E-01</b> | 23.71 | 1/15 | 52/18493  |
| GO:0009435 | NAD biosynthetic process                                                                 | 4.22E-02 | <b>1.33E-01</b> | 23.26 | 1/15 | 53/18493  |
| GO:0010823 | negative regulation of mitochondrion organization                                        | 4.22E-02 | <b>1.33E-01</b> | 23.26 | 1/15 | 53/18493  |
| GO:0030042 | actin filament depolymerization                                                          | 4.22E-02 | <b>1.33E-01</b> | 23.26 | 1/15 | 53/18493  |
| GO:0043954 | cellular component maintenance                                                           | 4.22E-02 | <b>1.33E-01</b> | 23.26 | 1/15 | 53/18493  |
| GO:0019320 | hexose catabolic process                                                                 | 4.29E-02 | <b>1.33E-01</b> | 22.83 | 1/15 | 54/18493  |
| GO:0031295 | T cell costimulation                                                                     | 4.29E-02 | <b>1.33E-01</b> | 22.83 | 1/15 | 54/18493  |
| GO:0051090 | regulation of DNA-binding transcription factor activity                                  | 4.29E-02 | <b>1.33E-01</b> | 5.98  | 2/15 | 412/18493 |
| GO:0031294 | lymphocyte costimulation                                                                 | 4.37E-02 | <b>1.35E-01</b> | 22.42 | 1/15 | 55/18493  |
| GO:0044273 | sulfur compound catabolic process                                                        | 4.45E-02 | <b>1.37E-01</b> | 22.02 | 1/15 | 56/18493  |
| GO:0030837 | negative regulation of actin filament polymerization                                     | 4.53E-02 | <b>1.38E-01</b> | 21.63 | 1/15 | 57/18493  |
| GO:1902110 | positive regulation of mitochondrial membrane permeability involved in apoptotic process | 4.53E-02 | <b>1.38E-01</b> | 21.63 | 1/15 | 57/18493  |
| GO:0010803 | regulation of tumor necrosis factor-mediated signaling pathway                           | 4.68E-02 | <b>1.40E-01</b> | 20.90 | 1/15 | 59/18493  |
| GO:0070059 | intrinsic apoptotic signaling pathway in response to endoplasmic reticulum stress        | 4.68E-02 | <b>1.40E-01</b> | 20.90 | 1/15 | 59/18493  |
| GO:1902686 | mitochondrial outer membrane permeabilization involved in programmed cell death          | 4.68E-02 | <b>1.40E-01</b> | 20.90 | 1/15 | 59/18493  |
| GO:0002753 | cytoplasmic pattern recognition receptor signaling pathway                               | 4.76E-02 | <b>1.40E-01</b> | 20.55 | 1/15 | 60/18493  |
| GO:0061077 | chaperone-mediated protein folding                                                       | 4.76E-02 | <b>1.40E-01</b> | 20.55 | 1/15 | 60/18493  |
| GO:0090307 | mitotic spindle assembly                                                                 | 4.76E-02 | <b>1.40E-01</b> | 20.55 | 1/15 | 60/18493  |
| GO:0035794 | positive regulation of mitochondrial membrane permeability                               | 4.84E-02 | <b>1.42E-01</b> | 20.21 | 1/15 | 61/18493  |
| GO:0019748 | secondary metabolic process                                                              | 4.91E-02 | <b>1.43E-01</b> | 19.88 | 1/15 | 62/18493  |

|            |                                                                                 |          |                 |       |      |           |
|------------|---------------------------------------------------------------------------------|----------|-----------------|-------|------|-----------|
| GO:1902108 | regulation of mitochondrial membrane permeability involved in apoptotic process | 4.99E-02 | <b>1.44E-01</b> | 19.57 | 1/15 | 63/18493  |
| GO:1905710 | positive regulation of membrane permeability                                    | 4.99E-02 | <b>1.44E-01</b> | 19.57 | 1/15 | 63/18493  |
| GO:0043254 | regulation of protein complex assembly                                          | 5.05E-02 | <b>1.44E-01</b> | 5.47  | 2/15 | 451/18493 |
| GO:0046365 | monosaccharide catabolic process                                                | 5.07E-02 | <b>1.44E-01</b> | 19.26 | 1/15 | 64/18493  |
| GO:1901880 | negative regulation of protein depolymerization                                 | 5.07E-02 | <b>1.44E-01</b> | 19.26 | 1/15 | 64/18493  |
| GO:0033627 | cell adhesion mediated by integrin                                              | 5.15E-02 | <b>1.44E-01</b> | 18.97 | 1/15 | 65/18493  |
| GO:0051926 | negative regulation of calcium ion transport                                    | 5.15E-02 | <b>1.44E-01</b> | 18.97 | 1/15 | 65/18493  |
| GO:0032677 | regulation of interleukin-8 production                                          | 5.22E-02 | <b>1.44E-01</b> | 18.68 | 1/15 | 66/18493  |
| GO:0030032 | lamellipodium assembly                                                          | 5.30E-02 | <b>1.44E-01</b> | 18.40 | 1/15 | 67/18493  |
| GO:0006625 | protein targeting to peroxisome                                                 | 5.38E-02 | <b>1.44E-01</b> | 18.13 | 1/15 | 68/18493  |
| GO:0072662 | protein localization to peroxisome                                              | 5.38E-02 | <b>1.44E-01</b> | 18.13 | 1/15 | 68/18493  |
| GO:0072663 | establishment of protein localization to peroxisome                             | 5.38E-02 | <b>1.44E-01</b> | 18.13 | 1/15 | 68/18493  |
| GO:1901607 | alpha-amino acid biosynthetic process                                           | 5.38E-02 | <b>1.44E-01</b> | 18.13 | 1/15 | 68/18493  |
| GO:0043574 | peroxisomal transport                                                           | 5.45E-02 | <b>1.44E-01</b> | 17.87 | 1/15 | 69/18493  |
| GO:0032272 | negative regulation of protein polymerization                                   | 5.53E-02 | <b>1.44E-01</b> | 17.61 | 1/15 | 70/18493  |
| GO:1901264 | carbohydrate derivative transport                                               | 5.53E-02 | <b>1.44E-01</b> | 17.61 | 1/15 | 70/18493  |
| GO:0019674 | NAD metabolic process                                                           | 5.61E-02 | <b>1.44E-01</b> | 17.36 | 1/15 | 71/18493  |
| GO:0031110 | regulation of microtubule polymerization or depolymerization                    | 5.61E-02 | <b>1.44E-01</b> | 17.36 | 1/15 | 71/18493  |
| GO:0038034 | signal transduction in absence of ligand                                        | 5.61E-02 | <b>1.44E-01</b> | 17.36 | 1/15 | 71/18493  |
| GO:0043242 | negative regulation of protein complex disassembly                              | 5.61E-02 | <b>1.44E-01</b> | 17.36 | 1/15 | 71/18493  |
| GO:0046785 | microtubule polymerization                                                      | 5.61E-02 | <b>1.44E-01</b> | 17.36 | 1/15 | 71/18493  |
| GO:0097192 | extrinsic apoptotic signaling pathway in absence of ligand                      | 5.61E-02 | <b>1.44E-01</b> | 17.36 | 1/15 | 71/18493  |
| GO:0006635 | fatty acid beta-oxidation                                                       | 5.69E-02 | <b>1.44E-01</b> | 17.12 | 1/15 | 72/18493  |
| GO:0033555 | multicellular organismal response to stress                                     | 5.69E-02 | <b>1.44E-01</b> | 17.12 | 1/15 | 72/18493  |
| GO:0043312 | neutrophil degranulation                                                        | 5.75E-02 | <b>1.44E-01</b> | 5.08  | 2/15 | 485/18493 |
| GO:0031397 | negative regulation of protein ubiquitination                                   | 5.76E-02 | <b>1.44E-01</b> | 16.89 | 1/15 | 73/18493  |
| GO:0032637 | interleukin-8 production                                                        | 5.76E-02 | <b>1.44E-01</b> | 16.89 | 1/15 | 73/18493  |
| GO:0046902 | regulation of mitochondrial membrane permeability                               | 5.76E-02 | <b>1.44E-01</b> | 16.89 | 1/15 | 73/18493  |

|            |                                                                                   |          |                 |       |      |           |
|------------|-----------------------------------------------------------------------------------|----------|-----------------|-------|------|-----------|
| GO:0002283 | neutrophil activation involved in immune response                                 | 5.82E-02 | <b>1.44E-01</b> | 5.05  | 2/15 | 488/18493 |
| GO:0009150 | purine ribonucleotide metabolic process                                           | 5.82E-02 | <b>1.44E-01</b> | 5.05  | 2/15 | 488/18493 |
| GO:0006096 | glycolytic process                                                                | 5.84E-02 | <b>1.44E-01</b> | 16.66 | 1/15 | 74/18493  |
| GO:0010611 | regulation of cardiac muscle hypertrophy                                          | 5.84E-02 | <b>1.44E-01</b> | 16.66 | 1/15 | 74/18493  |
| GO:0022617 | extracellular matrix disassembly                                                  | 5.84E-02 | <b>1.44E-01</b> | 16.66 | 1/15 | 74/18493  |
| GO:0032507 | maintenance of protein location in cell                                           | 5.84E-02 | <b>1.44E-01</b> | 16.66 | 1/15 | 74/18493  |
| GO:0006757 | ATP generation from ADP                                                           | 5.92E-02 | <b>1.44E-01</b> | 16.44 | 1/15 | 75/18493  |
| GO:0043618 | regulation of transcription from RNA polymerase II promoter in response to stress | 5.92E-02 | <b>1.44E-01</b> | 16.44 | 1/15 | 75/18493  |
| GO:0051051 | negative regulation of transport                                                  | 5.97E-02 | <b>1.44E-01</b> | 4.98  | 2/15 | 495/18493 |
| GO:0014743 | regulation of muscle hypertrophy                                                  | 5.99E-02 | <b>1.44E-01</b> | 16.22 | 1/15 | 76/18493  |
| GO:0051145 | smooth muscle cell differentiation                                                | 5.99E-02 | <b>1.44E-01</b> | 16.22 | 1/15 | 76/18493  |
| GO:0090066 | regulation of anatomical structure size                                           | 6.01E-02 | <b>1.44E-01</b> | 4.96  | 2/15 | 497/18493 |
| GO:0042119 | neutrophil activation                                                             | 6.03E-02 | <b>1.44E-01</b> | 4.95  | 2/15 | 498/18493 |
| GO:0002446 | neutrophil mediated immunity                                                      | 6.05E-02 | <b>1.44E-01</b> | 4.94  | 2/15 | 499/18493 |
| GO:0032413 | negative regulation of ion transmembrane transporter activity                     | 6.07E-02 | <b>1.44E-01</b> | 16.01 | 1/15 | 77/18493  |
| GO:0034644 | cellular response to UV                                                           | 6.15E-02 | <b>1.44E-01</b> | 15.81 | 1/15 | 78/18493  |
| GO:0042866 | pyruvate biosynthetic process                                                     | 6.15E-02 | <b>1.44E-01</b> | 15.81 | 1/15 | 78/18493  |
| GO:0051289 | protein homotetramerization                                                       | 6.15E-02 | <b>1.44E-01</b> | 15.81 | 1/15 | 78/18493  |
| GO:1905897 | regulation of response to endoplasmic reticulum stress                            | 6.15E-02 | <b>1.44E-01</b> | 15.81 | 1/15 | 78/18493  |
| GO:0030512 | negative regulation of transforming growth factor beta receptor signaling pathway | 6.22E-02 | <b>1.45E-01</b> | 15.61 | 1/15 | 79/18493  |
| GO:1901879 | regulation of protein depolymerization                                            | 6.22E-02 | <b>1.45E-01</b> | 15.61 | 1/15 | 79/18493  |
| GO:0007031 | peroxisome organization                                                           | 6.37E-02 | <b>1.45E-01</b> | 15.22 | 1/15 | 81/18493  |
| GO:0032436 | positive regulation of proteasomal ubiquitin-dependent protein catabolic process  | 6.37E-02 | <b>1.45E-01</b> | 15.22 | 1/15 | 81/18493  |
| GO:0043620 | regulation of DNA-templated transcription in response to stress                   | 6.37E-02 | <b>1.45E-01</b> | 15.22 | 1/15 | 81/18493  |
| GO:0090559 | regulation of membrane permeability                                               | 6.37E-02 | <b>1.45E-01</b> | 15.22 | 1/15 | 81/18493  |

|            |                                                                                      |          |                 |       |      |          |
|------------|--------------------------------------------------------------------------------------|----------|-----------------|-------|------|----------|
| GO:1903845 | negative regulation of cellular response to transforming growth factor beta stimulus | 6.37E-02 | <b>1.45E-01</b> | 15.22 | 1/15 | 81/18493 |
| GO:1903321 | negative regulation of protein modification by small protein conjugation or removal  | 6.53E-02 | <b>1.47E-01</b> | 14.85 | 1/15 | 83/18493 |
| GO:0042446 | hormone biosynthetic process                                                         | 6.60E-02 | <b>1.47E-01</b> | 14.68 | 1/15 | 84/18493 |
| GO:0046031 | ADP metabolic process                                                                | 6.60E-02 | <b>1.47E-01</b> | 14.68 | 1/15 | 84/18493 |
| GO:0050886 | endocrine process                                                                    | 6.60E-02 | <b>1.47E-01</b> | 14.68 | 1/15 | 84/18493 |
| GO:0097581 | lamellipodium organization                                                           | 6.60E-02 | <b>1.47E-01</b> | 14.68 | 1/15 | 84/18493 |
| GO:0008652 | cellular amino acid biosynthetic process                                             | 6.68E-02 | <b>1.49E-01</b> | 14.50 | 1/15 | 85/18493 |
| GO:1901019 | regulation of calcium ion transmembrane transporter activity                         | 6.76E-02 | <b>1.50E-01</b> | 14.34 | 1/15 | 86/18493 |

Table S5. Logistic regression results measuring association between *PVRIG* groups and functional gene sets

| Variables                  |            |                       | Total (N) | PVRIG-High (n) | Statistic | p-value         | log(OR) (CI)      | OR   |
|----------------------------|------------|-----------------------|-----------|----------------|-----------|-----------------|-------------------|------|
| Bindea-T_cells             |            |                       | 602       | 301            | 11.56     | <b>6.73E-31</b> | 1.68 (1.4-1.97)   | 5.35 |
| Bindea-B_cells             |            |                       | 602       | 301            | 11.01     | <b>3.39E-28</b> | 1.48 (1.23-1.76)  | 4.41 |
| Bindea-Cytotoxic_cells     |            |                       | 602       | 301            | 10.92     | <b>8.86E-28</b> | 1.5 (1.24-1.78)   | 4.48 |
| Bindea-Th1_cells           |            |                       | 602       | 301            | 9.66      | <b>4.27E-22</b> | 1.14 (0.92-1.38)  | 3.13 |
| Bindea-Tgd                 |            |                       | 602       | 301            | 9.58      | <b>9.56E-22</b> | 1.07 (0.86-1.29)  | 2.91 |
| Bindea-aDC                 |            |                       | 602       | 301            | 8.98      | <b>2.79E-19</b> | 1.01 (0.79-1.23)  | 2.74 |
| Bindea-Tem                 |            |                       | 602       | 301            | 8.29      | <b>1.18E-16</b> | 0.85 (0.66-1.06)  | 2.34 |
| Bindea-TFH                 |            |                       | 602       | 301            | 8.2       | <b>2.43E-16</b> | 0.86 (0.66-1.07)  | 2.37 |
| Bindea-NK_CD56dim_cells    |            |                       | 602       | 301            | 7.79      | <b>6.82E-15</b> | 0.8 (0.6-1.0)     | 2.22 |
| Bindea-NK_cells            |            |                       | 602       | 301            | 7.51      | <b>5.72E-14</b> | 0.73 (0.54-0.92)  | 2.07 |
| Bindea-CD8_T_cells         |            |                       | 602       | 301            | 7.45      | <b>9.13E-14</b> | 0.73 (0.54-0.92)  | 2.07 |
| Bindea-iDC                 |            |                       | 602       | 301            | 7.36      | <b>1.86E-13</b> | 0.7 (0.52-0.89)   | 2.01 |
| Bindea-Macrophages         |            |                       | 602       | 301            | 6.92      | <b>4.48E-12</b> | 0.66 (0.48-0.85)  | 1.93 |
| Bindea-NK_CD56bright_cells |            |                       | 602       | 301            | 6.59      | <b>4.44E-11</b> | 0.62 (0.44-0.8)   | 1.85 |
| Bindea-Tcm                 |            |                       | 602       | 301            | 6.54      | <b>6.34E-11</b> | 0.61 (0.43-0.79)  | 1.83 |
| Bindea-DC                  |            |                       | 602       | 301            | 6.44      | 1.23E-10        | 0.59 (0.41-0.77)  | 1.8  |
| Bindea-Neutrophils         |            |                       | 602       | 301            | 6.23      | 4.75E-10        | 0.57 (0.4-0.76)   | 1.77 |
| Bindea-T_helper_cells      |            |                       | 602       | 301            | 6.2       | 5.56E-10        | 0.57 (0.39-0.75)  | 1.76 |
| Bindea-Th2_cells           |            |                       | 602       | 301            | 5.51      | 3.63E-08        | 0.49 (0.32-0.66)  | 1.62 |
| Bindea-Eosinophils         |            |                       | 602       | 301            | 4.75      | 2.01E-06        | 0.41 (0.25-0.59)  | 1.51 |
| Bindea-Mast_cells          |            |                       | 602       | 301            | 4.58      | 4.72E-06        | 0.4 (0.23-0.57)   | 1.49 |
| Bindea-Treg                |            |                       | 602       | 301            | 4.19      | 2.76E-05        | 0.37 (0.2-0.54)   | 1.44 |
| Bindea-pDC                 |            |                       | 602       | 301            | 4.11      | 4.03E-05        | 0.35 (0.19-0.53)  | 1.42 |
| Bindea-Th17_cells          |            |                       | 602       | 301            | 0.51      | 6.13E-01        | 0.04 (-0.12-0.2)  | 1.04 |
| TILs-Lymphoids             |            |                       | 602       | 301            | 11.71     | <b>1.09E-31</b> | 2.19 (1.84-2.58)  | 8.97 |
| TILs-TIL_score             |            |                       | 602       | 301            | 11.52     | <b>1.01E-30</b> | 1.81 (1.52-2.14)  | 6.13 |
| TILs-Myeloids              |            |                       | 602       | 301            | 9.09      | <b>1.02E-19</b> | 1.01 (0.8-1.24)   | 2.75 |
| TILs-Stroma                |            |                       | 602       | 301            | 4.81      | <b>1.50E-06</b> | 0.44 (0.26-0.62)  | 1.55 |
| TILs-Cancer                |            |                       | 602       | 301            | 0.15      | 8.82E-01        | 0.01 (-0.15-0.17) | 1.01 |
| ICR                        |            |                       | 602       | 301            | 10.7      | <b>9.80E-27</b> | 1.62 (1.34-1.93)  | 5.05 |
| Ayers-TIS                  |            |                       | 602       | 301            | 10.64     | <b>1.92E-26</b> | 1.5 (1.23-1.79)   | 4.47 |
| Coppola-TLS                |            |                       | 602       | 301            | 10.47     | <b>1.15E-25</b> | 1.27 (1.04-1.52)  | 3.57 |
| Rooney-Cyto_act            |            |                       | 602       | 301            | 10.29     | <b>7.66E-25</b> | 1.44 (1.18-1.72)  | 4.22 |
| APMS_score                 |            |                       | 602       | 301            | 4.7       | <b>2.56E-06</b> | 0.41 (0.24-0.58)  | 1.51 |
| Kieffer - CAF-S1           |            |                       | 602       | 301            | 7.07      | <b>1.54E-12</b> | 0.67 (0.49-0.86)  | 1.96 |
| Givel - CAF-S4             |            |                       | 602       | 301            | 6.09      | 1.16E-09        | 0.6 (0.41-0.8)    | 1.82 |
| Biffi - iCAF               |            |                       | 602       | 301            | 5.34      | <b>9.11E-08</b> | 0.48 (0.31-0.66)  | 1.61 |
| Biffi - myCAF              |            |                       | 602       | 301            | 5.25      | 1.48E-07        | 0.46 (0.29-0.64)  | 1.59 |
| CAF-S1                     | iCAF myCAF | Kieffer - wound-myCAF | 602       | 301            | 6.05      | <b>1.42E-09</b> | 0.55 (0.38-0.73)  | 1.74 |
|                            |            | Kieffer - ecm-myCAF   | 602       | 301            | 5.64      | <b>1.71E-08</b> | 0.51 (0.34-0.69)  | 1.66 |
|                            |            | Kieffer - TGFβ-myCAF  | 602       | 301            | 5.54      | <b>3.00E-08</b> | 0.5 (0.33-0.68)   | 1.65 |
|                            |            | Kieffer - IFNγ-iCAF   | 602       | 301            | 9.39      | <b>6.26E-21</b> | 1.01 (0.81-1.23)  | 2.75 |
|                            |            | Kieffer - IL-iCAF     | 602       | 301            | 7.8       | <b>6.27E-15</b> | 0.78 (0.59-0.98)  | 2.18 |

---

|  |                      |     |     |      |                 |                  |      |
|--|----------------------|-----|-----|------|-----------------|------------------|------|
|  | Kieffer - detox-iCAF | 602 | 301 | 6.55 | <b>5.84E-11</b> | 0.64 (0.45-0.83) | 1.89 |
|--|----------------------|-----|-----|------|-----------------|------------------|------|
